# Supplementary material for: Comparing contaminants of emerging concern and microbial signatures of wastewater treated by membrane bioreactor and oxidation ditch methods
Source: Royal Society of Chemistry journal article supplement (doi:10.1039/d4ew00793j), 2025-01-01
Supplement: d4ew00793j1.xlsx [file d4ew00793j1.xlsx]

## Sheet: TableOfContents
Supplementary information for:
Comparison of trace organic contaminant and microbial signatures of wastewater treated by membrane bioreactor and oxidation ditch methods
Givens, C.E.a, Elliott, S.M.b, Kiesling, R.L.b, Christen, C.H.c, Schoenfuss, H.L.c
aUpper Midwest Water Science Center, U.S. Geological Survey, Lansing, Michigan, USA
bUpper Midwest Water Science Center, U.S. Geological Survey, St. Paul, Minnesota, USA
cAquatic Toxicology Laboratory, St. Cloud State University, St. Cloud, Minnesota, USA
9 tables
2 figures
Corresponding author: selliott@usgs.gov
Disclaimer: Any use of trade, firm, or product names is for descriptive purposes only and does not imply endorsement by the U.S. Government.

## Sheet: TblS1.ChemsAnalyzed
Table S1. List of contaminants of emerging concern that were analyzed in primary treated effluent, effluent treated by conventional activated sludge, and effluent treated by membrane bioreactor samples collected from a domestic wastewater treatment facility, 2022. USGS NWQL, U.S. Geological Survey National Water Quality Laboratory in Lakewood, Colorado; GC-MS/MS, gas chromatography tandem mass sp…
Chemical name	CASRN	Chemical class	Secondary class	Analyzing laboratory	Analytical method	Analytical method reference	Maximum reporting level, nanograms per liter
4-n-Octylphenol	1806-26-4	Alkylphenol	--	SGS AXYS	GC-MS	SGS AXYS	50
4-Nonylphenol diethoxylates	--	Alkylphenol	--	SGS AXYS	GC-MS	SGS AXYS	50
4-Nonylphenol monoethoxylates	--	Alkylphenol	--	SGS AXYS	GC-MS	SGS AXYS	50
4-Nonylphenols	84852-15-3	Alkylphenol	--	SGS AXYS	GC-MS	SGS AXYS	10
C6-4-Nonylphenol	--	Alkylphenol surrogate	--	SGS AXYS	GC-MS	SGS AXYS	--
C6-4-Nonylphenol diethoxylate	--	Alkylphenol surrogate	--	SGS AXYS	GC-MS	SGS AXYS	--
Bisphenol A	80-05-7	Bisphenol	--	SGS AXYS	UPLC-MS/MS	SGS AXYS	5
Bisphenol AF	1478-61-1	Bisphenol	--	SGS AXYS	UPLC-MS/MS	SGS AXYS	2
Bisphenol B	77-40-7	Bisphenol	--	SGS AXYS	UPLC-MS/MS	SGS AXYS	2
Bisphenol E	2081-08-5	Bisphenol	--	SGS AXYS	UPLC-MS/MS	SGS AXYS	5
Bisphenol F	620-92-8	Bisphenol	--	SGS AXYS	UPLC-MS/MS	SGS AXYS	5
Bisphenol S	80-09-1	Bisphenol	--	SGS AXYS	UPLC-MS/MS	SGS AXYS	2
13C12-Bisphenol A	--	Bisphenol isotope labelled standard	--	SGS AXYS	UPLC-MS/MS	SGS AXYS	--
13C12-Bisphenol AF	--	Bisphenol isotope labelled standard	--	SGS AXYS	UPLC-MS/MS	SGS AXYS	--
13C12-Bisphenol B	--	Bisphenol isotope labelled standard	--	SGS AXYS	UPLC-MS/MS	SGS AXYS	--
13C12-Bisphenol F	--	Bisphenol isotope labelled standard	--	SGS AXYS	UPLC-MS/MS	SGS AXYS	--
13C12-Bisphenol S	--	Bisphenol isotope labelled standard	--	SGS AXYS	UPLC-MS/MS	SGS AXYS	--
Methylbenzotriazole	29385-43-1	Corrosion inhibitor1	--	USGS NWQL	direct injection LC-MS/MS	Furlong et al. (2014)	80
11-Ketotestosterone	564-35-2	Hormone	--	USGS NWQL	GC-MS/MS	Foreman et al. (2012)	5
17-alpha-Estradiol	57-9-0	Hormone	--	USGS NWQL	GC-MS/MS	Foreman et al. (2012)	2
17-alpha-Ethynylestradiol	350820-06-3	Hormone	--	USGS NWQL	GC-MS/MS	Foreman et al. (2012)	2
17-beta-Estradiol	50-28-2	Hormone	--	USGS NWQL	GC-MS/MS	Foreman et al. (2012)	4
4-Androstene-3,17-dione	63-05-8	Hormone	--	USGS NWQL	GC-MS/MS	Foreman et al. (2012)	5
Bisphenol A	80-05-7	Hormone	--	USGS NWQL	GC-MS/MS	Foreman et al. (2012)	100
cis-Androsterone	53-41-8	Hormone	--	USGS NWQL	GC-MS/MS	Foreman et al. (2012)	2
Dihydrotestosterone	521-18-6	Hormone	--	USGS NWQL	GC-MS/MS	Foreman et al. (2012)	6
Epitestosterone	481-30-1	Hormone	--	USGS NWQL	GC-MS/MS	Foreman et al. (2012)	4
Equilenin	517-09-9	Hormone	--	USGS NWQL	GC-MS/MS	Foreman et al. (2012)	4
Equilin	474-86-2	Hormone	--	USGS NWQL	GC-MS/MS	Foreman et al. (2012)	16
Estriol	50-27-1	Hormone	--	USGS NWQL	GC-MS/MS	Foreman et al. (2012)	2
Estrone	53-16-7	Hormone	--	USGS NWQL	GC-MS/MS	Foreman et al. (2012)	4
Mestranol	72-33-3	Hormone	--	USGS NWQL	GC-MS/MS	Foreman et al. (2012)	6
Norethindrone	68-22-4	Hormone	--	USGS NWQL	GC-MS/MS	Foreman et al. (2012)	4
Progesterone	57-83-0	Hormone	--	USGS NWQL	GC-MS/MS	Foreman et al. (2012)	12
Testosterone	58-22-0	Hormone	--	USGS NWQL	GC-MS/MS	Foreman et al. (2012)	6
trans-Diethylstilbestrol	56-53-1	Hormone	--	USGS NWQL	GC-MS/MS	Foreman et al. (2012)	1.3
16-Epiestriol-2,4-d2	--	Hormone isotope dilution standard	--	USGS NWQL	GC-MS/MS	Foreman et al. (2012)	--
17-alpha-Ethynylestradiol-2,4,16,16-d4	--	Hormone isotope dilution standard	--	USGS NWQL	GC-MS/MS	Foreman et al. (2012)	--
17-beta-Estradiol-13,14,15,16,17,18-13C6	--	Hormone isotope dilution standard	--	USGS NWQL	GC-MS/MS	Foreman et al. (2012)	--
Bisphenol A-d16	--	Hormone isotope dilution standard	--	USGS NWQL	GC-MS/MS	Foreman et al. (2012)	--
Cholesterol-25,26,26,26,27,27,27-d7	--	Hormone isotope dilution standard	--	USGS NWQL	GC-MS/MS	Foreman et al. (2012)	--
cis-Androsterone-2,2,3,4,4-d5	--	Hormone isotope dilution standard	--	USGS NWQL	GC-MS/MS	Foreman et al. (2012)	--
Estriol-2,4,16,17-d4	--	Hormone isotope dilution standard	--	USGS NWQL	GC-MS/MS	Foreman et al. (2012)	--
Estrone-13,14,15,16,17,18-13C6	--	Hormone isotope dilution standard	--	USGS NWQL	GC-MS/MS	Foreman et al. (2012)	--
Medroxyprogesterone-d3	--	Hormone isotope dilution standard	--	USGS NWQL	GC-MS/MS	Foreman et al. (2012)	--
Mestranol-2,4,16,16-d4	--	Hormone isotope dilution standard	--	USGS NWQL	GC-MS/MS	Foreman et al. (2012)	--
Nandrolone-16,16,17-d3	--	Hormone isotope dilution standard	--	USGS NWQL	GC-MS/MS	Foreman et al. (2012)	--
Progesterone-2,3,4-13C3	--	Hormone isotope dilution standard	--	USGS NWQL	GC-MS/MS	Foreman et al. (2012)	--
trans-Diethyl-1,1,1',1'-d4-stilbestrol-3,3',5,5'-d4	--	Hormone isotope dilution standard	--	USGS NWQL	GC-MS/MS	Foreman et al. (2012)	--
1H-1-2-4-Triazole	288-88-0	Pesticide	Fungicide	USGS NWQL	direct injection LC-MS/MS	Sandstrom et al. (2015)	22
2-4-D	94-75-7	Pesticide	Herbicide	USGS NWQL	direct injection LC-MS/MS	Sandstrom et al. (2015)	62
2-Hydroxy-4-isopropylamino-6-amino-s-triazine (OIAT)	19988-24-0	Pesticide	Herbicide	USGS NWQL	direct injection LC-MS/MS	Sandstrom et al. (2015)	4
2-Hydroxyatrazine (OIET)	2163-68-0	Pesticide	Herbicide	USGS NWQL	direct injection LC-MS/MS	Sandstrom et al. (2015)	8
3-Phenoxybenzoic acid	3739-38-6	Pesticide	Insecticide	USGS NWQL	direct injection LC-MS/MS	Sandstrom et al. (2015)	61
4-Hydroxychlorothalonil	28343-61-5	Pesticide	Fungicide	USGS NWQL	direct injection LC-MS/MS	Sandstrom et al. (2015)	42
Acephate	30560-19-1	Pesticide	Insecticide	USGS NWQL	direct injection LC-MS/MS	Sandstrom et al. (2015)	10
Acetochlor	34256-82-1	Pesticide	Herbicide	USGS NWQL	direct injection LC-MS/MS	Sandstrom et al. (2015)	10
Acetochlor OA	194992-44-4	Pesticide	Herbicide	USGS NWQL	direct injection LC-MS/MS	Sandstrom et al. (2015)	65
Acetochlor SA	187022-11-3	Pesticide	Herbicide	USGS NWQL	direct injection LC-MS/MS	Sandstrom et al. (2015)	320
Atrazine2	1912-24-9	Pesticide	Herbicide	USGS NWQL	direct injection LC-MS/MS	Sandstrom et al. (2015)	20
Atrazine2	1912-24-9	Pesticide	Herbicide	USGS NWQL	direct injection LC-MS/MS	Furlong et al. (2014)	20
Azoxystrobin	131860-33-8	Pesticide	Fungicide	USGS NWQL	direct injection LC-MS/MS	Sandstrom et al. (2015)	3
Bentazon	25057-89-0	Pesticide	Herbicide	USGS NWQL	direct injection LC-MS/MS	Sandstrom et al. (2015)	9
Bromacil	314-40-9	Pesticide	Herbicide	USGS NWQL	direct injection LC-MS/MS	Sandstrom et al. (2015)	5.6
Bromoxynil	1689-84-5	Pesticide	Herbicide	USGS NWQL	direct injection LC-MS/MS	Sandstrom et al. (2015)	60
Carbaryl	63-25-2	Pesticide	Insecticide	USGS NWQL	direct injection LC-MS/MS	Sandstrom et al. (2015)	5.6
Carbendazim	10605-21-7	Pesticide	Fungicide	USGS NWQL	direct injection LC-MS/MS	Sandstrom et al. (2015)	10
Chlorimuron-ethyl	90982-32-4	Pesticide	Herbicide	USGS NWQL	direct injection LC-MS/MS	Sandstrom et al. (2015)	8.8
Chlorpyrifos	2921-88-2	Pesticide	Insecticide	USGS NWQL	direct injection LC-MS/MS	Sandstrom et al. (2015)	3
cis-Cyhalothric acid	68127-59-3	Pesticide	Insecticide	USGS NWQL	direct injection LC-MS/MS	Sandstrom et al. (2015)	105
cis-Permethrin	61949-76-6	Pesticide	Insecticide	USGS NWQL	direct injection LC-MS/MS	Sandstrom et al. (2015)	4.2
Dechlorometolachlor	126605-22-9	Pesticide	Herbicide	USGS NWQL	direct injection LC-MS/MS	Sandstrom et al. (2015)	2
Deethylatrazine (CIAT)	6190-65-4	Pesticide	Herbicide	USGS NWQL	direct injection LC-MS/MS	Sandstrom et al. (2015)	11
Deisopropylatrazine (CEAT)	1007-28-9	Pesticide	Herbicide	USGS NWQL	direct injection LC-MS/MS	Sandstrom et al. (2015)	20
Desulfinylfipronil	205650-65-3	Pesticide	Insecticide	USGS NWQL	direct injection LC-MS/MS	Sandstrom et al. (2015)	3.8
Diazinon	333-41-5	Pesticide	Insecticide	USGS NWQL	direct injection LC-MS/MS	Sandstrom et al. (2015)	6.4
Dicamba	1918-00-9	Pesticide	Herbicide	USGS NWQL	direct injection LC-MS/MS	Sandstrom et al. (2015)	800
Dichlorvos	--	Pesticide	Antacid	USGS NWQL	direct injection LC-MS/MS	Sandstrom et al. (2015)	52
Dicrotophos	141-66-2	Pesticide	Insecticide	USGS NWQL	direct injection LC-MS/MS	Sandstrom et al. (2015)	4
Didealkylatrazine (CAAT)	3397-62-4	Pesticide	Herbicide	USGS NWQL	direct injection LC-MS/MS	Sandstrom et al. (2015)	24
Diflubenzuron	35367-38-5	Pesticide	Insecticide	USGS NWQL	direct injection LC-MS/MS	Sandstrom et al. (2015)	6
Diketonitrile-isoxaflutole	143701-75-1	Pesticide	Herbicide	USGS NWQL	direct injection LC-MS/MS	Sandstrom et al. (2015)	10
Dimethenamid	87674-68-8	Pesticide	Herbicide	USGS NWQL	direct injection LC-MS/MS	Sandstrom et al. (2015)	3
Dimethoate	60-51-5	Pesticide	Insecticide	USGS NWQL	direct injection LC-MS/MS	Sandstrom et al. (2015)	4.6
Diuron	330-54-1	Pesticide	Herbicide	USGS NWQL	direct injection LC-MS/MS	Sandstrom et al. (2015)	5
Ethoprop	13194-48-4	Pesticide	Insecticide	USGS NWQL	direct injection LC-MS/MS	Sandstrom et al. (2015)	5
Etoxazole	153233-91-1	Pesticide	Insecticide	USGS NWQL	direct injection LC-MS/MS	Sandstrom et al. (2015)	4.2
Fipronil	120068-37-3	Pesticide	Insecticide	USGS NWQL	direct injection LC-MS/MS	Sandstrom et al. (2015)	4
Fipronil amide	205650-69-7	Pesticide	Insecticide	USGS NWQL	direct injection LC-MS/MS	Sandstrom et al. (2015)	9.2
Fipronil sulfide	120067-83-6	Pesticide	Insecticide	USGS NWQL	direct injection LC-MS/MS	Sandstrom et al. (2015)	4.2
Fipronil sulfone	120068-36-2	Pesticide	Insecticide	USGS NWQL	direct injection LC-MS/MS	Sandstrom et al. (2015)	5.6
Fluometuron	2164-17-2	Pesticide	Herbicide	USGS NWQL	direct injection LC-MS/MS	Sandstrom et al. (2015)	10
Halosulfuron methyl	100784-20-1	Pesticide	Herbicide	USGS NWQL	direct injection LC-MS/MS	Sandstrom et al. (2015)	12
Hexazinone	51235-04-2	Pesticide	Herbicide	USGS NWQL	direct injection LC-MS/MS	Sandstrom et al. (2015)	3.6
Hydroxymetolachlor	131068-72-9	Pesticide	Herbicide	USGS NWQL	direct injection LC-MS/MS	Sandstrom et al. (2015)	2.4
Hydroxysimazine	2599-11-3	Pesticide	Herbicide	USGS NWQL	direct injection LC-MS/MS	Sandstrom et al. (2015)	120
Imazethapyr	81335-77-5	Pesticide	Herbicide	USGS NWQL	direct injection LC-MS/MS	Sandstrom et al. (2015)	8
Imidacloprid	138261-41-3	Pesticide	Insecticide	USGS NWQL	direct injection LC-MS/MS	Sandstrom et al. (2015)	16
Linuron	330-55-2	Pesticide	Herbicide	USGS NWQL	direct injection LC-MS/MS	Sandstrom et al. (2015)	5.6
Malathion	121-75-5	Pesticide	Insecticide	USGS NWQL	direct injection LC-MS/MS	Sandstrom et al. (2015)	5.4
Metalaxyl	57837-19-1	Pesticide	Fungicide	USGS NWQL	direct injection LC-MS/MS	Sandstrom et al. (2015)	6
Metconazole	125116-23-6	Pesticide	Fungicide	USGS NWQL	direct injection LC-MS/MS	Sandstrom et al. (2015)	5
Methamidophos	10265-92-6	Pesticide	Insecticide	USGS NWQL	direct injection LC-MS/MS	Sandstrom et al. (2015)	10
Methomyl	16752-77-5	Pesticide	Insecticide	USGS NWQL	direct injection LC-MS/MS	Sandstrom et al. (2015)	3
Methoxyfenozide	161050-58-4	Pesticide	Insecticide	USGS NWQL	direct injection LC-MS/MS	Sandstrom et al. (2015)	2.2
Metolachlor	51218-45-2	Pesticide	Herbicide	USGS NWQL	direct injection LC-MS/MS	Sandstrom et al. (2015)	3.2
Metolachlor OA	152019-73-3	Pesticide	Herbicide	USGS NWQL	direct injection LC-MS/MS	Sandstrom et al. (2015)	149
Metolachlor SA	171118-09-5	Pesticide	Herbicide	USGS NWQL	direct injection LC-MS/MS	Sandstrom et al. (2015)	68
Metribuzin	21087-64-9	Pesticide	Herbicide	USGS NWQL	direct injection LC-MS/MS	Sandstrom et al. (2015)	20
Myclobutanil	88671-89-0	Pesticide	Fungicide	USGS NWQL	direct injection LC-MS/MS	Sandstrom et al. (2015)	7
N-(3-4-Dichlorophenyl)-N-methylurea (DCPMU)	3567-62-2	Pesticide	Herbicide	USGS NWQL	direct injection LC-MS/MS	Sandstrom et al. (2015)	5
Oryzalin	19044-88-3	Pesticide	Herbicide	USGS NWQL	direct injection LC-MS/MS	Sandstrom et al. (2015)	12
Piperonyl butoxide2	51-03-6	Pesticide	Insecticide	USGS NWQL	direct injection LC-MS/MS	Sandstrom et al. (2015)	25
Prometon	1610-18-0	Pesticide	Herbicide	USGS NWQL	direct injection LC-MS/MS	Sandstrom et al. (2015)	4
Propazine	139-40-2	Pesticide	Herbicide	USGS NWQL	direct injection LC-MS/MS	Sandstrom et al. (2015)	3.2
Propiconazole	60207-90-1	Pesticide	Fungicide	USGS NWQL	direct injection LC-MS/MS	Sandstrom et al. (2015)	6
Propoxur	114-26-1	Pesticide	Insecticide	USGS NWQL	direct injection LC-MS/MS	Sandstrom et al. (2015)	3.2
Pyraclostrobin	175013-18-0	Pesticide	Fungicide	USGS NWQL	direct injection LC-MS/MS	Sandstrom et al. (2015)	2.4
Simazine	122-34-9	Pesticide	Herbicide	USGS NWQL	direct injection LC-MS/MS	Sandstrom et al. (2015)	7.2
Sulfentrazone	122836-35-5	Pesticide	Herbicide	USGS NWQL	direct injection LC-MS/MS	Sandstrom et al. (2015)	18
Sulfometuron-methyl	74222-97-2	Pesticide	Herbicide	USGS NWQL	direct injection LC-MS/MS	Sandstrom et al. (2015)	4
Tebuconazole	107534-96-3	Pesticide	Fungicide	USGS NWQL	direct injection LC-MS/MS	Sandstrom et al. (2015)	15
Tebupirimfos	96182-53-5	Pesticide	Insecticide	USGS NWQL	direct injection LC-MS/MS	Sandstrom et al. (2015)	2
Tebuthiuron	34014-18-1	Pesticide	Herbicide	USGS NWQL	direct injection LC-MS/MS	Sandstrom et al. (2015)	3
Terbufos	13071-79-9	Pesticide	Insecticide	USGS NWQL	direct injection LC-MS/MS	Sandstrom et al. (2015)	6.8
Terbufos oxon sulfone	56070-15-6	Pesticide	Insecticide	USGS NWQL	direct injection LC-MS/MS	Sandstrom et al. (2015)	32
Terbufos oxon sulfoxide	56165-57-2	Pesticide	Insecticide	USGS NWQL	direct injection LC-MS/MS	Sandstrom et al. (2015)	3
Tetraconazole	112281-77-3	Pesticide	Fungicide	USGS NWQL	direct injection LC-MS/MS	Sandstrom et al. (2015)	7
Thiobencarb	28249-77-6	Pesticide	Herbicide	USGS NWQL	direct injection LC-MS/MS	Sandstrom et al. (2015)	4.2
trans-Permethrin	61949-77-7	Pesticide	Insecticide	USGS NWQL	direct injection LC-MS/MS	Sandstrom et al. (2015)	3.8
Triclopyr	55335-06-3	Pesticide	Herbicide/Fungicide	USGS NWQL	direct injection LC-MS/MS	Sandstrom et al. (2015)	88
Trifloxystrobin	141517-21-7	Pesticide	Fungicide	USGS NWQL	direct injection LC-MS/MS	Sandstrom et al. (2015)	2.8
2-4-D-d3	202480-67-9	Pesticide surrogate	--	USGS NWQL	direct injection LC-MS/MS	Sandstrom et al. (2015)	--
3-Phenoxybenzoic acid-13C6	--	Pesticide surrogate	--	USGS NWQL	direct injection LC-MS/MS	Sandstrom et al. (2015)	--
Acetochlor-d11	1189897-44-6	Pesticide surrogate	--	USGS NWQL	direct injection LC-MS/MS	Sandstrom et al. (2015)	--
Alachlor-d13	1015856-63-9	Pesticide surrogate	--	USGS NWQL	direct injection LC-MS/MS	Sandstrom et al. (2015)	--
Butachlor SA	187022-12-4	Pesticide surrogate	--	USGS NWQL	direct injection LC-MS/MS	Sandstrom et al. (2015)	--
Carbaryl-d7	362049-56-7	Pesticide surrogate	--	USGS NWQL	direct injection LC-MS/MS	Sandstrom et al. (2015)	--
Carbendazim-d4	291765-95-2	Pesticide surrogate	--	USGS NWQL	direct injection LC-MS/MS	Sandstrom et al. (2015)	--
Carbofuran-d3	1007459-98-4	Pesticide surrogate	--	USGS NWQL	direct injection LC-MS/MS	Sandstrom et al. (2015)	--
cis-Permethrin-13C6	--	Pesticide surrogate	--	USGS NWQL	direct injection LC-MS/MS	Sandstrom et al. (2015)	--
Deethylatrazine-d6	--	Pesticide surrogate	--	USGS NWQL	direct injection LC-MS/MS	Sandstrom et al. (2015)	--
Diazinon-d10	100155-47-3	Pesticide surrogate	--	USGS NWQL	direct injection LC-MS/MS	Sandstrom et al. (2015)	--
Diflubenzuron-d4 (4-chlorophenyl-d4)	1219795-45-5	Pesticide surrogate	--	USGS NWQL	direct injection LC-MS/MS	Sandstrom et al. (2015)	--
Dimethachlor SA	--	Pesticide surrogate	--	USGS NWQL	direct injection LC-MS/MS	Sandstrom et al. (2015)	--
Diuron-d6	--	Pesticide surrogate	--	USGS NWQL	direct injection LC-MS/MS	Sandstrom et al. (2015)	--
Hexazinone-d6	1219804-22-4	Pesticide surrogate	--	USGS NWQL	direct injection LC-MS/MS	Sandstrom et al. (2015)	--
Linuron-d6	1219804-76-8	Pesticide surrogate	--	USGS NWQL	direct injection LC-MS/MS	Sandstrom et al. (2015)	--
Malathion-d10	347841-48-9	Pesticide surrogate	--	USGS NWQL	direct injection LC-MS/MS	Sandstrom et al. (2015)	--
Metolachlor-d6	1219803-97-0	Pesticide surrogate	--	USGS NWQL	direct injection LC-MS/MS	Sandstrom et al. (2015)	--
Nicosulfuron-d6	1189419-41-7	Pesticide surrogate	--	USGS NWQL	direct injection LC-MS/MS	Sandstrom et al. (2015)	--
Tebuconazole-d6	--	Pesticide surrogate	--	USGS NWQL	direct injection LC-MS/MS	Sandstrom et al. (2015)	--
Thiobencarb-d10	1219804-12-2	Pesticide surrogate	--	USGS NWQL	direct injection LC-MS/MS	Sandstrom et al. (2015)	--
10-Hydroxy-amitriptyline	64520-05-4	Pharmaceutical	Antidepressant	USGS NWQL	direct injection LC-MS/MS	Furlong et al. (2014)	8.3
1-7-Dimethylxanthine	611-59-6	Pharmaceutical	Stimulant	USGS NWQL	direct injection LC-MS/MS	Furlong et al. (2014)	88
Abacavir	136470-78-5	Pharmaceutical	Antiviral	USGS NWQL	direct injection LC-MS/MS	Furlong et al. (2014)	2
Acetaminophen	103-90-2	Pharmaceutical	Analgesic	USGS NWQL	direct injection LC-MS/MS	Furlong et al. (2014)	84
Acyclovir	59277-89-3	Pharmaceutical	Antiviral	USGS NWQL	direct injection LC-MS/MS	Furlong et al. (2014)	22
Albuterol	18559-94-9	Pharmaceutical	Bronchodilator	USGS NWQL	direct injection LC-MS/MS	Furlong et al. (2014)	6.7
Alprazolam	28981-97-7	Pharmaceutical	Sedative	USGS NWQL	direct injection LC-MS/MS	Furlong et al. (2014)	21
Amitriptyline	50-48-6	Pharmaceutical	Antidepressant	USGS NWQL	direct injection LC-MS/MS	Furlong et al. (2014)	37
Amphetamine	300-62-9	Pharmaceutical	Stimulant	USGS NWQL	direct injection LC-MS/MS	Furlong et al. (2014)	4.4
Antipyrine	60-80-0	Pharmaceutical	Analgesic	USGS NWQL	direct injection LC-MS/MS	Furlong et al. (2014)	50
Atenolol	29122-68-7	Pharmaceutical	Beta blocker	USGS NWQL	direct injection LC-MS/MS	Furlong et al. (2014)	13
Benztropine	86-13-5	Pharmaceutical	Miscellaneous	USGS NWQL	direct injection LC-MS/MS	Furlong et al. (2014)	44
Betamethasone	378-44-9	Pharmaceutical	Corticosteroid	USGS NWQL	direct injection LC-MS/MS	Furlong et al. (2014)	114
Bupropion	34911-55-2	Pharmaceutical	Antidepressant	USGS NWQL	direct injection LC-MS/MS	Furlong et al. (2014)	18
Caffeine	58-08-2	Pharmaceutical	Stimulant	USGS NWQL	direct injection LC-MS/MS	Furlong et al. (2014)	91
Carbamazepine	298-46-4	Pharmaceutical	Anticonvulsant	USGS NWQL	direct injection LC-MS/MS	Furlong et al. (2014)	11
Carisoprodol	78-44-4	Pharmaceutical	MuscleRelaxer	USGS NWQL	direct injection LC-MS/MS	Furlong et al. (2014)	20
Chlorpheniramine	132-22-9	Pharmaceutical	Antihistamine	USGS NWQL	direct injection LC-MS/MS	Furlong et al. (2014)	54
Cimetidine	51481-61-9	Pharmaceutical	Antacid	USGS NWQL	direct injection LC-MS/MS	Furlong et al. (2014)	140
Citalopram	59729-33-8	Pharmaceutical	Antidepressant	USGS NWQL	direct injection LC-MS/MS	Furlong et al. (2014)	6.6
Clonidine	4205-90-7	Pharmaceutical	Sedative	USGS NWQL	direct injection LC-MS/MS	Furlong et al. (2014)	61
Codeine	76-57-3	Pharmaceutical	Opiate	USGS NWQL	direct injection LC-MS/MS	Furlong et al. (2014)	32
Cotinine	486-56-6	Pharmaceutical	Stimulant	USGS NWQL	direct injection LC-MS/MS	Furlong et al. (2014)	6.4
Dehydronifedipine	67035-22-7	Pharmaceutical	Ca channel blocker	USGS NWQL	direct injection LC-MS/MS	Furlong et al. (2014)	20
Desmethyldiltiazem	--	Pharmaceutical	Antacid	USGS NWQL	direct injection LC-MS/MS	Furlong et al. (2014)	70
Desvenlafaxine	93413-62-8	Pharmaceutical	Antidepressant	USGS NWQL	direct injection LC-MS/MS	Furlong et al. (2014)	84
Dextromethorphan	125-71-3	Pharmaceutical	Miscellaneous	USGS NWQL	direct injection LC-MS/MS	Furlong et al. (2014)	8.2
Diazepam	439-14-5	Pharmaceutical	Sedative	USGS NWQL	direct injection LC-MS/MS	Furlong et al. (2014)	4
Diltiazem	42399-41-7	Pharmaceutical	Ca channel blocker	USGS NWQL	direct injection LC-MS/MS	Furlong et al. (2014)	10
Diphenhydramine	147-24-0	Pharmaceutical	Antihistamine	USGS NWQL	direct injection LC-MS/MS	Furlong et al. (2014)	48
Duloxetine	116539-59-4	Pharmaceutical	Antidepressant	USGS NWQL	direct injection LC-MS/MS	Furlong et al. (2014)	37
Erythromycin	114-07-8	Pharmaceutical	Antibiotic	USGS NWQL	direct injection LC-MS/MS	Furlong et al. (2014)	80
Ezetimibe	163222-33-1	Pharmaceutical	Cholesterol	USGS NWQL	direct injection LC-MS/MS	Furlong et al. (2014)	205
Fadrozole	102676-47-1	Pharmaceutical	Miscellaneous	USGS NWQL	direct injection LC-MS/MS	Furlong et al. (2014)	13
Famotidine	76824-35-6	Pharmaceutical	Antacid	USGS NWQL	direct injection LC-MS/MS	Furlong et al. (2014)	34
Fenofibrate	49562-28-9	Pharmaceutical	Cholesterol	USGS NWQL	direct injection LC-MS/MS	Furlong et al. (2014)	6.4
Fexofenadine	83799-24-0	Pharmaceutical	Antihistamine	USGS NWQL	direct injection LC-MS/MS	Furlong et al. (2014)	44
Fluconazole	86386-73-4	Pharmaceutical	Antifungal	USGS NWQL	direct injection LC-MS/MS	Furlong et al. (2014)	30
Fluoxetine	54910-89-3	Pharmaceutical	Antidepressant	USGS NWQL	direct injection LC-MS/MS	Furlong et al. (2014)	26
Fluticasone propionate	80474-14-2	Pharmaceutical	Corticosteroid	USGS NWQL	direct injection LC-MS/MS	Furlong et al. (2014)	30
Fluvoxamine	54739-18-3	Pharmaceutical	Antidepressant	USGS NWQL	direct injection LC-MS/MS	Furlong et al. (2014)	80
Gabapentin	60142-96-3	Pharmaceutical	Anticonvulsant	USGS NWQL	direct injection LC-MS/MS	Furlong et al. (2014)	160
Glipizide	29094-61-9	Pharmaceutical	Antidiabetic	USGS NWQL	direct injection LC-MS/MS	Furlong et al. (2014)	80
Glyburide	10238-21-8	Pharmaceutical	Antidiabetic	USGS NWQL	direct injection LC-MS/MS	Furlong et al. (2014)	4
Guanylurea	141-83-3	Pharmaceutical	Antidiabetic	USGS NWQL	direct injection LC-MS/MS	Furlong et al. (2014)	140
Hexamethylenetetramine	100-97-0	Pharmaceutical	Anibiotic	USGS NWQL	direct injection LC-MS/MS	Furlong et al. (2014)	55
Hydrocodone	125-29-1	Pharmaceutical	Opiate	USGS NWQL	direct injection LC-MS/MS	Furlong et al. (2014)	40
Hydrocortisone	50-23-7	Pharmaceutical	Corticosteroid	USGS NWQL	direct injection LC-MS/MS	Furlong et al. (2014)	147
Hydroxyzine	68-88-2	Pharmaceutical	Antihistamine	USGS NWQL	direct injection LC-MS/MS	Furlong et al. (2014)	7.4
Iminostilbene	256-96-2	Pharmaceutical	Anticonvulsant	USGS NWQL	direct injection LC-MS/MS	Furlong et al. (2014)	145
Ketoconazole	65277-42-1	Pharmaceutical	Antifungal	USGS NWQL	direct injection LC-MS/MS	Furlong et al. (2014)	113
Lamivudine	134678-17-4	Pharmaceutical	Antiviral	USGS NWQL	direct injection LC-MS/MS	Furlong et al. (2014)	16
Lidocaine	137-58-6	Pharmaceutical	Miscellaneous	USGS NWQL	direct injection LC-MS/MS	Furlong et al. (2014)	4
Loperamide	53179-11-6	Pharmaceutical	Miscellaneous	USGS NWQL	direct injection LC-MS/MS	Furlong et al. (2014)	80
Loratadine	79794-75-5	Pharmaceutical	Antihistamine	USGS NWQL	direct injection LC-MS/MS	Furlong et al. (2014)	7
Lorazepam	846-49-1	Pharmaceutical	Benzodiazepine	USGS NWQL	direct injection LC-MS/MS	Furlong et al. (2014)	202
Meprobamate	57-53-4	Pharmaceutical	Miscellaneous	USGS NWQL	direct injection LC-MS/MS	Furlong et al. (2014)	12
Metaxalone	1665-48-1	Pharmaceutical	MuscleRelaxer	USGS NWQL	direct injection LC-MS/MS	Furlong et al. (2014)	16
Metformin	657-24-9	Pharmaceutical	Antidiabetic	USGS NWQL	direct injection LC-MS/MS	Furlong et al. (2014)	13
Methadone	76-99-3	Pharmaceutical	Opiate	USGS NWQL	direct injection LC-MS/MS	Furlong et al. (2014)	7.6
Methocarbamol	532-03-6	Pharmaceutical	MuscleRelaxer	USGS NWQL	direct injection LC-MS/MS	Furlong et al. (2014)	11
Methotrexate	59-05-2	Pharmaceutical	Miscellaneous	USGS NWQL	direct injection LC-MS/MS	Furlong et al. (2014)	52
Metoprolol	51384-51-1	Pharmaceutical	Beta blocker	USGS NWQL	direct injection LC-MS/MS	Furlong et al. (2014)	10
Morphine	57-27-2	Pharmaceutical	Opiate	USGS NWQL	direct injection LC-MS/MS	Furlong et al. (2014)	80
Nadolol	42200-33-9	Pharmaceutical	Beta blocker	USGS NWQL	direct injection LC-MS/MS	Furlong et al. (2014)	20
Nevirapine	129618-40-2	Pharmaceutical	Antiviral	USGS NWQL	direct injection LC-MS/MS	Furlong et al. (2014)	46
Nicotine	54-11-5	Pharmaceutical	Stimulant	USGS NWQL	direct injection LC-MS/MS	Furlong et al. (2014)	58
Nizatidine	76963-41-2	Pharmaceutical	Antacid	USGS NWQL	direct injection LC-MS/MS	Furlong et al. (2014)	80
Nordiazepam	1088-11-5	Pharmaceutical	Benzodiazepine	USGS NWQL	direct injection LC-MS/MS	Furlong et al. (2014)	20
Norethindrone	68-22-4	Pharmaceutical	Miscellaneous	USGS NWQL	direct injection LC-MS/MS	Furlong et al. (2014)	20
Norfluoxetine	56161-73-0	Pharmaceutical	Antidepressant	USGS NWQL	direct injection LC-MS/MS	Furlong et al. (2014)	80
Norsertraline	87857-41-8	Pharmaceutical	Antidepressant	USGS NWQL	direct injection LC-MS/MS	Furlong et al. (2014)	80
Norverapamil	67018-85-3	Pharmaceutical	Ca channel blocker	USGS NWQL	direct injection LC-MS/MS	Furlong et al. (2014)	8.6
Omeprazole+Esomeprazole	--	Pharmaceutical	Antacid	USGS NWQL	direct injection LC-MS/MS	Furlong et al. (2014)	16
Oseltamivir	196618-13-0	Pharmaceutical	Antiviral	USGS NWQL	direct injection LC-MS/MS	Furlong et al. (2014)	15
Oxazepam	604-75-1	Pharmaceutical	Sedative	USGS NWQL	direct injection LC-MS/MS	Furlong et al. (2014)	226
Oxycodone	76-42-6	Pharmaceutical	Opiate	USGS NWQL	direct injection LC-MS/MS	Furlong et al. (2014)	25
Paroxetine	61869-08-7	Pharmaceutical	Antidepressant	USGS NWQL	direct injection LC-MS/MS	Furlong et al. (2014)	72
Penciclovir	39809-25-1	Pharmaceutical	Antiviral	USGS NWQL	direct injection LC-MS/MS	Furlong et al. (2014)	80
Pentoxifylline	6493-05-6	Pharmaceutical	Miscellaneous	USGS NWQL	direct injection LC-MS/MS	Furlong et al. (2014)	9.4
Phenazopyridine	94-78-0	Pharmaceutical	Analgesic	USGS NWQL	direct injection LC-MS/MS	Furlong et al. (2014)	13
Phendimetrazine	634-03-7	Pharmaceutical	Stimulant	USGS NWQL	direct injection LC-MS/MS	Furlong et al. (2014)	20
Phenytoin	57-41-0	Pharmaceutical	Anticonvulsant	USGS NWQL	direct injection LC-MS/MS	Furlong et al. (2014)	188
Piperonyl butoxide2	51-03-6	Pharmaceutical	Miscellaneous	USGS NWQL	direct injection LC-MS/MS	Furlong et al. (2014)	60
Prednisolone	50-24-8	Pharmaceutical	Corticosteroid	USGS NWQL	direct injection LC-MS/MS	Furlong et al. (2014)	150
Prednisone	53-03-2	Pharmaceutical	Corticosteroid	USGS NWQL	direct injection LC-MS/MS	Furlong et al. (2014)	105
Promethazine	60-87-7	Pharmaceutical	Antihistamine	USGS NWQL	direct injection LC-MS/MS	Furlong et al. (2014)	114
Propoxyphene	469-62-5	Pharmaceutical	Opiate	USGS NWQL	direct injection LC-MS/MS	Furlong et al. (2014)	28
Propranolol	525-66-6	Pharmaceutical	Beta blocker	USGS NWQL	direct injection LC-MS/MS	Furlong et al. (2014)	26
Pseudoephedrine+Ephedrine	--	Pharmaceutical	Antacid	USGS NWQL	direct injection LC-MS/MS	Furlong et al. (2014)	6
Quinine	130-95-0	Pharmaceutical	Miscellaneous	USGS NWQL	direct injection LC-MS/MS	Furlong et al. (2014)	80
Ractopamine	97825-25-7	Pharmaceutical	Miscellaneous	USGS NWQL	direct injection LC-MS/MS	Furlong et al. (2014)	20
Raloxifene	84449-90-1	Pharmaceutical	SERM	USGS NWQL	direct injection LC-MS/MS	Furlong et al. (2014)	80
Ranitidine	66357-35-5	Pharmaceutical	Antacid	USGS NWQL	direct injection LC-MS/MS	Furlong et al. (2014)	192
Sertraline	79617-96-2	Pharmaceutical	Antidepressant	USGS NWQL	direct injection LC-MS/MS	Furlong et al. (2014)	16
Sitagliptin	486460-32-6	Pharmaceutical	Antidiabetic	USGS NWQL	direct injection LC-MS/MS	Furlong et al. (2014)	97
Sulfadimethoxine	122-11-2	Pharmaceutical	Antibiotic	USGS NWQL	direct injection LC-MS/MS	Furlong et al. (2014)	14
Sulfamethizole	144-82-1	Pharmaceutical	Antibiotic	USGS NWQL	direct injection LC-MS/MS	Furlong et al. (2014)	104
Sulfamethoxazole	723-46-6	Pharmaceutical	Antibiotic	USGS NWQL	direct injection LC-MS/MS	Furlong et al. (2014)	20
Tamoxifen	10540-29-1	Pharmaceutical	SERM	USGS NWQL	direct injection LC-MS/MS	Furlong et al. (2014)	270
Temazepam	846-50-4	Pharmaceutical	Sedative	USGS NWQL	direct injection LC-MS/MS	Furlong et al. (2014)	18
Theophylline	58-55-9	Pharmaceutical	Bronchodilator	USGS NWQL	direct injection LC-MS/MS	Furlong et al. (2014)	80
Thiabendazole	148-79-8	Pharmaceutical	Miscellaneous	USGS NWQL	direct injection LC-MS/MS	Furlong et al. (2014)	4
Tiotropium	186691-13-4	Pharmaceutical	Bronchodilator	USGS NWQL	direct injection LC-MS/MS	Furlong et al. (2014)	50
Tramadol	27203-92-5	Pharmaceutical	Opiate	USGS NWQL	direct injection LC-MS/MS	Furlong et al. (2014)	7.4
Triamterene	396-01-0	Pharmaceutical	Miscellaneous	USGS NWQL	direct injection LC-MS/MS	Furlong et al. (2014)	5.2
Trimethoprim	738-70-5	Pharmaceutical	Antibiotic	USGS NWQL	direct injection LC-MS/MS	Furlong et al. (2014)	20
Valacyclovir	124832-26-4	Pharmaceutical	Antiviral	USGS NWQL	direct injection LC-MS/MS	Furlong et al. (2014)	163
Venlafaxine	93413-69-5	Pharmaceutical	Antidepressant	USGS NWQL	direct injection LC-MS/MS	Furlong et al. (2014)	5.2
Verapamil	52-53-9	Pharmaceutical	Ca channel blocker	USGS NWQL	direct injection LC-MS/MS	Furlong et al. (2014)	140
Warfarin	81-81-2	Pharmaceutical	Miscellaneous	USGS NWQL	direct injection LC-MS/MS	Furlong et al. (2014)	6
Acetaminophen-d3	--	Pharmaceutical surrogate	--	USGS NWQL	direct injection LC-MS/MS	Furlong et al. (2014)	--
Albuterol-d9	--	Pharmaceutical surrogate	--	USGS NWQL	direct injection LC-MS/MS	Furlong et al. (2014)	--
Amitriptyline-d3	--	Pharmaceutical surrogate	--	USGS NWQL	direct injection LC-MS/MS	Furlong et al. (2014)	--
Amphetamine-d6	--	Pharmaceutical surrogate	--	USGS NWQL	direct injection LC-MS/MS	Furlong et al. (2014)	--
Caffeine-(trimethyl-13C3)	--	Pharmaceutical surrogate	--	USGS NWQL	direct injection LC-MS/MS	Furlong et al. (2014)	--
Carisoprodol-d7	1218911-16-0	Pharmaceutical surrogate	--	USGS NWQL	direct injection LC-MS/MS	Furlong et al. (2014)	--
Codeine-d6	371151-94-9	Pharmaceutical surrogate	--	USGS NWQL	direct injection LC-MS/MS	Furlong et al. (2014)	--
Cotinine-d3	--	Pharmaceutical surrogate	--	USGS NWQL	direct injection LC-MS/MS	Furlong et al. (2014)	--
Desmethyldiltiazem-d4	--	Pharmaceutical surrogate	--	USGS NWQL	direct injection LC-MS/MS	Furlong et al. (2014)	--
Diazepam-d5	65854-76-4	Pharmaceutical surrogate	--	USGS NWQL	direct injection LC-MS/MS	Furlong et al. (2014)	--
Diltiazem-d3	--	Pharmaceutical surrogate	--	USGS NWQL	direct injection LC-MS/MS	Furlong et al. (2014)	--
Diphenhydramine-d3	--	Pharmaceutical surrogate	--	USGS NWQL	direct injection LC-MS/MS	Furlong et al. (2014)	--
Erythromycin-13C-d3	959119-26-7	Pharmaceutical surrogate	--	USGS NWQL	direct injection LC-MS/MS	Furlong et al. (2014)	--
Ezetimibe-d4	1093659-90-5	Pharmaceutical surrogate	--	USGS NWQL	direct injection LC-MS/MS	Furlong et al. (2014)	--
Fenofibrate-d6	1092484-56-4	Pharmaceutical surrogate	--	USGS NWQL	direct injection LC-MS/MS	Furlong et al. (2014)	--
Fexofenadine-d10	1215900-18-7	Pharmaceutical surrogate	--	USGS NWQL	direct injection LC-MS/MS	Furlong et al. (2014)	--
Fluoxetine-d6	--	Pharmaceutical surrogate	--	USGS NWQL	direct injection LC-MS/MS	Furlong et al. (2014)	--
Fluvoxamine-d4	--	Pharmaceutical surrogate	--	USGS NWQL	direct injection LC-MS/MS	Furlong et al. (2014)	--
Hydrocodone-d3	--	Pharmaceutical surrogate	--	USGS NWQL	direct injection LC-MS/MS	Furlong et al. (2014)	--
Hydrocortisone-13C3	--	Pharmaceutical surrogate	--	USGS NWQL	direct injection LC-MS/MS	Furlong et al. (2014)	--
Ketoconazole-d4	--	Pharmaceutical surrogate	--	USGS NWQL	direct injection LC-MS/MS	Furlong et al. (2014)	--
Loperamide-d6	--	Pharmaceutical surrogate	--	USGS NWQL	direct injection LC-MS/MS	Furlong et al. (2014)	--
Loratadine-d4	--	Pharmaceutical surrogate	--	USGS NWQL	direct injection LC-MS/MS	Furlong et al. (2014)	--
Lorazepam-d4	84344-15-0	Pharmaceutical surrogate	--	USGS NWQL	direct injection LC-MS/MS	Furlong et al. (2014)	--
Metformin-d6	--	Pharmaceutical surrogate	--	USGS NWQL	direct injection LC-MS/MS	Furlong et al. (2014)	--
Methadone-d9	--	Pharmaceutical surrogate	--	USGS NWQL	direct injection LC-MS/MS	Furlong et al. (2014)	--
Norfluoxetine-d6	--	Pharmaceutical surrogate	--	USGS NWQL	direct injection LC-MS/MS	Furlong et al. (2014)	--
Oxazepam-d5	65854-78-6	Pharmaceutical surrogate	--	USGS NWQL	direct injection LC-MS/MS	Furlong et al. (2014)	--
Oxycodone-d3	--	Pharmaceutical surrogate	--	USGS NWQL	direct injection LC-MS/MS	Furlong et al. (2014)	--
Promethazine-d6	--	Pharmaceutical surrogate	--	USGS NWQL	direct injection LC-MS/MS	Furlong et al. (2014)	--
Propoxyphene-d11	--	Pharmaceutical surrogate	--	USGS NWQL	direct injection LC-MS/MS	Furlong et al. (2014)	--
Pseudoephedrine-d3	--	Pharmaceutical surrogate	--	USGS NWQL	direct injection LC-MS/MS	Furlong et al. (2014)	--
Raloxifene-d10	--	Pharmaceutical surrogate	--	USGS NWQL	direct injection LC-MS/MS	Furlong et al. (2014)	--
Ranitidine-d6	--	Pharmaceutical surrogate	--	USGS NWQL	direct injection LC-MS/MS	Furlong et al. (2014)	--
Sulfamethoxazole-(phenyl13C6)	--	Pharmaceutical surrogate	--	USGS NWQL	direct injection LC-MS/MS	Furlong et al. (2014)	--
Tamoxifen-d5	157698-32-3	Pharmaceutical surrogate	--	USGS NWQL	direct injection LC-MS/MS	Furlong et al. (2014)	--
Temazepam-d5	--	Pharmaceutical surrogate	--	USGS NWQL	direct injection LC-MS/MS	Furlong et al. (2014)	--
Thiabendazole-d4	--	Pharmaceutical surrogate	--	USGS NWQL	direct injection LC-MS/MS	Furlong et al. (2014)	--
Tiotropium-d3	--	Pharmaceutical surrogate	--	USGS NWQL	direct injection LC-MS/MS	Furlong et al. (2014)	--
Trimethoprim-d9	--	Pharmaceutical surrogate	--	USGS NWQL	direct injection LC-MS/MS	Furlong et al. (2014)	--
Verapamil-d6	--	Pharmaceutical surrogate	--	USGS NWQL	direct injection LC-MS/MS	Furlong et al. (2014)	--
3-beta-Coprostanol	360-68-9	Sterol	--	USGS NWQL	GC-MS/MS	Foreman et al. (2012)	200
Cholesterol	57-88-5	Sterol	--	USGS NWQL	GC-MS/MS	Foreman et al. (2012)	400
1Methylbenzotriazole is included in the pharmaceutical schedule but was not classified as a pharmaceutical for our analysis. The corrosion inhibitor class includes only this chemical, for this study.
2Atrazine and piperonyl butoxide are included in both the pesticide and pharmaceutical schedules. Only results obtained from the pesticide method were retained for inclusion in summary statistics.

## Sheet: TblS2.ChemSummary
Table S2. Detection frequency and maximum concentrations (nanograms per liter) detected in all samples, primary effluent (PRI), effluent treated by conventional activated sludge (OXI), and effluent treated by membrane bioreactor (MBR) collected from a domestic wastewater treatment facility, 2022. --, no data
Chemical name	CASRN	Chemical class	Overall			PRI			OXI			MBR
			N	Detection frequency, percent	Maximum concentration	N	Detection frequency, percent	Maximum concentration	N	Detection frequency, percent	Maximum concentration	N	Detection frequency, percent	Maximum concentration
4-n-Octylphenol	1806-26-4	Alkylphenol	24	50	92.7	8	50	10.3	8	37	92.7	8	62	22.6
4-Nonylphenol diethoxylates	--	Alkylphenol	24	67	3680	8	100	3680	8	37	149	8	62	109
4-Nonylphenol monoethoxylates	--	Alkylphenol	24	83	220000	8	100	220000	7	86	257	7	86	59.3
4-Nonylphenols	84852-15-3	Alkylphenol	24	33	153000	8	100	153000	8	0	--	8	0	--
Bisphenol A	80-05-7	Bisphenol	24	33	463	8	100	463	8	0	--	8	0	--
Bisphenol AF	1478-61-1	Bisphenol	24	4	17.9	7	43	17.9	8	0	--	7	0	--
Bisphenol B	77-40-7	Bisphenol	24	0	--	8	0	--	8	0	--	8	0	--
Bisphenol E	2081-08-5	Bisphenol	24	0	--	8	0	--	8	0	--	8	0	--
Bisphenol F	620-92-8	Bisphenol	24	33	44.9	8	100	44.9	8	0	--	8	0	--
Bisphenol S	80-09-1	Bisphenol	24	42	439	8	100	439	8	0	--	8	25	14.1
Methylbenzotriazole	29385-43-1	Corrosion inhibitor	27	100	32500	9	100	32500	9	100	6170	9	100	7000
11-Ketotestosterone	564-35-2	Hormone	25	12	48.9	7	43	48.9	9	0	--	9	0	--
17-alpha-Estradiol	57-9-0	Hormone	25	0	--	7	0	--	9	0	--	9	0	--
17-alpha-Ethynylestradiol	350820-06-3	Hormone	25	0	--	7	0	--	9	0	--	9	0	--
17-beta-Estradiol	50-28-2	Hormone	25	20	21.2	7	71	21.2	9	0	--	9	0	--
4-Androstene-3,17-dione	63-05-8	Hormone	25	28	976	7	86	976	9	11	5.04	9	0	--
cis-Androsterone	53-41-8	Hormone	25	24	6940	7	86	6940	9	0	--	9	0	--
Dihydrotestosterone	521-18-6	Hormone	25	20	718	7	71	718	9	0	--	9	0	--
Epitestosterone	481-30-1	Hormone	25	16	60.3	7	57	60.3	9	0	--	9	0	--
Equilenin	517-09-9	Hormone	25	0	--	7	0	--	9	0	--	9	0	--
Equilin	474-86-2	Hormone	25	0	--	7	0	--	9	0	--	9	0	--
Estriol	50-27-1	Hormone	25	20	209	7	71	209	9	0	--	9	0	--
Estrone	53-16-7	Hormone	25	24	97.8	7	71	97.8	9	0	--	9	11	2.08
Mestranol	72-33-3	Hormone	25	0	--	7	0	--	9	0	--	9	0	--
Norethindrone	68-22-4	Hormone	25	0	--	7	0	--	9	0	--	9	0	--
Progesterone	57-83-0	Hormone	25	21	38.8	7	71	38.8	9	0	--	9	0	--
Testosterone	58-22-0	Hormone	25	16	73.8	7	57	73.8	9	0	--	9	0	--
trans-Diethylstilbestrol	56-53-1	Hormone	25	0	--	7	0	--	9	0	--	9	0	--
1H-1-2-4-Triazole	288-88-0	Pesticide	27	0	--	9	0	--	9	0	--	9	0	--
2-4-D	94-75-7	Pesticide	27	81	2870	9	89	2870	9	89	981	9	67	992
2-Hydroxy-4-isopropylamino-6-amino-s-triazine (OIAT)	19988-24-0	Pesticide	27	0	--	9	0	--	9	0	--	9	0	--
2-Hydroxyatrazine (OIET)	2163-68-0	Pesticide	27	18	22.6	9	11	22.6	9	33	12.8	9	11	12.4
3-Phenoxybenzoic acid	3739-38-6	Pesticide	27	0	--	9	0	--	9	0	--	9	0	--
4-Hydroxychlorothalonil	28343-61-5	Pesticide	27	0	--	9	0	--	9	0	--	9	0	--
Acephate	30560-19-1	Pesticide	27	0	--	9	0	--	9	0	--	9	0	--
Acetochlor	34256-82-1	Pesticide	27	15	122	9	22	122	9	11	16.1	9	11	32.6
Acetochlor OA	194992-44-4	Pesticide	27	22	86.7	9	0	--	9	33	72.3	9	33	86.7
Acetochlor SA	187022-11-3	Pesticide	27	0	--	9	0	--	9	0	--	9	0	--
Atrazine	1912-24-9	Pesticide	27	63	145	9	22	68.1	9	100	123	9	67	145
Azoxystrobin	131860-33-8	Pesticide	27	52	10.7	9	56	10.7	9	44	4.23	9	56	4.62
Bentazon	25057-89-0	Pesticide	27	4	4.7	9	11	4.7	9	0	--	9	0	--
Bromacil	314-40-9	Pesticide	27	0	--	9	0	--	9	0	--	9	0	--
Bromoxynil	1689-84-5	Pesticide	27	0	--	9	0	--	9	0	--	9	0	--
Carbaryl	63-25-2	Pesticide	27	7	6.62	9	11	6.62	9	11	4.05	9	0	--
Carbendazim	10605-21-7	Pesticide	27	63	46.3	9	44	46.3	9	67	34.5	9	78	34.1
Chlorimuron-ethyl	90982-32-4	Pesticide	21	0	--	7	0	--	7	0	--	7	0	--
Chlorpyrifos	2921-88-2	Pesticide	27	0	--	9	0	--	9	0	--	9	0	--
cis-Cyhalothric acid	68127-59-3	Pesticide	27	0	--	9	0	--	9	0	--	9	0	--
cis-Permethrin	61949-76-6	Pesticide	27	0	--	9	0	--	9	0	--	9	0	--
Dechlorometolachlor	126605-22-9	Pesticide	27	4	2.19	9	11	2.19	9	0	--	9	0	--
Deethylatrazine (CIAT)	6190-65-4	Pesticide	27	18	34	9	0	--	9	33	33.7	9	22	34
Deisopropylatrazine (CEAT)	1007-28-9	Pesticide	27	0	--	9	0	--	9	0	--	9	0	--
Desulfinylfipronil	205650-65-3	Pesticide	27	4	1.63	9	0	--	9	0	--	9	11	1.63
Diazinon	333-41-5	Pesticide	27	0	--	9	0	--	9	0	--	9	0	--
Dicamba	1918-00-9	Pesticide	27	0	--	9	0	--	9	0	--	9	0	--
Dichlorvos	--	Pesticide	27	0	--	9	0	--	9	0	--	9	0	--
Dicrotophos	141-66-2	Pesticide	27	0	--	9	0	--	9	0	--	9	0	--
Didealkylatrazine (CAAT)	3397-62-4	Pesticide	27	0	--	9	0	--	9	0	--	9	0	--
Diflubenzuron	35367-38-5	Pesticide	27	0	--	9	0	--	9	0	--	9	0	--
Diketonitrile-isoxaflutole	143701-75-1	Pesticide	27	0	--	9	0	--	9	0	--	9	0	--
Dimethenamid	87674-68-8	Pesticide	27	59	18.6	9	44	18.6	9	67	14.6	9	67	11.3
Dimethoate	60-51-5	Pesticide	27	0	--	9	0	--	9	0	--	9	0	--
Diuron	330-54-1	Pesticide	27	4	11.6	9	0	--	9	11	11.6	9	0	--
Ethoprop	13194-48-4	Pesticide	27	0	--	9	0	--	9	0	--	9	0	--
Etoxazole	153233-91-1	Pesticide	27	0	--	9	0	--	9	0	--	9	0	--
Fipronil	120068-37-3	Pesticide	27	93	17.9	9	89	13	9	89	17.9	9	100	17.4
Fipronil amide	205650-69-7	Pesticide	27	4	4.7	9	11	4.7	9	0	--	9	0	--
Fipronil sulfide	120067-83-6	Pesticide	27	30	2.46	9	11	2.41	9	33	2.35	9	44	2.46
Fipronil sulfone	120068-36-2	Pesticide	27	41	5.92	9	11	4.6	9	67	5.92	9	44	5.9
Fluometuron	2164-17-2	Pesticide	27	0	--	9	0	--	9	0	--	9	0	--
Halosulfuron methyl	100784-20-1	Pesticide	27	0	--	9	0	--	9	0	--	9	0	--
Hexazinone	51235-04-2	Pesticide	27	0	--	9	0	--	9	0	--	9	0	--
Hydroxymetolachlor	131068-72-9	Pesticide	27	0	--	9	0	--	9	0	--	9	0	--
Hydroxysimazine	2599-11-3	Pesticide	27	1	16.2	9	0	--	9	11	16.2	9	0	--
Imazethapyr	81335-77-5	Pesticide	27	0	--	9	0	--	9	0	--	9	0	--
Imidacloprid	138261-41-3	Pesticide	21	52	57.8	7	0	--	7	86	56.3	7	71	57.8
Linuron	330-55-2	Pesticide	27	0	--	9	0	--	9	0	--	9	0	--
Malathion	121-75-5	Pesticide	27	0	--	9	0	--	9	0	--	9	0	--
Metalaxyl	57837-19-1	Pesticide	27	22	42.5	9	22	9.61	9	22	32.8	9	22	42.5
Metconazole	125116-23-6	Pesticide	27	0	--	9	0	--	9	0	--	9	0	--
Methamidophos	10265-92-6	Pesticide	27	0	--	9	0	--	9	0	--	9	0	--
Methomyl	16752-77-5	Pesticide	27	0	--	9	0	--	9	0	--	9	0	--
Methoxyfenozide	161050-58-4	Pesticide	27	11	0.69	9	0	--	9	11	0.32	9	22	0.69
Metolachlor	51218-45-2	Pesticide	27	85	94.4	9	78	42.6	9	89	90.5	9	89	94.4
Metolachlor OA	152019-73-3	Pesticide	27	0	--	9	0	--	9	0	--	9	0	--
Metolachlor SA	171118-09-5	Pesticide	27	18	110	9	11	110	9	22	82.7	9	22	66.5
Metribuzin	21087-64-9	Pesticide	27	0	--	9	0	--	9	0	--	9	0	--
Myclobutanil	88671-89-0	Pesticide	27	0	--	9	0	--	9	0	--	9	0	--
N-(3-4-Dichlorophenyl)-N-methylurea (DCPMU)	3567-62-2	Pesticide	27	0	--	9	0	--	9	0	--	9	0	--
Oryzalin	19044-88-3	Pesticide	27	0	--	9	0	--	9	0	--	9	0	--
Piperonyl butoxide	51-03-6	Pesticide	27	44	92.3	9	100	92.3	9	0	--	9	33	4.8
Prometon	1610-18-0	Pesticide	27	100	938	9	100	251	9	100	924	9	100	938
Propazine	139-40-2	Pesticide	27	0	--	9	0	--	9	0	--	9	0	--
Propiconazole	60207-90-1	Pesticide	27	7	12.5	9	11	12.5	9	0	--	9	11	5.94
Propoxur	114-26-1	Pesticide	27	0	--	9	0	--	9	0	--	9	0	--
Pyraclostrobin	175013-18-0	Pesticide	27	0	--	9	0	--	9	0	--	9	0	--
Simazine	122-34-9	Pesticide	27	0	--	9	0	--	9	0	--	9	0	--
Sulfentrazone	122836-35-5	Pesticide	27	22	20.9	9	22	19.9	9	11	9.82	9	33	20.9
Sulfometuron-methyl	74222-97-2	Pesticide	27	0	--	9	0	--	9	0	--	9	0	--
Tebuconazole	107534-96-3	Pesticide	27	33	20.4	9	67	20.4	9	22	12.3	9	11	12.1
Tebupirimfos	96182-53-5	Pesticide	27	0	--	9	0	--	9	0	--	9	0	--
Tebuthiuron	34014-18-1	Pesticide	27	4	3.23	9	11	3.23	9	0	--	9	0	--
Terbufos	13071-79-9	Pesticide	27	0	--	9	0	--	9	0	--	9	0	--
Terbufos oxon sulfone	56070-15-6	Pesticide	27	0	--	9	0	--	9	0	--	9	0	--
Terbufos oxon sulfoxide	56165-57-2	Pesticide	27	0	--	9	0	--	9	0	--	9	0	--
Tetraconazole	112281-77-3	Pesticide	27	0	--	9	0	--	9	0	--	9	0	--
Thiobencarb	28249-77-6	Pesticide	27	0	--	9	0	--	9	0	--	9	0	--
trans-Permethrin	61949-77-7	Pesticide	27	0	--	9	0	--	9	0	--	9	0	--
Triclopyr	55335-06-3	Pesticide	27	4	62.9	9	0	--	9	11	62.9	9	0	--
Trifloxystrobin	141517-21-7	Pesticide	27	0	--	9	0	--	9	0	--	9	0	--
10-Hydroxy-amitriptyline	64520-05-4	Pharmaceutical	27	41	110	9	100	110	9	11	10.2	9	11	18.1
1-7-Dimethylxanthine	611-59-6	Pharmaceutical	27	33	17000	9	100	17000	9	0	--	9	0	--
Abacavir	136470-78-5	Pharmaceutical	27	4	6.18	9	11	6.18	9	0	--	9	0	--
Acetaminophen	103-90-2	Pharmaceutical	17	41	163000	8	87	163000	4	0	--	5	0	--
Acyclovir	59277-89-3	Pharmaceutical	27	37	5910	9	78	5910	9	33	175	9	0	--
Albuterol	18559-94-9	Pharmaceutical	27	18	81.5	9	33	81.5	9	11	19.5	9	11	34.2
Alprazolam	28981-97-7	Pharmaceutical	27	0	--	9	0	--	9	0	--	9	0	--
Amitriptyline	50-48-6	Pharmaceutical	27	0	--	9	0	--	9	0	--	9	0	--
Amphetamine	300-62-9	Pharmaceutical	27	33	594	9	100	594	9	0	--	9	0	--
Antipyrine	60-80-0	Pharmaceutical	27	0	--	9	0	--	9	0	--	9	0	--
Atenolol	29122-68-7	Pharmaceutical	27	52	1390	9	67	1390	9	56	75.3	9	33	65.3
Benztropine	86-13-5	Pharmaceutical	27	0	--	9	0	--	9	0	--	9	0	--
Betamethasone	378-44-9	Pharmaceutical	27	0	--	9	0	--	9	0	--	9	0	--
Bupropion	34911-55-2	Pharmaceutical	27	93	325	9	78	325	9	100	177	9	100	288
Caffeine	58-08-2	Pharmaceutical	27	22	52800	9	67	52800	9	0	--	9	0	--
Carbamazepine	298-46-4	Pharmaceutical	27	26	26.6	9	100	454	9	100	452	9	100	519
Carisoprodol	78-44-4	Pharmaceutical	27	7	4.9	9	0	--	9	0	--	9	22	4.9
Chlorpheniramine	132-22-9	Pharmaceutical	27	26	26.6	9	67	26.6	9	0	--	9	11	12
Cimetidine	51481-61-9	Pharmaceutical	27	100	1380	9	100	1380	9	100	108	9	100	132
Citalopram	59729-33-8	Pharmaceutical	27	100	1100	9	100	1100	9	100	196	9	100	337
Clonidine	4205-90-7	Pharmaceutical	27	0	--	9	0	--	9	0	--	9	0	--
Codeine	76-57-3	Pharmaceutical	24	21	190	8	62	190	8	0	--	8	0	--
Cotinine	486-56-6	Pharmaceutical	27	44	4280	9	100	4280	9	11	10.7	9	22	17.7
Dehydronifedipine	67035-22-7	Pharmaceutical	27	18	4.59	9	0	--	9	33	4.59	9	22	4.16
Desmethyldiltiazem	--	Pharmaceutical	27	100	261	9	100	261	9	100	57.5	9	100	61.6
Desvenlafaxine	93413-62-8	Pharmaceutical	27	100	3130	9	100	3130	9	100	2280	9	100	2220
Dextromethorphan	125-71-3	Pharmaceutical	27	100	138	9	100	138	9	100	76.8	9	100	106
Diazepam	439-14-5	Pharmaceutical	27	0	--	9	0	--	9	0	--	9	0	--
Diltiazem	42399-41-7	Pharmaceutical	27	96	965	9	100	965	9	100	115	9	89	117
Diphenhydramine	147-24-0	Pharmaceutical	27	96	4640	9	100	4640	9	89	165	9	100	182
Duloxetine	116539-59-4	Pharmaceutical	27	0	--	9	0	--	9	0	--	9	0	--
Erythromycin	114-07-8	Pharmaceutical	27	0	--	9	0	--	9	0	--	9	0	--
Ezetimibe	163222-33-1	Pharmaceutical	27	0	--	9	0	--	9	0	--	9	0	--
Fadrozole	102676-47-1	Pharmaceutical	27	0	--	9	0	--	9	0	--	9	0	--
Famotidine	76824-35-6	Pharmaceutical	27	100	70	9	100	670	9	100	126	9	100	158
Fenofibrate	49562-28-9	Pharmaceutical	27	4	14.6	9	11	14.6	9	0	--	9	0	--
Fexofenadine	83799-24-0	Pharmaceutical	27	100	5310	9	100	5310	9	100	3170	9	100	2700
Fluconazole	86386-73-4	Pharmaceutical	27	100	126	9	100	108	9	100	126	9	100	120
Fluoxetine	54910-89-3	Pharmaceutical	27	26	136	9	56	136	9	11	77	9	11	77
Fluticasone propionate	80474-14-2	Pharmaceutical	27	0	--	9	0	--	9	0	--	9	0	--
Fluvoxamine	54739-18-3	Pharmaceutical	27	0	--	9	0	--	9	0	--	9	0	--
Gabapentin	60142-96-3	Pharmaceutical	27	93	78500	9	100	78500	9	89	877	9	89	886
Glipizide	29094-61-9	Pharmaceutical	27	26	30.8	9	67	30.8	9	11	2.65	9	0	--
Glyburide	10238-21-8	Pharmaceutical	27	67	3.68	9	67	2.48	9	67	2.72	9	67	3.68
Guanylurea	141-83-3	Pharmaceutical	27	67	4460	9	0	--	9	100	1940	9	100	4460
Hexamethylenetetramine	100-97-0	Pharmaceutical	27	81	2710	9	44	265	9	100	2710	9	100	2050
Hydrocodone	125-29-1	Pharmaceutical	27	26	88.2	9	78	88.2	9	0	--	9	0	--
Hydrocortisone	50-23-7	Pharmaceutical	18	5	215	6	17	215	6	0	--	6	0	--
Hydroxyzine	68-88-2	Pharmaceutical	27	18	55.2	9	56	55.2	9	0	--	9	0	--
Iminostilbene	256-96-2	Pharmaceutical	27	0	--	9	0	--	9	0	--	9	0	--
Ketoconazole	65277-42-1	Pharmaceutical	15	20	286	6	50	286	4	0	--	5	0	--
Lamivudine	134678-17-4	Pharmaceutical	27	0	--	9	0	--	9	0	--	9	0	--
Lidocaine	137-58-6	Pharmaceutical	27	100	978	9	100	978	9	100	711	9	100	796
Loperamide	53179-11-6	Pharmaceutical	27	0	--	9	0	--	9	0	--	9	0	--
Loratadine	79794-75-5	Pharmaceutical	27	85	12.6	9	100	12.6	9	78	5.85	9	78	5.71
Lorazepam	846-49-1	Pharmaceutical	27	0	--	9	0	--	9	0	--	9	0	--
Meprobamate	57-53-4	Pharmaceutical	27	85	49.2	9	67	39.9	9	100	49.2	9	89	48.5
Metaxalone	1665-48-1	Pharmaceutical	27	37	58.1	9	56	58.1	9	22	23.9	9	33	25.3
Metformin	657-24-9	Pharmaceutical	27	100	96900	9	100	96900	9	100	1260	9	100	497
Methadone	76-99-3	Pharmaceutical	27	18	11.7	9	33	11.7	9	22	4.22	9	0	--
Methocarbamol	532-03-6	Pharmaceutical	27	100	1420	9	100	1420	9	100	843	9	100	710
Methotrexate	59-05-2	Pharmaceutical	27	4	148	9	11	148	9	0	--	9	0	--
Metoprolol	51384-51-1	Pharmaceutical	27	100	1530	9	100	1530	9	100	384	9	100	467
Morphine	57-27-2	Pharmaceutical	27	18	134	9	56	134	9	0	--	9	0	--
Nadolol	42200-33-9	Pharmaceutical	27	18	156	9	56	156	9	0	--	9	0	--
Nevirapine	129618-40-2	Pharmaceutical	27	11	7.14	9	11	6.59	9	11	7.07	9	11	7.14
Nicotine	54-11-5	Pharmaceutical	24	33	5010	8	100	5010	8	0	--	8	0	--
Nizatidine	76963-41-2	Pharmaceutical	27	0	--	9	0	--	9	0	--	9	0	--
Nordiazepam	1088-11-5	Pharmaceutical	27	22	4.14	9	11	2.04	9	33	3.93	9	22	4.14
Norethindrone	68-22-4	Pharmaceutical	27	0	--	9	0	--	9	0	--	9	0	--
Norfluoxetine	56161-73-0	Pharmaceutical	27	11	94.2	9	33	94.2	9	0	--	9	0	--
Norsertraline	87857-41-8	Pharmaceutical	27	7	59.3	9	22	59.3	9	0	--	9	0	--
Norverapamil	67018-85-3	Pharmaceutical	27	22	15	9	44	15	9	11	3.89	9	11	4.53
Omeprazole+Esomeprazole	--	Pharmaceutical	27	37	29.8	9	33	29.8	9	44	15.3	9	33	11.5
Oseltamivir	196618-13-0	Pharmaceutical	27	0	--	9	0	--	9	0	--	9	0	--
Oxazepam	604-75-1	Pharmaceutical	27	0	--	9	0	--	9	0	--	9	0	--
Oxycodone	76-42-6	Pharmaceutical	27	30	73.1	9	78	73.1	9	11	14.1	9	0	--
Paroxetine	61869-08-7	Pharmaceutical	27	15	23.6	9	44	23.6	9	0	--	9	0	--
Penciclovir	39809-25-1	Pharmaceutical	27	0	--	9	0	--	9	0	--	9	0	--
Pentoxifylline	6493-05-6	Pharmaceutical	27	22	23.1	9	67	23.1	9	0	--	9	0	--
Phenazopyridine	94-78-0	Pharmaceutical	27	0	--	9	0	--	9	0	--	9	0	--
Phendimetrazine	634-03-7	Pharmaceutical	27	0	--	9	0	--	9	0	--	9	0	--
Phenytoin	57-41-0	Pharmaceutical	27	48	97.8	9	33	56.5	9	67	97.8	9	44	69.4
Prednisolone	50-24-8	Pharmaceutical	27	0	--	9	0	--	9	0	--	9	0	--
Prednisone	53-03-2	Pharmaceutical	27	0	--	9	0	--	9	0	--	9	0	--
Promethazine	60-87-7	Pharmaceutical	9	11	59.8	3	33	59.8	3	0	--	3	0	--
Propoxyphene	469-62-5	Pharmaceutical	27	0	--	9	0	--	9	0	--	9	0	--
Propranolol	525-66-6	Pharmaceutical	27	100	602	9	100	602	9	100	81.2	9	100	101
Pseudoephedrine+Ephedrine	--	Pharmaceutical	27	74	2420	9	100	2420	9	89	124	9	33	138
Quinine	130-95-0	Pharmaceutical	27	37	77.2	9	100	77.2	9	11	14.3	9	0	--
Ractopamine	97825-25-7	Pharmaceutical	27	0	--	9	0	--	9	0	--	9	0	--
Raloxifene	84449-90-1	Pharmaceutical	27	0	--	9	0	--	9	0	--	9	0	--
Ranitidine	66357-35-5	Pharmaceutical	18	56	6820	8	62	6820	5	40	43.1	5	60	47.4
Sertraline	79617-96-2	Pharmaceutical	27	30	217	9	67	217	9	11	14.3	9	11	12.6
Sitagliptin	486460-32-6	Pharmaceutical	27	41	256	9	56	256	9	33	150	9	33	156
Sulfadimethoxine	122-11-2	Pharmaceutical	27	0	--	9	0	--	9	0	--	9	0	--
Sulfamethizole	144-82-1	Pharmaceutical	27	0	--	9	0	--	9	0	--	9	0	--
Sulfamethoxazole	723-46-6	Pharmaceutical	27	96	1340	9	89	1340	9	100	740	9	100	888
Tamoxifen	10540-29-1	Pharmaceutical	27	0	--	9	0	--	9	0	--	9	0	--
Temazepam	846-50-4	Pharmaceutical	27	81	68.1	9	67	56.9	9	89	65.8	9	89	68.1
Theophylline	58-55-9	Pharmaceutical	27	7	2050	9	22	2050	9	0	--	9	0	--
Thiabendazole	148-79-8	Pharmaceutical	27	96	36.7	9	100	36.7	9	100	22.8	9	89	21.7
Tiotropium	186691-13-4	Pharmaceutical	27	0	--	9	0	--	9	0	--	9	0	--
Tramadol	27203-92-5	Pharmaceutical	27	100	2970	9	100	2970	9	100	2300	9	100	1530
Triamterene	396-01-0	Pharmaceutical	27	100	199	9	100	199	9	100	139	9	100	174
Trimethoprim	738-70-5	Pharmaceutical	27	33	459	9	100	459	9	0	--	9	0	--
Valacyclovir	124832-26-4	Pharmaceutical	27	7	126	9	22	126	9	0	--	9	0	--
Venlafaxine	93413-69-5	Pharmaceutical	27	100	1190	9	100	1190	9	100	740	9	100	724
Verapamil	52-53-9	Pharmaceutical	27	59	80.8	9	67	80.8	9	56	21.8	9	56	29.5
Warfarin	81-81-2	Pharmaceutical	27	44	90.5	9	89	90.5	9	22	3.25	9	22	12.6
3-beta-Coprostanol	360-68-9	Sterol	25	56	432000	7	86	432000	9	89	6450	9	0	--
Cholesterol	57-88-5	Sterol	25	60	475000	7	86	475000	9	89	15700	9	11	3060

## Sheet: TblS3.GenlWaterQuality
Table S3. General water quality data of wastewater influent collected by Hutchinson Wastewater Treatment Facility staff during 2022: monthly summary statistics and date-specific measurements corresponding to effluent sample dates. --, no data
Summary statistic or sample date	Maximum air temperature, degrees Celsiusa	Daily flow, million gallons per day	Biochemical oxygen demand, milligrams per liter	Total nitrogen, milligrams per liter as nitrogen	pH, standard units	Phosphorus, milligrams per liter	Total suspended solids, milligrams per liter
April
N	30	30	12	1	30	4	12
Minimum	-0.56	1.9	99	--	7.4	2.9	78
Median	8.1	2.3	159	--	7.7	5.1	292
Average	8.3	2.4	213	--	7.8	7	297
Standard deviation	5.3	0.25	140	--	0.3	5.5	169
Maximum	24	3.1	591	38.9	9.1	15	644
April 27	10	2.42	591	--	7.8	--	644
May
N	31	31	14	1	31	5	13
Minimum	8.9	2.3	54	--	7.5	2.5	42
Median	22	2.5	125	--	7.8	4.4	156
Average	21	2.7	125	--	7.8	4.3	196
Standard deviation	6	0.46	48	--	0.21	1.4	115
Maximum	33	4	210	28.4	8.7	6.1	414
May 17	21	2.96	153	--	7.7	--	136
May 24	20	2.48	91	--	7.8	--	150
May 31	18	2.31	73	--	8	--	--
June
N	30	30	13	1	30	4	13
Minimum	19	2	72	--	4.6	3	34
Median	27	2.2	166	--	7.9	4.2	186
Average	28	2.2	184	--	7.8	4.2	216
Standard deviation	4.6	0.104	88.4	--	0.63	1.1	144
Maximum	37	2.5	354	30.1	8.6	5.6	580
June 14	34	2.45	231	--	7.9	--	180
June 21	31	2.29	193	--	7.9	--	234
June 27	29	2.31	348	--	7.9	--	580
July
N	31	31	12	1	31	4	12
Minimum	23	1.8	111	--	7.7	4.6	72
Median	29	2.1	152	--	7.9	4.8	300
Average	28	2.1	222	--	7.9	5.2	307
Standard deviation	2.5	0.12	142	--	0.104	0.96	176
Maximum	34	2.3	559	31.1	8.3	6.7	704
August
N	31	31	15	1	31	5	15
Minimum	22	1.9	142	--	7.7	4.2	178
Median	26	2	188	--	7.9	5.18	234
Average	26	2	193	--	7.9	5.6	240
Standard deviation	2.5	0.088	43.8	--	0.13	1.4	48.1
Maximum	35	2.2	303	44.4	8.3	7.8	330
August 2	35	2.23	195	--	8	--	264
September
N	30	30	12	1	30	4	12
Minimum	13	1.7	149	--	7.6	3.8	168
Median	24	1.9	179	--	7.9	5.9	219
Average	24	1.9	194	--	7.9	5.8	224
Standard deviation	5	0.14	66	--	0.15	1.5	48.4
Maximum	33	2.3	391	40	8.5	7.5	330
September 7	30	2.07	190	--	8	--	226
aAir temperature data obtained from the 'Hutchinson Muni Station' at https://www.wunderground.com/weather/us/mn/hutchinson/KHCD. Accessed January 7, 2025.

## Sheet: TblS4.ChemClassComparisons
Table S4. Kruskal-Wallis rank sum test results comparing total number of contaminants detected in each water or effluent sample and total sample contaminant concentration, by contaminant class. Multiple comparisons were evaluated for significant results (p<0.05) using a Dunn Test with Holm correction. na, not applicable; PRI, primary effluent; MBR, membrane bioreactor treated effluent; OXI, conve…
	Alkylphenols		Bisphenols		Hormones		Pesticides		Pharmaceuticals		Sterols
	Number detected per sample	Total sample concentration per sample	Number detected per sample	Total sample concentration per sample	Number detected per sample	Total sample concentration per sample	Number detected per sample	Total sample concentration per sample	Number detected per sample	Total sample concentration per sample	Number detected per sample	Total sample concentration per sample
					Kruskal-Wallis rank sum
Chi-squared test statistic	15.6	15.7	20.2	19.5	15	15	2.79	2.08	18.6	17.4	16.2	14.7
p-value	<0.001	<0.001	<0.001	<0.001	<0.001	<0.001	0.25	0.35	<0.001	<0.001	<0.001	<0.001
					Dunn Test with Holm correction
Multiple comparisons	MBR < PRI (p<0.01) OXI < PRI (p<0.001)	MBR < PRI (p<0.01) OXI < PRI (p<0.01)	MBR < PRI (p<0.001) OXI < PRI (p<0.001)	MBR < PRI (p<0.001) OXI < PRI (p<0.001)	MBR < PRI (p<0.001) OXI < PRI (p<0.001)	MBR < PRI (p<0.001) OXI < PRI (p<0.001)	na	na	MBR < PRI (p<0.001) OXI < PRI (p<0.01)	MBR < PRI (p<0.001) OXI < PRI (p<0.001)	MBR < OXI (p<0.001) MBR < PRI (p<0.01)	MBR < OXI (p<0.05) MBR < PRI (p<0.001) OXI < PRI (p<0.05)

## Sheet: TblS5.ChemComparisons
Table S5. Wilcoxon signed-rank test results comparing concentrations of individual contaminants detected in paired samples of primary-treated effluent (PRI), activated sludge-treated effluent (OXI), and membrane bioreactor-treated effluent (MBR).
Chemical name	PRI - OXI			PRI - MBR			OXI - MBR
	N	Statistic	p-value	N	Statistic	p-value	N	Statistic	p-value
2-4-D	9	1.424	0.1544	9	1.78	0.07505	9	0.1822	0.8554
4-n-Octylphenol	8	-1.213	0.2251	8	-2.176	0.02952	8	0.2902	0.7717
4-Nonylphenol diethoxylates	8	2.521	0.01172	8	2.521	0.01172	8	0	1
Atenolol	9	2.369	0.01783	9	2.369	0.01783	9	-0.08305	0.9338
Atrazine	9	-2.369	0.01783	9	-1.519	0.1289	9	-0.8367	0.4028
Azoxystrobin	9	1.978	0.04791	9	1.978	0.04791	9	1.055	0.2914
Bupropion	9	0.8885	0.3743	9	0.6516	0.5147	9	0.2962	0.7671
Carbamazepine	9	-1.125	0.2604	9	-0.4146	0.6784	9	0.8893	0.3738
Carbendazim	9	1.723	0.08487	9	1.723	0.08487	9	-1.673	0.09426
Cimetidine	9	2.666	0.007686	9	2.547	0.01086	9	0.6516	0.5147
Citalopram	9	2.666	0.007686	9	2.666	0.007686	9	-0.8885	0.3743
Desmethyldiltiazem	9	2.666	0.007686	9	2.192	0.0284	9	-1.836	0.06632
Desvenlafaxine	9	2.31	0.02088	9	2.073	0.03815	9	-0.5331	0.594
Dextromethorphan	9	2.547	0.01086	9	2.31	0.02088	9	0.2962	0.7671
Diltiazem	9	2.666	0.007686	9	2.547	0.01086	9	-1.599	0.1097
Dimethenamid	9	-0.6682	0.504	9	0.1822	0.8554	9	1.64	0.101
Diphenhydramine	9	2.666	0.007686	9	2.666	0.007686	9	-0.4146	0.6784
Famotidine	9	2.666	0.007686	9	2.666	0.007686	9	0.4146	0.6784
Fexofenadine	9	2.668	0.007632	9	2.666	0.007686	9	-1.543	0.1229
Fipronil	4	1	0.3173	4	1	0.3173	4	0.9285	0.3532
Fluconazole	9	-2.429	0.01516	9	-1.955	0.05061	9	1.244	0.2135
Gabapentin	9	2.666	0.007686	9	2.666	0.007686	9	1.899	0.05758
Glyburide	9	1.033	0.3018	9	1.276	0.2021	9	0.5467	0.5846
Hexamethylenetetramine	9	-2.666	0.007686	9	-2.668	0.007632	9	0.5331	0.594
Lidocaine	9	0.1777	0.859	9	-0.05923	0.9528	9	0.05923	0.9528
Loratadine	9	2.429	0.01516	9	2.31	0.02088	9	-0.4781	0.6326
Meprobamate	9	-2.611	0.00903	9	-2.51	0.01207	9	-1.007	0.3139
Metalaxyl	9	-1	0.3173	9	-1.412	0.158	9	-1.412	0.158
Metaxalone	9	2.192	0.0284	9	2.192	0.0284	9	-1.723	0.08487
Methocarbamol	9	1.836	0.06632	9	2.073	0.03815	9	0.1777	0.859
Methylbenzotriazole	9	1.599	0.1097	9	1.718	0.08583	9	1.125	0.2604
Metolachlor	3	-1.069	0.285	3	-1.069	0.285	3	0.5345	0.593
Metoprolol	9	2.666	0.007686	9	2.666	0.007686	9	-0.4146	0.6784
Omeprazole+Esomeprazole	8	-1.213	0.2251	8	-2.176	0.02952	8	0.2902	0.7717
Phenytoin	9	-1.723	0.08487	9	-1.412	0.158	9	-1.978	0.04791
Prometon	9	-0.5331	0.594	9	-0.2962	0.7671	9	1.007	0.3139
Propranolol	9	2.666	0.007686	9	2.666	0.007686	9	-0.7701	0.4413
Pseudoephedrine+Ephedrine	8	-1.213	0.2251	8	-2.176	0.02952	8	0.2902	0.7717
Sitagliptin	9	2.192	0.0284	9	1.566	0.1175	9	-0.5744	0.5657
Sulfamethoxazole	9	0.7701	0.4413	9	0.6516	0.5147	9	0.1779	0.8588
Temazepam	9	-2.429	0.01516	9	-1.187	0.2353	9	0.2962	0.7671
Thiabendazole	9	2.666	0.007686	9	2.666	0.007686	9	0.9494	0.3424
Tramadol	9	2.429	0.01516	9	2.547	0.01086	9	0.05923	0.9528
Triamterene	9	1.599	0.1097	9	1.362	0.1731	9	0	1
Venlafaxine	9	2.429	0.01516	9	2.666	0.007686	9	-0.1777	0.859
Verapamil	9	1.978	0.04791	9	1.723	0.08487	9	1.723	0.08487
Warfarin	9	1.723	0.08487	9	1.412	0.158	9	-1	0.3173

## Sheet: TblS6.ChemPrctRemoval
Table S6. Percent removal of contaminants by activated sludge-treated effluent (OXI) and membrane bioreactor-treated effluent (MBR). Percent removal was calcuated for paired samples by dividing the concentration difference between each secondary-treated effluent and primary-treated effluent by the concentration in primary-treated effluent, and multiplying by 100. Kow, octanol-water coefficient; -…
Chemical name	CASRN	Predicted average logKowa	Class	N	OXI					MBR
					Minimum	Median	Mean	Standard deviation	Maximum	Minimum	Median	Mean	Standard deviation	Maximum
4-n-Octylphenol	1806-26-4	5.5	Alkylphenol	4	-800	-305.287	-327.643	370.69	100	-328.03	-191.158	-200.159	100.681	-90.2913
4-Nonylphenol diethoxylates	--	--	Alkylphenol	8	92.9384	100	98.5209	2.54598	100	94.8341	99.4161	98.3756	2.03597	100
4-Nonylphenol monoethoxylates	--	--	Alkylphenol	8	99.4971	99.9397	99.8518	0.192711	100	99.7281	99.9597	99.9245	0.0968079	100
4-Nonylphenols	84852-15-3	--	Alkylphenol	8	100	100	100	0	100	100	100	100	0	100
Bisphenol A	80-05-7	3.5	Bisphenol	8	100	100	100	0	100	100	100	100	0	100
Bisphenol AF	1478-61-1	3.7	Bisphenol	1	--	--	--	--	100	--	--	--	--	100
Bisphenol F	620-92-8	2.9	Bisphenol	8	100	100	100	0	100	100	100	100	0	100
Bisphenol S	80-09-1	1.3	Bisphenol	8	100	100	100	0	100	94.556	100	99.2188	1.90503	100
Methylbenzotriazole	29385-43-1	--	Corrosion inhibitor	9	-77.8098	34.9929	23.5446	55.954	85.0769	-62.536	40.8072	31.3997	48.9188	92.1846
11-Ketotestosterone	564-35-2	2.1	Hormone	3	100	100	100	0	100	100	100	100	0	100
17-beta-Estradiol	50-28-2	3.9	Hormone	5	100	100	100	0	100	100	100	100	0	100
4-Androstene-3,17-dione	63-05-8	2.8	Hormone	6	96.8889	100	99.4815	1.27011	100	100	100	100	0	100
cis-Androsterone	53-41-8	3.5	Hormone	6	100	100	100	0	100	100	100	100	0	100
Dihydrotestosterone	521-18-6	3.5	Hormone	5	100	100	100	0	100	100	100	100	0	100
Epitestosterone	481-30-1	3.3	Hormone	4	100	100	100	0	100	100	100	100	0	100
Estriol	50-27-1	2.7	Hormone	5	100	100	100	0	100	100	100	100	0	100
Estrone	53-16-7	3.4	Hormone	5	100	100	100	0	100	100	100	100	0	100
Progesterone	57-83-0	3.8	Hormone	6	100	100	100	0	100	100	100	100	0	100
Testosterone	58-22-0	3.3	Hormone	4	100	100	100	0	100	100	100	100	0	100
2-4-D	94-75-7	2.7	Pesticide	8	-90.8497	57.2864	26.0489	70.7887	96.4808	-73.4266	67.7393	52.8206	59.8615	100
2-Hydroxyatrazine (OIET)	2163-68-0	2.5	Pesticide	1	--	--	--	--	100	--	--	--	--	100
Acetochlor	34256-82-1	3.1	Pesticide	2	100	100	100	0	100	100	100	100	0	100
Atrazine	1912-24-9	2.7	Pesticide	2	-364.151	-191.914	-191.914	243.58	-19.6769	-447.17	-216.977	-216.977	325.542	13.2159
Azoxystrobin	131860-33-8	3.2	Pesticide	5	31.3485	100	78.3632	31.3652	100	42.732	100	79.9109	27.9556	100
Bentazon	25057-89-0	2.2	Pesticide	1	--	--	--	--	100	--	--	--	--	100
Carbaryl	63-25-2	2.4	Pesticide	1	--	--	--	--	38.8218	--	--	--	--	100
Carbendazim	10605-21-7	1.5	Pesticide	4	42.9806	56.1758	63.8331	24.9059	100	26.3499	38.5331	50.854	34.53	100
Dechlorometolachlor	126605-22-9	4.4	Pesticide	1	--	--	--	--	100	--	--	--	--	100
Dimethenamid	87674-68-8	2.3	Pesticide	4	-7.13128	4.37491	5.78098	14.2616	21.5054	-18.1818	19.4012	14.967	27.1969	39.2473
Fipronil	120068-37-3	4.8	Pesticide	8	-87.5809	-23.9716	-17.0128	56.5211	100	-125.097	-38.8386	-51.772	44.1569	-2.30769
Fipronil amide	205650-69-7	3.2	Pesticide	1	--	--	--	--	100	--	--	--	--	100
Fipronil sulfide	120067-83-6	4.8	Pesticide	1	--	--	--	--	100	--	--	--	--	100
Fipronil sulfone	120068-36-2	5	Pesticide	1	--	--	--	--	-5.86957	--	--	--	--	-28.2609
Metalaxyl	57837-19-1	0.014	Pesticide	2	-241.311	-70.6556	-70.6556	241.343	100	-342.248	-217.002	-217.002	177.124	-91.7563
Metolachlor	51218-45-2	3.1	Pesticide	7	-805	-6.89655	-220.914	379.774	15.625	-844	3.44828	-222.38	390.794	11.7371
Metolachlor SA	171118-09-5	1.1	Pesticide	1	--	--	--	--	100	--	--	--	--	100
Piperonyl butoxide	51-03-6	4.3	Pesticide	9	100	100	100	0	100	78	100	94.8859	8.19924	100
Prometon	1610-18-0	3.1	Pesticide	9	-664.286	-5	-91.1845	236.338	52.921	-502.143	-2.92249	-69.2051	191.782	60.9393
Propiconazole	60207-90-1	3.8	Pesticide	1	--	--	--	--	100	--	--	--	--	100
Sulfentrazone	122836-35-5	2	Pesticide	2	100	100	100	0	100	-5.02513	-0.83471	-0.83471	5.92614	3.3557
Tebuconazole	107534-96-3	3.7	Pesticide	6	24.3182	100	87.3864	30.897	100	8.33333	100	84.7222	37.4228	100
Tebuthiuron	34014-18-1	1.8	Pesticide	1	--	--	--	--	100	--	--	--	--	100
10-Hydroxy-amitriptyline	1159-82-6	3.3	Pharmaceutical	9	74.4361	100	97.1596	8.5213	100	54.6366	100	94.9596	15.1211	100
1-7-Dimethylxanthine	611-59-6	-0.65	Pharmaceutical	9	100	100	100	0	100	100	100	100	0	100
Abacavir	136470-78-5	1.2	Pharmaceutical	1	--	--	--	--	100	--	--	--	--	100
Acetaminophen	103-90-2	0.37	Pharmaceutical	7	100	100	100	0	100	100	100	100	0	100
Acyclovir	59277-89-3	-1.4	Pharmaceutical	7	93.3962	100	98.2118	2.58333	100	100	100	100	0	100
Albuterol	18559-94-9	0.56	Pharmaceutical	3	100	100	100	0	100	100	100	100	0	100
Amitriptyline	50-48-6	4.9	Pharmaceutical	7	100	100	100	0	100	87.8093	100	98.2585	4.60766	100
Amphetamine	300-62-9	1.8	Pharmaceutical	9	100	100	100	0	100	100	100	100	0	100
Atenolol	29122-68-7	0.12	Pharmaceutical	6	91.4723	97.0395	96.6153	2.9034	100	95.3022	100	98.9282	1.90683	100
Bupropion	34911-55-2	1.8	Pharmaceutical	7	-407.407	40.5405	-25.9873	168.771	54.4615	-579.012	50.3356	-43.966	236.53	66.0465
Caffeine	58-08-2	0.06	Pharmaceutical	6	100	100	100	0	100	100	100	100	0	100
Carbamazepine	298-46-4	2.4	Pharmaceutical	9	-106.061	-11.745	-23.6527	42.5609	25.8883	-131.696	-4.02685	-22.1282	59.3491	35.9031
Chlorpheniramine	132-22-9	3.4	Pharmaceutical	6	100	100	100	0	100	45.2055	100	90.8676	22.3698	100
Cimetidine	51481-61-9	0.48	Pharmaceutical	9	52.9358	84.1135	78.6835	18.1664	97.0797	-21.1009	90.815	76.6016	37.9236	96.875
Citalopram	59729-33-8	3	Pharmaceutical	9	40.7725	79.5128	70.6932	15.9191	85.2727	29.6296	60.3004	63.5457	19.7459	88
Codeine	76-57-3	1.2	Pharmaceutical	5	100	100	100	0	100	100	100	100	0	100
Cotinine	486-56-6	0.087	Pharmaceutical	9	99.59	100	99.9544	0.136654	100	98.8797	100	99.8315	0.380185	100
Desmethyldiltiazem	86408-45-9	3	Pharmaceutical	9	0.41841	59.5146	51.7958	28.4298	81.9157	-28.2178	59.2053	40.6143	39.8424	83.5249
Desvenlafaxine	93413-62-8	2.5	Pharmaceutical	9	-7.22892	33.3333	27.9392	20.6752	56.23	-33.7349	32.5893	25.5041	26.9631	54.1096
Dextromethorphan	125-71-3	3.9	Pharmaceutical	9	-1.68776	40.4135	34.0895	25.8705	70.6522	-20.1814	37.3961	37.2613	28.222	70.3623
Diltiazem	42399-41-7	3.1	Pharmaceutical	9	36.3289	88.0829	79.1046	18.5182	92.8623	-2.29446	84.6014	72.1622	32.0013	100
Diphenhydramine	58-73-1	3.4	Pharmaceutical	9	89.9573	94	95.2164	2.98727	100	86.2302	95	93.7495	3.99235	98.3125
Famotidine	76824-35-6	-0.62	Pharmaceutical	9	62.7219	82.2671	81.662	9.60179	94.0746	54.7101	86.9458	81.7976	12.2304	94.1343
Fenofibrate	49562-28-9	5	Pharmaceutical	1	--	--	--	--	100	--	--	--	--	100
Fexofenadine	83799-24-0	4.7	Pharmaceutical	9	19.1327	46.1268	49.4689	17.9369	75.5411	5.88235	40.6593	38.7818	17.3911	61.2554
Fluconazole	86386-73-4	0.49	Pharmaceutical	9	-184.9	-93.7626	-85.4673	64.0986	13.2135	-147.423	-94.5674	-69.395	58.8381	33.1481
Fluoxetine	54910-89-3	4.2	Pharmaceutical	5	33.6207	100	86.7241	29.6857	100	33.6207	100	86.7241	29.6857	100
Gabapentin	60142-96-3	-0.048	Pharmaceutical	9	97.4378	99.0946	98.9571	0.83295	100	97.5392	99.6353	99.2667	0.816634	100
Glipizide	29094-61-9	2.3	Pharmaceutical	6	85.3591	100	97.5599	5.97712	100	100	100	100	0	100
Glyburide	10238-21-8	3.5	Pharmaceutical	6	-11.4754	7.39625	11.42	22.0786	46.7742	-50.8197	18.6266	15.0874	38.6673	54.4944
Hexamethylenetetramine	100-97-0	-0.29	Pharmaceutical	4	-1475.58	-561.714	-764.689	477.878	-459.748	-1004.65	-604.253	-617.912	310.235	-258.491
Hydrocodone	125-29-1	1.8	Pharmaceutical	7	100	100	100	0	100	100	100	100	0	100
Hydrocortisone	50-23-7	1.6	Pharmaceutical	1	--	--	--	--	100	--	--	--	--	100
Hydroxyzine	68-88-2	2.5	Pharmaceutical	5	100	100	100	0	100	100	100	100	0	100
Ketoconazole	65277-42-1	3.8	Pharmaceutical	4	100	100	100	0	100	100	100	100	0	100
Lidocaine	137-58-6	2.2	Pharmaceutical	9	-115.686	13.5783	-18.3966	58.2409	38.7526	-101.176	-2.84238	-12.7258	50.4147	39.0572
Loratadine	79794-75-5	5.5	Pharmaceutical	9	-10.101	49.8804	50.4111	37.4343	100	-2.56881	51.1046	48.724	37.5104	100
Meprobamate	57-53-4	0.8	Pharmaceutical	6	-138.686	-62.5175	-64.4285	52.2361	-2.66667	-214.599	-65.3661	-83.2308	73.7902	-20
Metaxalone	1665-48-1	2.3	Pharmaceutical	5	58.864	100	84.3172	21.5179	100	31.6568	56.4544	64.5033	33.7994	100
Metformin	657-24-9	-1.4	Pharmaceutical	9	98.3679	99.454	99.3696	0.39062	99.6499	99.2546	99.6918	99.6545	0.189868	99.8256
Methadone	76-99-3	4.2	Pharmaceutical	3	63.9316	100	87.9772	20.8241	100	100	100	100	0	100
Methocarbamol	532-03-6	0.39	Pharmaceutical	9	-50	40.6338	20.3643	34.3866	53.4091	-26.5896	37.1221	25.3222	28.1111	51.4789
Methotrexate	59-05-2	-0.98	Pharmaceutical	1	--	--	--	--	100	--	--	--	--	100
Metoprolol	51384-51-1	1.8	Pharmaceutical	9	54.2857	89.281	84.7461	12.0603	93.1842	63.5156	90.3876	85.4567	9.83191	93.0458
Morphine	57-27-2	0.68	Pharmaceutical	5	100	100	100	0	100	100	100	100	0	100
Nadolol	42200-33-9	1.1	Pharmaceutical	5	100	100	100	0	100	100	100	100	0	100
Nevirapine	129618-40-2	2.5	Pharmaceutical	1	--	--	--	--	100	--	--	--	--	100
Nicotine	54-11-5	0.93	Pharmaceutical	8	100	100	100	0	100	100	100	100	0	100
Nordiazepam	1088-11-5	3	Pharmaceutical	1	--	--	--	--	-43.6275	--	--	--	--	100
Norfluoxetine	83891-03-6	3.9	Pharmaceutical	3	100	100	100	0	100	100	100	100	0	100
Norsertraline	87857-41-8	4.8	Pharmaceutical	2	100	100	100	0	100	100	100	100	0	100
Norverapamil	67018-85-3	4	Pharmaceutical	4	100	100	100	0	100	100	100	100	0	100
Omeprazole+Esomeprazole	--	--	Pharmaceutical	3	-195.938	61.0738	-11.6214	160.805	100	-122.437	66.1074	14.5567	119.844	100
Oxycodone	76-42-6	1.1	Pharmaceutical	7	64.75	100	94.9643	13.3232	100	100	100	100	0	100
Paroxetine	61869-08-7	3.9	Pharmaceutical	4	100	100	100	0	100	100	100	100	0	100
Pentoxifylline	6493-05-6	0.43	Pharmaceutical	6	100	100	100	0	100	100	100	100	0	100
Phenytoin	57-41-0	2.4	Pharmaceutical	3	-98.3389	-34.633	-45.2679	48.6336	-2.83186	-59.1743	-22.1239	6.23393	83.2901	100
Promethazine	60-87-7	4.7	Pharmaceutical	1	--	--	--	--	100	--	--	--	--	100
Propranolol	525-66-6	3.1	Pharmaceutical	9	16.124	74.1007	69.8074	23.654	94.6844	25.1852	76.8345	67.4171	25.2313	93.7375
Pseudoephedrine+Ephedrine	--	--	Pharmaceutical	9	91.8421	99.3568	98.3529	2.53186	100	94.2739	100	99.0857	1.95253	100
Quinine	130-95-0	3.3	Pharmaceutical	9	81.4767	100	97.9419	6.17444	100	100	100	100	0	100
Ranitidine	66357-35-5	0.6	Pharmaceutical	5	39.4933	52.7781	52.7781	18.7876	66.063	29.3592	49.2071	49.2071	28.0693	69.0551
Sertraline	79617-96-2	5	Pharmaceutical	6	85.8416	100	97.6403	5.78015	100	100	100	100	0	100
Sitagliptin	486460-32-6	1.4	Pharmaceutical	5	30.8756	34.1803	59.4524	37.0334	100	-14.7059	56.3134	55.0264	48.4041	100
Sulfamethoxazole	723-46-6	0.7	Pharmaceutical	8	-3348.28	32.6002	-420.613	1186.7	68.4496	-3693.1	43.3046	-477.896	1305.28	78.2946
Temazepam	846-50-4	2.1	Pharmaceutical	6	-45.5206	-17.4472	-2.00331	52.1292	100	-64.891	-3.23997	-12.0426	32.1562	19.6837
Theophylline	58-55-9	-0.1	Pharmaceutical	2	100	100	100	0	100	100	100	100	0	100
Thiabendazole	148-79-8	2.3	Pharmaceutical	9	0.699301	34.322	33.7293	18.9554	57.1041	1.80995	47.8571	43.9167	31.0252	100
Tramadol	27203-92-5	2.5	Pharmaceutical	9	-2.67857	39.7306	40.8503	22.0827	66.0194	-15.8416	50.5792	41.4336	24.4781	64.4013
Triamterene	396-01-0	1.1	Pharmaceutical	9	-26.3636	15.2	16.4749	26.4649	52.0725	-65.7143	19.5652	10.3314	40.6198	55.9067
Trimethoprim	738-70-5	0.9	Pharmaceutical	9	100	100	100	0	100	100	100	100	0	100
Valacyclovir	124832-26-4	-0.4	Pharmaceutical	2	100	100	100	0	100	100	100	100	0	100
Venlafaxine	93413-69-5	3.1	Pharmaceutical	9	-11.9516	32.9584	29.535	21.6528	56.4706	9.72569	28.9209	31.2821	17.305	54.3697
Verapamil	52-53-9	4.1	Pharmaceutical	6	25.8503	78.2439	74.5267	27.5361	100	41.5094	94.9523	85.8681	22.7483	100
Warfarin	81-81-2	2.9	Pharmaceutical	8	43.617	100	92.5032	19.7929	100	86.0773	100	98.2597	4.9224	100
3-beta-Coprostanol	360-68-9	9.2	Sterol	6	94.1892	99.3703	98.1609	2.32598	99.8251	100	100	100	0	100
Cholesterol	57-88-5	8.7	Sterol	6	86.7797	98.522	95.5485	5.46036	99.5714	100	100	100	0	100
aOctanol-water coefficients compiled from the U.S. Environmental Protection Agency's CompTox dashboard: https://comptox.epa.gov/dashboard/. Accessed March 19, 2024.

## Sheet: TblsS7.MicrobiomeComps
Table S7. Kruskal-Wallis rank-sum test results comparing percent of sequencing reads classified at >97% sequence similarity to bacterial phyla. Multiple comparisons were evaluated for significant results (p<0.05) using a Dunn test with Bonferroni correction. PRI, primary-treated effluent; OXI, secondary effluent treated by oxidation ditches; MBR, secondary effluent treated by membrane bioreactor;…
	Actinobacteriota	Bacteroidota	Campylobacterota	Firmicutes	Fusobacteriota	Patescibacteria	Planctomycetota	Proteobacteria	Spirochaetota	Verrucomicrobiota	Other Phyla (<1%)	Unclassified
Chi-squared test statistic	13.7	2.91	7.75	13.6	9.8	15.1	10.3	7.05	7.82	10.9	11.6	6.76
p-value	<0.05	0.23	<0.05	0	<0.05	0	<0.05	<0.05	<0.05	<0.05	<0.05	<0.05
Multiple comparisons	OXI-MBR (p<0.01) PRI-OXI (p<0.01)	na	OXI-MBR (p<0.05)	PRI-MBR (p<0.001)	PRI-MBR (p<0.01)	PRI-OXI (p<0.001)	PRI-MBR (p<0.05) PRI-OXI (p<0.01)	OXI-MBR (p<0.05)	PRI-MBR (p<0.01)	OXI-MBR (p<0.01) PRI-OXI (p<0.01)	PRI-MBR (p<0.05) PRI-OXI (p<0.01)	PRI-OXI (p<0.05)

## Sheet: TblS8.MicroLDA
Table S8. Linear Discriminant Analysis (LDA) scores from linear discriminant analysis effect size analysis to determine which operational taxonomic units (OTUs) significantly contributed to differences in relative abundances among microbiomes of primary-treated effluent (PRI), secondary effluent treated by oxidation ditches (OXI), and secondary effluent treated by membrane bioreactor (MBR).
OTU	Effluent treament	LDA score	p-value	Phyla	Class	Order	Family	Genus
Otu00032	OXI	4.81	3.58e-05	Campylobacterota	Campylobacteria	Campylobacterales	Arcobacteraceae	Arcobacter
Otu00049	PRI	4.57	0.00433	Campylobacterota	Campylobacteria	Campylobacterales	Arcobacteraceae	Arcobacter
Otu00060	PRI	4.33	0.00119	Proteobacteria	Alphaproteobacteria	Rhizobiales	Xanthobacteraceae	Rhodopseudomonas
Otu00066	MBR	4.33	0.000115	Proteobacteria	Gammaproteobacteria	Burkholderiales	Comamonadaceae	Polaromonas
Otu00034	MBR	4.31	0.00224	Proteobacteria	Alphaproteobacteria	Rhizobiales	Xanthobacteraceae	Rhodopseudomonas
Otu00126	OXI	4.22	0.000121	Actinobacteriota	Actinobacteria
Otu00158	MBR	4.21	2.56e-06	Proteobacteria	Gammaproteobacteria	Burkholderiales	Comamonadaceae
Otu00095	MBR	4.15	1.3e-05	Nitrospirota	Nitrospiria	Nitrospirales	Nitrospiraceae	Nitrospira
Otu00078	MBR	4.15	3.91e-06	Bacteroidota	Bacteroidia	Chitinophagales	Chitinophagaceae	Sediminibacterium
Otu00035	PRI	4.15	0.012	Proteobacteria	Gammaproteobacteria	Burkholderiales	Comamonadaceae	Polaromonas
Otu00113	MBR	4.12	3.14e-06	Proteobacteria	Gammaproteobacteria	Burkholderiales	Nitrosomonadaceae	Nitrosomonas
Otu00088	MBR	4.11	5.03e-05	Proteobacteria	Gammaproteobacteria	Aeromonadales	Aeromonadaceae	Aeromonas
Otu00116	MBR	4.05	1.57e-05	Proteobacteria	Gammaproteobacteria	Burkholderiales	Methylophilaceae	Methylophilus
Otu00001	PRI	4.04	0.0151	Actinobacteriota	Actinobacteria	Corynebacteriales	Mycobacteriaceae	Mycobacterium
Otu00220	MBR	3.97	3.71e-07	Proteobacteria	Alphaproteobacteria	Sphingomonadales	Sphingomonadaceae
Otu00120	MBR	3.91	1.8e-06	Proteobacteria	Alphaproteobacteria	Sphingomonadales	Sphingomonadaceae	Sphingorhabdus
Otu00146	OXI	3.91	0.0131	Proteobacteria	Gammaproteobacteria	Legionellales	Legionellaceae	Legionella
Otu00138	MBR	3.89	2.92e-05	Bacteroidota	Bacteroidia	Chitinophagales	Chitinophagaceae	Terrimonas
Otu00269	OXI	3.88	5.02e-05	Proteobacteria	Alphaproteobacteria	Paracaedibacterales	Paracaedibacteraceae
Otu00045	MBR	3.85	0.00308	Campylobacterota	Campylobacteria	Campylobacterales	Arcobacteraceae	Pseudarcobacter
Otu00142	OXI	3.84	0.000541	Proteobacteria	Gammaproteobacteria	Xanthomonadales	Rhodanobacteraceae	Ahniella
Otu00168	MBR	3.82	5.68e-05	Proteobacteria	Alphaproteobacteria	Rhizobiales	Rhizobiaceae	Allorhizobium-Neorhizobium-Pararhizobium-Rhizobium
Otu00330	OXI	3.75	0.0154	Proteobacteria	Gammaproteobacteria	Legionellales	Legionellaceae	Legionella
Otu00076	OXI	3.75	8.82e-05	Actinobacteriota	Actinobacteria	Corynebacteriales	Mycobacteriaceae	Mycobacterium
Otu00390	MBR	3.74	0.00192	Proteobacteria	Gammaproteobacteria	Salinisphaerales	Solimonadaceae	Nevskia
Otu00242	MBR	3.73	0.000122	Proteobacteria	Alphaproteobacteria	Micavibrionales	uncultured
Otu00328	OXI	3.72	9.27e-05	Proteobacteria	Alphaproteobacteria	Holosporales	Holosporaceae
Otu00239	MBR	3.68	8.61e-05	Proteobacteria	Gammaproteobacteria	Burkholderiales	Burkholderiaceae	Limnobacter
Otu00153	PRI	3.66	0.0222	Fusobacteriota	Fusobacteriia	Fusobacteriales	Leptotrichiaceae	Leptotrichia
Otu00172	MBR	3.63	0.00257	Proteobacteria	Gammaproteobacteria	Burkholderiales	Methylophilaceae
Otu00298	PRI	3.61	0.00638	Proteobacteria	Gammaproteobacteria	Aeromonadales	Aeromonadaceae
Otu00361	OXI	3.6	9.57e-05	Patescibacteria	Parcubacteria	Candidatus_Moranbacteria	Candidatus_Moranbacteria_fa	Candidatus_Moranbacteria
Otu00099	MBR	3.59	4.22e-05	Proteobacteria	Alphaproteobacteria	Sphingomonadales
Otu00244	OXI	3.59	0.000306	Patescibacteria	Microgenomatia	Candidatus_Woesebacteria	Candidatus_Woesebacteria_fa	Candidatus_Woesebacteria
Otu00288	MBR	3.58	0.000593	Acidobacteriota	Blastocatellia	11-24
Otu00353	MBR	3.56	2.55e-06	Bacteroidota	Bacteroidia	Sphingobacteriales	NS11-12_marine_group
Otu00098	MBR	3.55	3.37e-06	Proteobacteria	Alphaproteobacteria	Sphingomonadales	Sphingomonadaceae	Sphingopyxis
Otu00062	OXI	3.55	0.00239	Firmicutes	Bacilli	Lactobacillales	Carnobacteriaceae	Trichococcus
Otu00267	MBR	3.53	0.000173	Nitrospirota	Nitrospiria	Nitrospirales	Nitrospiraceae	Nitrospira
Otu00205	MBR	3.52	0.000113	Proteobacteria	Alphaproteobacteria	Rhizobiales	Hyphomicrobiaceae	Hyphomicrobium
Otu00105	OXI	3.5	0.00283	Actinobacteriota	Acidimicrobiia	Microtrichales	Microtrichaceae	Candidatus_Microthrix
Otu00228	PRI	3.48	0.00541	Proteobacteria	Gammaproteobacteria	Burkholderiales	Burkholderiales_unclassified
Otu00074	MBR	3.47	0.000151	Proteobacteria	Gammaproteobacteria	Burkholderiales	Rhodocyclaceae
Otu00137	MBR	3.46	4.55e-06	Bacteroidota	Bacteroidia	Flavobacteriales	Flavobacteriaceae	Flavobacterium
Otu00232	PRI	3.44	0.04	Firmicutes	Clostridia	Oscillospirales	Ruminococcaceae	Faecalibacterium
Otu00127	OXI	3.42	8.43e-05	Bacteroidota	Bacteroidia	Chitinophagales	Chitinophagaceae	Ferruginibacter
Otu00238	OXI	3.42	7.9e-05	Proteobacteria	Gammaproteobacteria	Burkholderiales	SC-I-84
Otu00403	MBR	3.4	0.000581	Proteobacteria	Alphaproteobacteria	Rickettsiales	SM2D12
Otu00047	OXI	3.4	9.19e-05	Proteobacteria	Gammaproteobacteria	Cellvibrionales	Halieaceae	OM60(NOR5)_clade
Otu00119	OXI	3.39	2.12e-05	Planctomycetota	Planctomycetes	Pirellulales	Pirellulaceae	Pir4_lineage
Otu00301	MBR	3.37	0.00192	Cyanobacteria	Cyanobacteriia
Otu00243	OXI	3.35	4.75e-05	Bacteroidota	Bacteroidia	Chitinophagales	uncultured Saprospiraceae
Otu00102	OXI	3.33	2.34e-05	Bacteroidota	Bacteroidia	Chitinophagales	Saprospiraceae	OLB8
Otu00249	MBR	3.32	0.000151	Proteobacteria	Alphaproteobacteria	Caulobacterales	Hyphomonadaceae	Hirschia
Otu00517	PRI	3.32	5.74e-05	Bacteroidota	Bacteroidia	Bacteroidales	Bacteroidaceae	Bacteroides
Otu00209	OXI	3.31	0.00145	Proteobacteria	Alphaproteobacteria	Tistrellales	Geminicoccaceae	Candidatus_Alysiosphaera
Otu00647	OXI	3.31	0.000584	Bacteria_unclassified
Otu00208	OXI	3.3	0.000123	Actinobacteriota	Thermoleophilia	Solirubrobacterales	67-14
Otu00444	MBR	3.3	1.57e-05	Bdellovibrionota	Bdellovibrionia	Bdellovibrionales	Bdellovibrionaceae	Bdellovibrio
Otu00326	OXI	3.3	0.000196	Dependentiae	Babeliae	Babeliales	Babeliales_unclassified
Otu00145	MBR	3.29	0.00027	Proteobacteria	Alphaproteobacteria	Rhizobiales	Xanthobacteraceae
Otu00159	MBR	3.29	9.35e-05	Planctomycetota	Planctomycetes	Planctomycetales	Rubinisphaeraceae	SH-PL14
Otu00086	OXI	3.29	2.15e-05	Firmicutes	Clostridia	Peptostreptococcales-Tissierellales	Peptostreptococcaceae	Romboutsia
Otu00648	OXI	3.29	0.00227	Proteobacteria	Gammaproteobacteria	Coxiellales	Coxiellaceae	Coxiella
Otu00112	OXI	3.28	0.00166	Actinobacteriota	Actinobacteria	Corynebacteriales	Nocardiaceae	Rhodococcus
Otu00568	MBR	3.28	4.52e-05	Proteobacteria	Gammaproteobacteria	Burkholderiales	Comamonadaceae
Otu00577	MBR	3.27	2.04e-05	Bacteroidota	Bacteroidia	Flavobacteriales	Crocinitomicaceae	Fluviicola
Otu00067	PRI	3.27	0.000198	Bacteroidota	Bacteroidia	Bacteroidales	Tannerellaceae	Macellibacteroides
Otu00475	MBR	3.26	7.57e-05	Bacteroidota	Bacteroidia	Sphingobacteriales	KD3-93
Otu00279	OXI	3.25	0.000463	Actinobacteriota	Acidimicrobiia	Microtrichales	Iamiaceae	Iamia
Otu00490	PRI	3.25	0.0129	Proteobacteria	Alphaproteobacteria	Holosporales	Holosporaceae
Otu00451	MBR	3.25	3.08e-06	Bacteroidota	Bacteroidia	Flavobacteriales	Flavobacteriaceae	Flavobacterium
Otu00289	OXI	3.25	5.97e-05	Patescibacteria	Parcubacteria
Otu00477	MBR	3.24	8.61e-05	Proteobacteria	Alphaproteobacteria	Rhizobiales	Rhizobiales_Incertae_Sedis	Phreatobacter
Otu00559	OXI	3.24	0.001	Bacteria_unclassified
Otu00645	OXI	3.22	0.00606	Proteobacteria	Gammaproteobacteria	Legionellales	Legionellaceae	Legionella
Otu00012	MBR	3.22	0.000553	Bacteroidota	Bacteroidia	Flavobacteriales	Flavobacteriaceae	Flavobacterium
Otu00286	PRI	3.22	0.00119	Proteobacteria	Gammaproteobacteria	Chromatiales	Chromatiaceae
Otu00401	MBR	3.21	0.000244	Bacteroidota	Bacteroidia	Flavobacteriales	Flavobacteriaceae	Flavobacterium
Otu00381	OXI	3.21	7e-05	Patescibacteria	Gracilibacteria
Otu00717	OXI	3.21	0.0162	Bacteria_unclassified
Otu00182	OXI	3.2	0.000334	Proteobacteria	Alphaproteobacteria	Tistrellales	Geminicoccaceae	Candidatus_Alysiosphaera
Otu00175	MBR	3.19	0.00104	Proteobacteria	Alphaproteobacteria	Sphingomonadales	Sphingomonadaceae
Otu00731	OXI	3.19	0.000106	Actinobacteriota	Thermoleophilia	Solirubrobacterales	Solirubrobacterales_unclassified
Otu00023	MBR	3.19	1.57e-05	Proteobacteria	Alphaproteobacteria	Rhodobacterales	Rhodobacteraceae	Pseudorhodobacter
Otu00268	OXI	3.19	0.00135	Actinobacteriota	Actinobacteria	Frankiales	Sporichthyaceae	Longivirga
Otu00251	PRI	3.19	0.00559	Actinobacteriota	Actinobacteria	Bifidobacteriales	Bifidobacteriaceae	Bifidobacterium
Otu00542	OXI	3.18	3.79e-05	Patescibacteria	Parcubacteria	Candidatus_Moranbacteria	Candidatus_Moranbacteria_fa	Candidatus_Moranbacteria
Otu00412	MBR	3.17	7.78e-06	Proteobacteria	Alphaproteobacteria	Caulobacterales	Caulobacteraceae	Brevundimonas
Otu00749	OXI	3.17	0.0154	Patescibacteria	Gracilibacteria	Absconditabacteriales_(SR1)
Otu00552	MBR	3.16	3.7e-07	Proteobacteria	Alphaproteobacteria	Rhizobiales	Rhizobiales_Incertae_Sedis	Phreatobacter
Otu00160	OXI	3.16	0.000131	Planctomycetota	Planctomycetes	Pirellulales	Pirellulaceae	Pir4_lineage
Otu00765	MBR	3.16	0.00192	Proteobacteria	Alphaproteobacteria	Micavibrionales	uncultured
Otu00661	OXI	3.15	0.000198	Patescibacteria	Microgenomatia	Candidatus_Woesebacteria
Otu00053	MBR	3.15	0.00483	Proteobacteria	Gammaproteobacteria	Burkholderiales	Rhodocyclaceae	Methyloversatilis
Otu00565	OXI	3.15	8.51e-05	Patescibacteria	Parcubacteria
Otu00427	MBR	3.14	0.00156	Proteobacteria	Alphaproteobacteria	Sphingomonadales	uncultured Sphingomonadaceae
Otu00514	MBR	3.14	0.00203	Proteobacteria	Alphaproteobacteria	Rickettsiales	Rickettsiaceae
Otu00106	MBR	3.14	0.000379	Proteobacteria	Gammaproteobacteria	Burkholderiales	Comamonadaceae
Otu00657	OXI	3.14	0.000471	SAR324_clade(Marine_group_B)
Otu00021	MBR	3.13	0.000883	Proteobacteria	Alphaproteobacteria	Rhodobacterales	Rhodobacteraceae	Rhodobacter
Otu00121	OXI	3.13	8.4e-05	Proteobacteria	Alphaproteobacteria	Reyranellales	Reyranellaceae	Reyranella
Otu00272	OXI	3.13	0.00107	Bdellovibrionota	Oligoflexia	Oligoflexales	Oligoflexales_fa	Oligoflexus
Otu00434	OXI	3.12	0.000111	Actinobacteriota	Acidimicrobiia	Microtrichales	Iamiaceae	Iamia
Otu00181	OXI	3.11	0.000102	Actinobacteriota	Actinobacteria	PeM15
Otu00287	OXI	3.11	0.00163	Actinobacteriota	Actinobacteria	Frankiales	Sporichthyaceae	Sporichthya
Otu00362	MBR	3.11	0.000351	Proteobacteria	Alphaproteobacteria	Caulobacterales	Hyphomonadaceae	SWB02
Otu00321	OXI	3.1	0.0002	Actinobacteriota	Thermoleophilia	Solirubrobacterales	Solirubrobacteraceae	Conexibacter
Otu00592	MBR	3.1	0.000271	Proteobacteria	Gammaproteobacteria	Gammaproteobacteria_Incertae_Sedis
Otu00662	OXI	3.09	0.000311	Patescibacteria	Parcubacteria	Candidatus_Moranbacteria
Otu00685	OXI	3.09	0.00105	Patescibacteria	ABY1	Candidatus_Falkowbacteria
Otu00094	OXI	3.09	0.000116	Proteobacteria	Gammaproteobacteria	Burkholderiales	Rhodocyclaceae	Ferribacterium
Otu00700	MBR	3.09	6.64e-06	Proteobacteria	Gammaproteobacteria	Burkholderiales	Nitrosomonadaceae	Nitrosomonas
Otu00385	MBR	3.08	1.57e-05	Proteobacteria	Alphaproteobacteria	Sphingomonadales	Sphingomonadaceae	Sphingomonas
Otu00226	OXI	3.08	0.000702	Bacteroidota	Bacteroidia	Sphingobacteriales	Sphingobacteriaceae	Pedobacter
Otu00788	OXI	3.07	0.000806	Patescibacteria	Parcubacteria	Candidatus_Moranbacteria
Otu00752	MBR	3.07	2.56e-06	Planctomycetota	OM190
Otu00742	OXI	3.06	2.63e-05	Patescibacteria	Parcubacteria
Otu00707	MBR	3.05	1.57e-05	Planctomycetota	Phycisphaerae	Phycisphaerales	Phycisphaeraceae	SM1A02
Otu00040	OXI	3.05	0.000693	Proteobacteria	Gammaproteobacteria	Burkholderiales	Rhodocyclaceae	Azoarcus
Otu00828	OXI	3.05	0.000586	Bacteria_unclassified
Otu00247	OXI	3.04	0.000376	Proteobacteria	Alphaproteobacteria	Rhodobacterales	Rhodobacteraceae
Otu00274	OXI	3.04	0.000472	Proteobacteria	Alphaproteobacteria	Rhizobiales	Xanthobacteraceae
Otu00701	MBR	3.04	0.000359	Planctomycetota	Planctomycetes	Planctomycetales	Rubinisphaeraceae
Otu00338	OXI	3.02	0.000109	Actinobacteriota	Actinobacteria	Propionibacteriales	Nocardioidaceae	Nocardioides
Otu00646	PRI	3.01	0.00119	Acidobacteriota	Holophagae	Holophagales	Holophagaceae	Holophaga
Otu00148	OXI	3	0.000108	Proteobacteria	Alphaproteobacteria	Rhizobiales	Rhizobiaceae	Mesorhizobium
Otu00433	MBR	3	5.03e-05	Bacteroidota	Bacteroidia	Cytophagales	uncultured Microscillaceae
Otu00213	OXI	3	5.76e-05	Actinobacteriota	Actinobacteria	Corynebacteriales	Mycobacteriaceae	Mycobacterium
Otu00384	PRI	3	6.65e-05	Campylobacterota	Campylobacteria	Campylobacterales	Sulfurospirillaceae	Sulfurospirillum
Otu00858	MBR	3	0.0001	Proteobacteria	Gammaproteobacteria	Burkholderiales	TRA3-20
Otu00730	MBR	2.99	1.57e-05	Bacteroidota	Bacteroidia	Flavobacteriales	Crocinitomicaceae	Crocinitomix
Otu00262	OXI	2.98	1.89e-05	Proteobacteria	Gammaproteobacteria	Steroidobacterales	uncultured Steroidobacteraceae
Otu00881	MBR	2.98	0.00192	Proteobacteria	Alphaproteobacteria	Rickettsiales	SM2D12
Otu00307	PRI	2.98	0.0329	Firmicutes	Bacilli	Erysipelotrichales	Erysipelotrichaceae	Erysipelothrix
Otu00445	MBR	2.97	0.000213	Planctomycetota	Planctomycetes	uncultured Planctomycetales
Otu00194	MBR	2.97	0.000106	Proteobacteria	Alphaproteobacteria	Sphingomonadales	Sphingomonadaceae	Sphingomonas
Otu00217	OXI	2.97	6.61e-06	Firmicutes	Clostridia	Clostridiales	Clostridiaceae	Clostridium_sensu_stricto_1
Otu00774	OXI	2.97	0.0025	SAR324_clade(Marine_group_B)
Otu00716	MBR	2.96	8.58e-05	Patescibacteria	Parcubacteria
Otu00851	MBR	2.95	0.000231	Bacteroidota	Bacteroidia	Sphingobacteriales	AKYH767
Otu00240	OXI	2.95	6.17e-05	Proteobacteria	Alphaproteobacteria	Rhizobiales	uncultured Rhizobiales_Incertae_Sedis
Otu00275	OXI	2.95	7.31e-05	Planctomycetota	Planctomycetes	Pirellulales	Pirellulaceae	Pir4_lineage
Otu00165	OXI	2.95	0.000909	Proteobacteria	Alphaproteobacteria	Holosporales	uncultured Holosporaceae
Otu00372	MBR	2.95	0.000117	Bacteroidota	Bacteroidia	Flavobacteriales	Flavobacteriaceae	Flavobacterium
Otu00912	OXI	2.95	0.00119	Patescibacteria	Microgenomatia	Candidatus_Woesebacteria
Otu01013	OXI	2.95	0.00142	Patescibacteria	Microgenomatia	Candidatus_Woesebacteria
Otu00838	MBR	2.94	0.0013	Verrucomicrobiota	Verrucomicrobiae	Opitutales	Opitutaceae	Lacunisphaera
Otu00816	OXI	2.94	0.00167	Proteobacteria	Gammaproteobacteria
Otu00255	OXI	2.93	4.69e-05	Planctomycetota	Planctomycetes	Pirellulales	Pirellulaceae	Pir4_lineage
Otu01211	MBR	2.93	0.00189	Myxococcota	Polyangia	Haliangiales	Haliangiaceae	Haliangium
Otu00131	MBR	2.93	0.00031	Proteobacteria	Alphaproteobacteria	Caulobacterales	Caulobacteraceae	Brevundimonas
Otu00143	OXI	2.92	0.000126	Proteobacteria	Gammaproteobacteria	Xanthomonadales	Rhodanobacteraceae	Dokdonella
Otu00721	OXI	2.92	0.00117	Bacteroidota	Bacteroidia	Flavobacteriales	Weeksellaceae	Chryseobacterium
Otu00316	MBR	2.92	0.0116	Proteobacteria	Alphaproteobacteria	Caulobacterales	Caulobacteraceae	Brevundimonas
Otu00416	MBR	2.92	0.0125	Proteobacteria	Gammaproteobacteria	Burkholderiales	Comamonadaceae
Otu00889	MBR	2.92	7.41e-06	Proteobacteria	Gammaproteobacteria	Burkholderiales	Nitrosomonadaceae	Nitrosomonas
Otu00941	OXI	2.92	0.000689	Bacteria_unclassified
Otu01182	OXI	2.91	0.00543	Patescibacteria	Gracilibacteria	Candidatus_Abawacabacteria
Otu00587	MBR	2.91	5.41e-05	Campylobacterota	Campylobacteria	Campylobacterales	Sulfurimonadaceae	Sulfurimonas
Otu00977	MBR	2.9	8.61e-05	Proteobacteria	Alphaproteobacteria	Sphingomonadales	Sphingomonadaceae	Sandarakinorhabdus
Otu00214	OXI	2.9	0.000298	Proteobacteria	Alphaproteobacteria	Rhizobiales	Rhizobiaceae
Otu00992	MBR	2.9	8.58e-05	Proteobacteria	Alphaproteobacteria	Caulobacterales	Parvularculaceae	Amphiplicatus
Otu00611	MBR	2.9	6.51e-05	Proteobacteria	Gammaproteobacteria	Acidithiobacillales	Acidithiobacillaceae	KCM-B-112
Otu00499	OXI	2.89	0.0184	Proteobacteria	Alphaproteobacteria	Rhizobiales	Rhizobiales_Incertae_Sedis	Bauldia
Otu00506	MBR	2.89	0.00172	Proteobacteria	Alphaproteobacteria	Rhizobiales	Hyphomicrobiaceae
Otu00435	OXI	2.89	0.0382	Actinobacteriota	Actinobacteria	Propionibacteriales	Nocardioidaceae	Nocardioides
Otu00170	OXI	2.89	0.000259	Proteobacteria	Gammaproteobacteria	Cellvibrionales	Halieaceae	Halioglobus
Otu00329	OXI	2.88	0.0129	Proteobacteria	Gammaproteobacteria	Pseudomonadales	Moraxellaceae	Moraxellaceae
Otu00528	OXI	2.88	0.021	Actinobacteriota	Thermoleophilia	Gaiellales	uncultured
Otu00792	OXI	2.88	0.00385	Proteobacteria	Gammaproteobacteria	EV818SWSAP88
Otu00937	OXI	2.88	0.000122	Patescibacteria	ABY1	Candidatus_Magasanikbacteria
Otu00976	OXI	2.88	0.00528	Patescibacteria	ABY1	Candidatus_Magasanikbacteria
Otu00065	MBR	2.88	0.00058	Planctomycetota	OM190
Otu00223	OXI	2.87	0.03	Proteobacteria	Alphaproteobacteria	Rhodobacterales	Rhodobacteraceae
Otu00211	OXI	2.87	0.000566	Actinobacteriota	Actinobacteria	Micrococcales	Microbacteriaceae
Otu01031	OXI	2.87	0.013	Proteobacteria	Gammaproteobacteria	Legionellales	Legionellaceae	Legionella
Otu00929	MBR	2.87	0.00192	Bacteroidota	Bacteroidia	Chitinophagales	Saprospiraceae
Otu00174	PRI	2.87	0.00313	Bacteroidota	Bacteroidia	Bacteroidales	Tannerellaceae	Macellibacteroides
Otu00195	OXI	2.86	0.00011	Proteobacteria	Alphaproteobacteria	Rhizobiales	A0839
Otu00151	OXI	2.86	2.6e-05	Proteobacteria	Alphaproteobacteria	Reyranellales	Reyranellaceae	Reyranella
Otu01111	MBR	2.86	1.57e-05	Proteobacteria	Alphaproteobacteria	Caulobacterales	Parvularculaceae	Amphiplicatus
Otu01005	OXI	2.86	0.00124	SAR324_clade(Marine_group_B)
Otu00551	OXI	2.85	0.00448	Patescibacteria	Gracilibacteria	Candidatus_Peregrinibacteria	Candidatus_Peregrinibacteria_fa	Candidatus_Peregrinibacteria
Otu00777	OXI	2.85	0.0004	Patescibacteria	Parcubacteria	Candidatus_Moranbacteria
Otu00246	OXI	2.84	9.55e-05	Proteobacteria	Alphaproteobacteria	Rhizobiales	Hyphomicrobiaceae	Hyphomicrobium
Otu00663	OXI	2.84	0.000158	Chloroflexi	KD4-96
Otu00546	OXI	2.83	0.013	Proteobacteria	Alphaproteobacteria	Tistrellales	Geminicoccaceae	Candidatus_Alysiosphaera
Otu00394	OXI	2.83	0.00145	Bacteroidota	Bacteroidia	Chitinophagales	Chitinophagaceae	Terrimonas
Otu00543	PRI	2.83	0.000744	Bacteroidota	Bacteroidia	Bacteroidales	Paludibacteraceae	Paludibacter
Otu00614	OXI	2.82	4.36e-05	Verrucomicrobiota	Verrucomicrobiae	Verrucomicrobiales	DEV007
Otu01340	MBR	2.82	1.57e-05	Proteobacteria	Alphaproteobacteria	Caulobacterales	Caulobacteraceae
Otu00893	OXI	2.82	0.00536	Patescibacteria	Parcubacteria	Candidatus_Kaiserbacteria
Otu01027	OXI	2.82	6.47e-05	Patescibacteria	Parcubacteria	Candidatus_Kaiserbacteria
Otu00856	OXI	2.82	0.00684	SAR324_clade(Marine_group_B)
Otu00185	OXI	2.81	0.000242	Proteobacteria	Gammaproteobacteria	Xanthomonadales	Xanthomonadaceae
Otu00201	OXI	2.81	6.62e-05	Bacteroidota	Bacteroidia	uncultured Chitinophagales
Otu00354	OXI	2.81	0.000127	Actinobacteriota	Acidimicrobiia	Microtrichales	uncultured Microtrichaceae
Otu00855	MBR	2.81	2.84e-06	Actinobacteriota	Actinobacteria	Micrococcales	Intrasporangiaceae
Otu00530	OXI	2.81	0.000327	Proteobacteria	Gammaproteobacteria	Gammaproteobacteria_unclassified	Gammaproteobacteria_unclassified
Otu01311	OXI	2.81	0.00719	SAR324_clade(Marine_group_B)
Otu00282	OXI	2.8	2.85e-05	Proteobacteria	Alphaproteobacteria	Sphingomonadales	Sphingomonadaceae	Sphingorhabdus
Otu01040	MBR	2.8	0.000426	Bacteroidota	Bacteroidia	Sphingobacteriales	NS11-12_marine_group
Otu00408	OXI	2.8	0.000405	Proteobacteria	Alphaproteobacteria	Rhizobiales	Beijerinckiaceae	Methylocystis
Otu00563	PRI	2.8	0.00113	Firmicutes	Clostridia	Oscillospirales	Ruminococcaceae	Ruminococcus
Otu00036	MBR	2.8	0.000175	Proteobacteria	Gammaproteobacteria	Enterobacterales	Enterobacteriaceae
Otu00606	PRI	2.8	0.00868	Firmicutes	Clostridia	Christensenellales	Christensenellaceae	Christensenellaceae_R-7_group
Otu00419	OXI	2.8	0.000151	Proteobacteria	Gammaproteobacteria	Burkholderiales	Comamonadaceae
Otu00173	MBR	2.79	2.78e-06	Bacteroidota	Bacteroidia	Sphingobacteriales	Sphingobacteriaceae	Solitalea
Otu01038	MBR	2.79	0.000271	Planctomycetota	Phycisphaerae	Phycisphaerales	Phycisphaeraceae
Otu00426	MBR	2.79	0.000127	Proteobacteria	Alphaproteobacteria	Paracaedibacterales	uncultured Paracaedibacteraceae
Otu00724	OXI	2.79	0.000806	Proteobacteria	Gammaproteobacteria	JG36-TzT-191
Otu00960	OXI	2.79	0.000199	Patescibacteria	Parcubacteria	Candidatus_Moranbacteria
Otu01102	PRI	2.79	0.00498	Proteobacteria	Gammaproteobacteria	Burkholderiales	Oxalobacteraceae	Janthinobacterium
Otu00488	OXI	2.79	8.68e-05	Actinobacteriota	Acidimicrobiia	Acidimicrobiia_unclassified	Acidimicrobiia_unclassified
Otu01222	OXI	2.79	0.00321	Patescibacteria	Gracilibacteria	Absconditabacteriales_(SR1)
Otu00322	OXI	2.78	0.00958	Proteobacteria	Alphaproteobacteria	Rhodobacterales	Rhodobacteraceae	Amaricoccus
Otu00351	MBR	2.78	0.00215	Proteobacteria	Alphaproteobacteria	Rhizobiales
Otu00708	MBR	2.78	0.0369	Proteobacteria	Alphaproteobacteria	Rhizobiales	Rhizobiaceae
Otu00281	OXI	2.77	0.0105	Proteobacteria	Alphaproteobacteria	Tistrellales	Geminicoccaceae	Candidatus_Alysiosphaera
Otu00292	PRI	2.77	0.0058	Firmicutes	Bacilli	Lactobacillales	Streptococcaceae	Lactococcus
Otu00868	MBR	2.76	0.000271	Proteobacteria	Gammaproteobacteria	Xanthomonadales	Rhodanobacteraceae	Ahniella
Otu00812	OXI	2.76	0.000247	Proteobacteria	Gammaproteobacteria	CCM19a
Otu01426	MBR	2.76	8.61e-05	Bacteria_unclassified
Otu01541	OXI	2.76	0.0162	Patescibacteria	Gracilibacteria
Otu00340	PRI	2.75	0.00169	Proteobacteria	Alphaproteobacteria	Rickettsiales	Rickettsiaceae	Candidatus_Megaira
Otu01134	MBR	2.75	0.000751	Myxococcota	Polyangia	Polyangiales	Polyangiaceae	Pajaroellobacter
Otu00072	PRI	2.75	0.000603	Bacteroidota	Bacteroidia	Flavobacteriales	Weeksellaceae	Cloacibacterium
Otu00825	MBR	2.75	2.7e-05	Bacteroidota	Bacteroidia	Flavobacteriales	Crocinitomicaceae	Fluviicola
Otu00212	OXI	2.75	0.00133	Bacteroidota	Bacteroidia	Chitinophagales	uncultured Saprospiraceae
Otu00629	PRI	2.74	0.0465	Bacteroidota	Bacteroidia	Bacteroidales	Bacteroidaceae	Bacteroides
Otu00311	OXI	2.73	0.000301	Proteobacteria	Alphaproteobacteria	Reyranellales	Reyranellaceae	Reyranella
Otu00509	OXI	2.73	0.00088	Planctomycetota	Planctomycetes	Pirellulales	Pirellulaceae
Otu00673	MBR	2.73	2.31e-05	Patescibacteria	Gracilibacteria	JGI_0000069-P22
Otu00903	MBR	2.73	0.00189	Bdellovibrionota	Bdellovibrionia	Bacteriovoracales	Bacteriovoracaceae	Bacteriovorax
Otu00325	OXI	2.73	6.24e-05	Bacteroidota	SJA-28
Otu00083	OXI	2.72	0.0297	Actinobacteriota	Actinobacteria	Micrococcales	Intrasporangiaceae
Otu00348	OXI	2.72	0.00108	Fusobacteriota	Fusobacteriia	Fusobacteriales	Fusobacteriaceae	Cetobacterium
Otu00667	PRI	2.72	0.0032	Actinobacteriota	Coriobacteriia	Coriobacteriales	Coriobacteriaceae	Collinsella
Otu01337	OXI	2.72	0.0138	Verrucomicrobiota	Chlamydiae	Chlamydiales	Parachlamydiaceae	Candidatus_Protochlamydia
Otu00754	MBR	2.72	6.8e-06	Proteobacteria	Gammaproteobacteria	Burkholderiales	Comamonadaceae	Hydrogenophaga
Otu00922	OXI	2.72	0.00462	Chloroflexi	KD4-96
Otu00636	PRI	2.71	0.0126	Firmicutes	Clostridia	Oscillospirales	Ruminococcaceae	Subdoligranulum
Otu00306	OXI	2.71	0.000208	Bacteroidota	Bacteroidia	Chitinophagales	Chitinophagaceae	Ferruginibacter
Otu01092	OXI	2.71	0.00169	Proteobacteria	Gammaproteobacteria
Otu00668	OXI	2.7	0.00544	Actinobacteriota	Acidimicrobiia	Microtrichales	Iamiaceae	Iamia
Otu00108	PRI	2.7	0.028	Bacteroidota	Bacteroidia	Bacteroidales	Paludibacteraceae	Paludibacter
Otu00043	OXI	2.69	0.000154	Proteobacteria	Alphaproteobacteria	Rhodobacterales	Rhodobacteraceae
Otu00082	OXI	2.69	0.00211	Proteobacteria	Alphaproteobacteria	Rhodobacterales	Rhodobacteraceae
Otu00453	OXI	2.69	0.00176	Actinobacteriota	Actinobacteria	Propionibacteriales	Nocardioidaceae	Marmoricola
Otu00993	OXI	2.69	0.000107	SAR324_clade(Marine_group_B)
Otu01048	MBR	2.68	4.5e-05	Proteobacteria	Alphaproteobacteria	Micavibrionales	uncultured
Otu00264	OXI	2.68	0.000329	Bacteroidota	Bacteroidia	Chitinophagales	uncultured Chitinophagaceae
Otu01164	OXI	2.68	0.00269	Patescibacteria	ABY1	Candidatus_Magasanikbacteria
Otu00699	PRI	2.68	4.52e-05	Proteobacteria	Gammaproteobacteria	Burkholderiales	Rhodocyclaceae
Otu00927	MBR	2.68	2.56e-06	Proteobacteria	Gammaproteobacteria	Burkholderiales	Nitrosomonadaceae	Nitrosomonas
Otu00460	OXI	2.68	0.000313	Acidobacteriota	Blastocatellia	Blastocatellales	Blastocatellaceae
Otu01319	OXI	2.68	0.00353	SAR324_clade(Marine_group_B)
Otu01353	OXI	2.68	0.0188	Bacteria_unclassified
Otu01601	OXI	2.68	0.00401	Patescibacteria	Gracilibacteria
Otu00738	MBR	2.67	0.000457	Proteobacteria	Alphaproteobacteria	Rhizobiales	A0839
Otu00342	OXI	2.67	0.00112	Bacteroidota	Bacteroidia	Chitinophagales	uncultured Saprospiraceae
Otu00926	MBR	2.67	2.42e-05	Proteobacteria	Alphaproteobacteria	Caulobacterales	Parvularculaceae	Amphiplicatus
Otu00934	OXI	2.67	0.000968	Patescibacteria	Parcubacteria	Candidatus_Moranbacteria
Otu00370	MBR	2.67	0.0426	Bdellovibrionota	Bdellovibrionia	Bacteriovoracales	Bacteriovoracaceae	Bacteriovorax
Otu01237	MBR	2.66	8.58e-05	Bacteroidota	Bacteroidia	Sphingobacteriales	env.OPS_17
Otu00705	PRI	2.66	0.00581	Firmicutes	Clostridia	Lachnospirales	Lachnospiraceae	Dorea
Otu00618	OXI	2.66	0.000125	Bacteroidota	Bacteroidia	Chitinophagales	Saprospiraceae
Otu01297	OXI	2.66	0.00414	Patescibacteria	ABY1	Candidatus_Falkowbacteria
Otu01221	MBR	2.65	0.00313	Proteobacteria	Alphaproteobacteria	Sphingomonadales	Sphingomonadaceae	Novosphingobium
Otu01242	MBR	2.65	2.54e-06	Proteobacteria	Gammaproteobacteria	Oceanospirillales	Pseudohongiellaceae	Pseudohongiella
Otu01078	MBR	2.65	1.56e-05	Bacteroidota	Bacteroidia	Chitinophagales	Chitinophagaceae
Otu00405	OXI	2.65	0.000131	Firmicutes	Bacilli	Bacillales	Bacillaceae	Bacillus
Otu00974	OXI	2.65	5.03e-05	SAR324_clade(Marine_group_B)
Otu00624	OXI	2.64	0.00185	Bacteroidota	Bacteroidia	Sphingobacteriales	env.OPS_17
Otu00808	MBR	2.64	0.0011	Verrucomicrobiota	Verrucomicrobiae	Opitutales	Opitutaceae	Lacunisphaera
Otu00471	OXI	2.64	0.000423	Proteobacteria	Gammaproteobacteria	Burkholderiales	Comamonadaceae
Otu00823	MBR	2.64	1.57e-05	Proteobacteria	Gammaproteobacteria	Burkholderiales	Oxalobacteraceae
Otu00169	OXI	2.63	0.000357	Verrucomicrobiota	Verrucomicrobiae	Verrucomicrobiales	Rubritaleaceae	Luteolibacter
Otu00459	OXI	2.63	0.000203	Cyanobacteria	Vampirivibrionia	Obscuribacterales	Obscuribacteraceae
Otu00315	OXI	2.63	8.38e-05	Actinobacteriota	Acidimicrobiia	Microtrichales	Microtrichaceae	IMCC26207
Otu00909	PRI	2.63	0.0112	Bacteroidota	Bacteroidia	Bacteroidales	Tannerellaceae	Parabacteroides
Otu01547	OXI	2.63	0.00213	SAR324_clade(Marine_group_B)
Otu00263	OXI	2.62	0.00335	Proteobacteria	Alphaproteobacteria	Rhizobiales	Beijerinckiaceae	Methylorosula
Otu00368	OXI	2.62	0.000859	Actinobacteriota	Actinobacteria	Propionibacteriales	Nocardioidaceae	Marmoricola
Otu00830	OXI	2.62	0.00057	Proteobacteria	Gammaproteobacteria	Legionellales	Legionellaceae	Legionella
Otu00410	OXI	2.62	0.00356	Proteobacteria	Gammaproteobacteria	Gammaproteobacteria_Incertae_Sedis	Unknown_Family
Otu01080	MBR	2.62	4.5e-05	Bacteroidota	Bacteroidia	Cytophagales	Spirosomaceae	Lacihabitans
Otu01183	OXI	2.62	0.00103	Patescibacteria	Parcubacteria	Candidatus_Moranbacteria
Otu00291	OXI	2.62	0.000697	Bacteroidota	SJA-28
Otu00642	OXI	2.62	8.62e-05	Chloroflexi	KD4-96
Otu01309	OXI	2.62	0.00332	SAR324_clade(Marine_group_B)
Otu00689	MBR	2.61	0.00574	Bacteroidota	Bacteroidia	Sphingobacteriales	Sphingobacteriaceae	Pedobacter
Otu01568	OXI	2.61	0.00739	Proteobacteria	Alphaproteobacteria	Rickettsiales	Rickettsiaceae
Otu00044	PRI	2.61	0.000741	Firmicutes	Bacilli	Lactobacillales	Enterococcaceae	Enterococcus
Otu00817	MBR	2.61	2.12e-05	Proteobacteria	Alphaproteobacteria	Dongiales	Dongiaceae	Dongia
Otu00897	OXI	2.6	0.00429	Proteobacteria	Alphaproteobacteria	Tistrellales	Geminicoccaceae	Candidatus_Alysiosphaera
Otu00948	OXI	2.6	0.00147	Patescibacteria	Saccharimonadia	Saccharimonadales
Otu01315	MBR	2.6	8.61e-05	Proteobacteria	Alphaproteobacteria	Rickettsiales
Otu00562	MBR	2.6	0.00224	Proteobacteria	Alphaproteobacteria	Rhizobiales	Hyphomicrobiaceae
Otu01232	PRI	2.6	0.0111	Proteobacteria	Gammaproteobacteria	Pseudomonadales	Moraxellaceae	Acinetobacter
Otu00436	OXI	2.6	0.00148	Proteobacteria	Gammaproteobacteria	Legionellales	Legionellaceae	Legionella
Otu00924	OXI	2.6	0.000232	Proteobacteria	Alphaproteobacteria	Caulobacterales	Caulobacteraceae
Otu01299	OXI	2.6	7.1e-05	Patescibacteria	Parcubacteria	Candidatus_Kaiserbacteria
Otu00024	MBR	2.6	0.0162	Proteobacteria	Gammaproteobacteria	Burkholderiales	Comamonadaceae
Otu00676	PRI	2.6	0.0385	Bacteroidota	Bacteroidia	Bacteroidales	Rikenellaceae
Otu00347	OXI	2.59	0.00155	Nitrospirota	Nitrospiria	Nitrospirales	Nitrospiraceae	Nitrospira
Otu00745	OXI	2.59	0.00134	Actinobacteriota	Acidimicrobiia	Microtrichales
Otu00305	OXI	2.59	0.000443	Bacteroidota	Bacteroidia	Chitinophagales	uncultured Saprospiraceae
Otu01296	MBR	2.59	0.000426	Proteobacteria	Gammaproteobacteria	Burkholderiales	Comamonadaceae
Otu00989	PRI	2.58	0.0118	Campylobacterota	Campylobacteria	Campylobacterales	Arcobacteraceae
Otu00558	OXI	2.58	0.000227	Proteobacteria	Gammaproteobacteria	Burkholderiales	Nitrosomonadaceae	Ellin6067
Otu01004	OXI	2.58	0.000397	Bacteria_unclassified
Otu01705	OXI	2.57	0.0326	Patescibacteria	Saccharimonadia	Saccharimonadales
Otu00069	OXI	2.57	0.000296	Bacteroidota	Bacteroidia	Flavobacteriales	Flavobacteriaceae	Flavobacterium
Otu01648	OXI	2.57	0.00217	Verrucomicrobiota	Verrucomicrobiae	Chthoniobacterales	Terrimicrobiaceae	Terrimicrobium
Otu00882	MBR	2.57	0.000485	Campylobacterota	Campylobacteria	Campylobacterales	Sulfurospirillaceae	Sulfurospirillum
Otu01403	OXI	2.57	0.000633	Bacteria_unclassified
Otu01057	OXI	2.56	0.00123	Desulfobacterota	uncultured	uncultured_or	uncultured_fa
Otu01270	MBR	2.56	0.0189	Planctomycetota	Planctomycetes	Pirellulales	Pirellulaceae	Pir4_lineage
Otu01014	OXI	2.56	0.00738	Actinobacteriota	Actinobacteria	Corynebacteriales	Nocardiaceae	Gordonia
Otu01697	MBR	2.55	0.000426	Bacteroidota	Bacteroidia	Sphingobacteriales	KD3-93
Otu00378	OXI	2.55	0.000773	Bacteroidota	Bacteroidia	Chitinophagales	uncultured Saprospiraceae
Otu00852	MBR	2.55	0.00269	Proteobacteria	Gammaproteobacteria	Burkholderiales	Nitrosomonadaceae	DSSD61
Otu01104	MBR	2.55	0.000426	Bdellovibrionota	Bdellovibrionia	Bacteriovoracales	Bacteriovoracaceae	Peredibacter
Otu01283	OXI	2.55	0.000149	SAR324_clade(Marine_group_B)
Otu01735	OXI	2.55	0.0246	Patescibacteria	Parcubacteria
Otu00454	OXI	2.54	0.000276	Proteobacteria	Gammaproteobacteria	Xanthomonadales	Xanthomonadaceae	Arenimonas
Otu00284	OXI	2.54	9.27e-05	Proteobacteria	Alphaproteobacteria	Rhizobiales	uncultured Rhizobiales_Incertae_Sedis
Otu01200	OXI	2.54	0.00875	Verrucomicrobiota	Verrucomicrobiae	Opitutales	Puniceicoccaceae
Otu01449	MBR	2.54	0.000425	Patescibacteria	Parcubacteria	Candidatus_Campbellbacteria
Otu00400	OXI	2.54	0.000769	Planctomycetota
Otu00176	OXI	2.53	0.0175	Proteobacteria	Gammaproteobacteria	Xanthomonadales	Xanthomonadaceae	Arenimonas
Otu00373	OXI	2.53	0.000231	Proteobacteria	Alphaproteobacteria	Tistrellales	Geminicoccaceae	Candidatus_Alysiosphaera
Otu01056	MBR	2.53	5.03e-05	Proteobacteria	Alphaproteobacteria	Sphingomonadales	Sphingomonadaceae	Qipengyuania
Otu00873	OXI	2.53	0.00133	Myxococcota	Myxococcia	Myxococcales	Myxococcaceae	P3OB-42
Otu00068	MBR	2.53	0.00556	Actinobacteriota	Actinobacteria	Micrococcales	Microbacteriaceae
Otu01240	OXI	2.53	1.45e-05	Proteobacteria	Gammaproteobacteria	Legionellales	Legionellaceae	Legionella
Otu00180	MBR	2.53	0.000426	Bacteroidota	Bacteroidia	Chitinophagales	Chitinophagaceae	Lacibacter
Otu00908	PRI	2.53	0.0224	Bacteroidota	Bacteroidia	Bacteroidales	Bacteroidaceae	Bacteroides
Otu01303	OXI	2.53	0.0291	Bacteria_unclassified
Otu01034	MBR	2.52	9.63e-05	Proteobacteria	Alphaproteobacteria	Micavibrionales	uncultured
Otu00940	MBR	2.52	0.00339	Proteobacteria	Alphaproteobacteria	Caulobacterales	Hyphomonadaceae	SWB02
Otu01321	MBR	2.52	0.0055	Campylobacterota	Campylobacteria	Campylobacterales	Sulfurimonadaceae	Sulfuricurvum
Otu00075	OXI	2.52	0.00921	Proteobacteria	Gammaproteobacteria	Burkholderiales	Comamonadaceae
Otu01279	PRI	2.51	0.0296	Firmicutes	Negativicutes	Veillonellales-Selenomonadales	Veillonellaceae	Megasphaera
Otu00071	MBR	2.51	0.0171	Proteobacteria	Alphaproteobacteria	Rhizobiales	Beijerinckiaceae	Bosea
Otu00495	MBR	2.51	0.000176	Bacteroidota	Bacteroidia	Cytophagales	Microscillaceae	OLB12
Otu01159	OXI	2.51	0.00166	Patescibacteria	Parcubacteria	Candidatus_Nomurabacteria
Otu01133	OXI	2.51	0.00169	Proteobacteria	Alphaproteobacteria	Caedibacterales	Caedibacteraceae	Caedibacter
Otu00421	PRI	2.51	8.98e-05	Proteobacteria	Gammaproteobacteria	Burkholderiales	Rhodocyclaceae	Propionivibrio
Otu00736	OXI	2.51	0.00496	Proteobacteria	Gammaproteobacteria	Burkholderiales	Nitrosomonadaceae	Ellin6067
Otu00487	OXI	2.51	0.000254	Chloroflexi	Anaerolineae	1-20
Otu01606	OXI	2.51	0.000151	Myxococcota	bacteriap25
Otu00806	OXI	2.5	0.000455	Verrucomicrobiota	Verrucomicrobiae	Verrucomicrobiales	Rubritaleaceae	Luteolibacter
Otu00447	OXI	2.5	0.000366	Verrucomicrobiota	Verrucomicrobiae	Pedosphaerales	uncultured Pedosphaeraceae
Otu00486	OXI	2.5	0.00237	Proteobacteria	Gammaproteobacteria	Legionellales	Legionellaceae	Legionella
Otu00375	MBR	2.5	0.0152	Bacteroidota	Bacteroidia	Flavobacteriales	Flavobacteriaceae	Flavobacterium
Otu00837	OXI	2.49	0.00329	Actinobacteriota	Thermoleophilia	Gaiellales	Gaiellaceae	Gaiella
Otu00237	MBR	2.49	0.000426	Proteobacteria	Alphaproteobacteria	Caulobacterales	Caulobacteraceae	Phenylobacterium
Otu01969	OXI	2.49	0.00105	Patescibacteria	ABY1	Candidatus_Magasanikbacteria
Otu00798	OXI	2.48	0.00513	Actinobacteriota	Acidimicrobiia	uncultured
Otu00550	OXI	2.48	7.01e-05	Firmicutes	Clostridia	Peptostreptococcales-Tissierellales	Peptostreptococcaceae	Intestinibacter
Otu01126	MBR	2.48	8.61e-05	Bacteroidota	Bacteroidia	Flavobacteriales	NS9_marine_group
Otu00461	OXI	2.48	0.000142	Verrucomicrobiota	Chlamydiae	Chlamydiales	Parachlamydiaceae	Candidatus_Protochlamydia
Otu01483	MBR	2.48	1.56e-05	Patescibacteria	Parcubacteria	Candidatus_Kaiserbacteria
Otu00905	OXI	2.48	0.00149	Proteobacteria	Gammaproteobacteria	Burkholderiales	Burkholderiaceae	Lautropia
Otu01598	OXI	2.48	0.0196	SAR324_clade(Marine_group_B)
Otu00493	PRI	2.47	0.00835	Firmicutes	Negativicutes	Veillonellales-Selenomonadales	Sporomusaceae
Otu01194	MBR	2.47	1.57e-05	Bacteroidota	Bacteroidia	Sphingobacteriales	NS11-12_marine_group
Otu00254	MBR	2.47	0.000643	Actinobacteriota	Actinobacteria	Corynebacteriales	Nocardiaceae	Rhodococcus
Otu01215	MBR	2.47	8.58e-05	Verrucomicrobiota	Chlamydiae	Chlamydiales	Parachlamydiaceae	Neochlamydia
Otu00256	MBR	2.47	0.000425	Bacteroidota	Bacteroidia	Chitinophagales	uncultured Saprospiraceae
Otu00581	PRI	2.47	3.59e-05	Bacteroidota	Bacteroidia	Bacteroidales	Paludibacteraceae
Otu00437	OXI	2.47	0.000867	Bdellovibrionota	Oligoflexia	0319-6G20
Otu00979	OXI	2.47	0.000451	Patescibacteria	Parcubacteria
Otu00253	OXI	2.46	0.000637	Bacteroidota	Bacteroidia	Cytophagales	uncultured Microscillaceae
Otu01079	MBR	2.46	0.0124	Bacteroidota	Bacteroidia	Chitinophagales	Chitinophagaceae	Edaphobaculum
Otu01305	OXI	2.46	0.00175	Patescibacteria	Gracilibacteria	Candidatus_Peregrinibacteria
Otu01604	MBR	2.46	0.000425	Bacteria_unclassified
Otu00457	OXI	2.45	0.0245	Bacteroidota	Bacteroidia	uncultured Chitinophagales
Otu00497	MBR	2.45	1.57e-05	Bacteroidota	Bacteroidia	Sphingobacteriales	NS11-12_marine_group
Otu00866	PRI	2.45	0.00312	Firmicutes	Bacilli	Erysipelotrichales	Erysipelotrichaceae	Holdemanella
Otu01158	PRI	2.45	0.0189	Firmicutes	Bacilli	Erysipelotrichales	Erysipelatoclostridiaceae	Catenibacterium
Otu00560	OXI	2.45	0.0064	Bacteroidota	Bacteroidia	Chitinophagales
Otu00793	OXI	2.45	0.000184	Patescibacteria	Gracilibacteria	Candidatus_Peregrinibacteria
Otu01549	OXI	2.45	0.00594	Bacteria_unclassified
Otu00501	OXI	2.44	4.52e-05	Chloroflexi	Chloroflexia	Thermomicrobiales	JG30-KF-CM45
Otu01591	OXI	2.44	0.0163	Chloroflexi	Anaerolineae	SBR1031
Otu01520	MBR	2.44	0.000426	Proteobacteria	Alphaproteobacteria	Rickettsiales	SM2D12
Otu00521	OXI	2.44	4.04e-05	Proteobacteria	Alphaproteobacteria	Rhizobiales	Hyphomicrobiaceae
Otu00398	OXI	2.44	0.00169	Cyanobacteria	Vampirivibrionia	Obscuribacterales	Obscuribacteraceae	Candidatus_Obscuribacter
Otu00312	OXI	2.44	4.48e-05	Planctomycetota	Planctomycetes	Gemmatales	uncultured Gemmataceae
Otu01171	OXI	2.44	0.00126	Patescibacteria	Parcubacteria	Candidatus_Kaiserbacteria
Otu01669	OXI	2.44	0.00464	Patescibacteria	Parcubacteria	Candidatus_Campbellbacteria
Otu01107	OXI	2.43	0.0404	Actinobacteriota	Thermoleophilia	Solirubrobacterales	67-14
Otu01436	MBR	2.43	0.00144	Planctomycetota	Planctomycetes	Pirellulales	Pirellulaceae
Otu00634	OXI	2.43	0.0031	Proteobacteria	Gammaproteobacteria	Oceanospirillales	Oceanospirillales_unclassified
Otu01081	OXI	2.43	0.00105	Proteobacteria	Alphaproteobacteria	Holosporales	Holosporaceae
Otu00428	MBR	2.43	0.000425	Planctomycetota	Planctomycetes	Gemmatales	Gemmataceae	Gemmata
Otu00344	OXI	2.43	0.0118	Bacteroidota	Bacteroidia	Cytophagales	Microscillaceae	OLB12
Otu00755	OXI	2.43	0.00233	Proteobacteria	Gammaproteobacteria	Cellvibrionales	Cellvibrionaceae	Cellvibrio
Otu01408	OXI	2.43	0.00936	Patescibacteria	ABY1	Candidatus_Uhrbacteria
Otu01596	OXI	2.43	0.000189	Patescibacteria	Microgenomatia	Candidatus_Collierbacteria
Otu00520	OXI	2.43	0.002	Acidobacteriota	Blastocatellia	Blastocatellales	Blastocatellaceae
Otu00446	OXI	2.42	0.000335	Actinobacteriota	Acidimicrobiia	uncultured Microtrichales
Otu00734	MBR	2.42	1.57e-05	Proteobacteria	Gammaproteobacteria	Tenderiales	Tenderiaceae	Candidatus_Tenderia
Otu00277	OXI	2.42	0.000117	Proteobacteria	Alphaproteobacteria	Rhizobiales	Rhizobiales_Incertae_Sedis	Nordella
Otu01188	MBR	2.42	0.000871	Bdellovibrionota	Oligoflexia	Oligoflexales	uncultured
Otu00970	MBR	2.42	0.0261	Proteobacteria	Gammaproteobacteria	Legionellales	Legionellaceae	Legionella
Otu01091	PRI	2.42	0.0112	Firmicutes	Clostridia	Lachnospirales	Lachnospiraceae	Blautia
Otu01797	OXI	2.42	0.00509	Proteobacteria	Gammaproteobacteria	CHAB-XI-27
Otu01535	OXI	2.42	6.61e-05	Patescibacteria	Microgenomatia	Candidatus_Collierbacteria
Otu01393	OXI	2.42	0.00473	Proteobacteria	Gammaproteobacteria	Burkholderiales	Burkholderiaceae
Otu00845	PRI	2.42	0.0245	Bacteroidota	Bacteroidia	Bacteroidales	Bacteroidaceae	Bacteroides
Otu01631	OXI	2.42	0.00015	Bacteria_unclassified
Otu00399	OXI	2.41	0.00048	Verrucomicrobiota	Verrucomicrobiae	Verrucomicrobiales	Rubritaleaceae	Luteolibacter
Otu00920	OXI	2.41	0.000384	Proteobacteria	Alphaproteobacteria	Sphingomonadales	Sphingomonadaceae	Novosphingobium
Otu01179	OXI	2.41	0.000465	Actinobacteriota	Acidimicrobiia	Microtrichales
Otu01256	PRI	2.41	0.0126	Firmicutes	Clostridia	Lachnospirales	Lachnospiraceae
Otu00327	MBR	2.41	2.56e-06	Bacteroidota	Bacteroidia	Flavobacteriales	Flavobacteriaceae	Flavobacterium
Otu00259	PRI	2.41	0.0278	Proteobacteria	Gammaproteobacteria	Burkholderiales	Neisseriaceae
Otu00300	OXI	2.4	0.000722	Proteobacteria	Alphaproteobacteria	Rhizobiales	Hyphomicrobiaceae	Pedomicrobium
Otu00847	OXI	2.4	0.000105	Planctomycetota	Planctomycetes	Pirellulales	Pirellulaceae
Otu00966	MBR	2.4	0.00102	Bacteroidota	Bacteroidia	Cytophagales	Microscillaceae
Otu00519	MBR	2.4	0.00143	Bdellovibrionota	Bdellovibrionia	Bdellovibrionales	Bdellovibrionaceae	Bdellovibrio
Otu00957	MBR	2.39	5.03e-05	Bacteroidota	Bacteroidia	Sphingobacteriales	NS11-12_marine_group
Otu00333	PRI	2.39	6.66e-05	Firmicutes	Clostridia	Peptostreptococcales-Tissierellales	Peptostreptococcaceae	Acetoanaerobium
Otu00800	MBR	2.39	2.55e-06	Patescibacteria	Gracilibacteria	JGI_0000069-P22
Otu00386	OXI	2.39	0.000357	Planctomycetota	Planctomycetes	Gemmatales	Gemmataceae	Fimbriiglobus
Otu01621	PRI	2.39	0.0081	Proteobacteria	Gammaproteobacteria	Diplorickettsiales	Diplorickettsiaceae
Otu00554	MBR	2.39	8.61e-05	Bacteroidota	Bacteroidia	Chitinophagales	Saprospiraceae
Otu01252	PRI	2.39	0.0192	Campylobacterota	Campylobacteria	Campylobacterales	Arcobacteraceae
Otu00865	OXI	2.39	0.0209	Bacteroidota	Bacteroidia	Bacteroidales	Prevotellaceae	Prevotella
Otu00695	OXI	2.39	0.00271	NB1-j
Otu01625	OXI	2.39	0.00237	Proteobacteria
Otu01205	MBR	2.38	0.00185	Bacteroidota	Bacteroidia	Sphingobacteriales	env.OPS_17
Otu01482	PRI	2.38	0.00119	Proteobacteria	Alphaproteobacteria	Rhizobiales	Xanthobacteraceae
Otu01118	OXI	2.38	0.00275	Myxococcota	Polyangia	Polyangiales	Phaselicystidaceae	Phaselicystis
Otu01843	MBR	2.38	0.00143	Planctomycetota	Planctomycetes	Pirellulales	Pirellulaceae
Otu01507	OXI	2.38	0.0119	Gemmatimonadota	Gemmatimonadetes	Gemmatimonadales	Gemmatimonadaceae
Otu00591	OXI	2.38	0.000555	Proteobacteria	Gammaproteobacteria	Gammaproteobacteria_Incertae_Sedis
Otu00939	OXI	2.38	0.00118	Verrucomicrobiota	Chlamydiae	Chlamydiales	Criblamydiaceae
Otu01597	OXI	2.38	0.00148	Patescibacteria	Microgenomatia	Candidatus_Pacebacteria
Otu01683	OXI	2.38	6.76e-05	Patescibacteria	ABY1	Candidatus_Kuenenbacteria
Otu01138	OXI	2.38	0.0251	NB1-j
Otu01793	MBR	2.38	0.00143	Planctomycetota	OM190
Otu01055	PRI	2.37	0.000189	Desulfobacterota	Desulfovibrionia	Desulfovibrionales	Desulfomicrobiaceae	Desulfomicrobium
Otu00877	OXI	2.37	0.000462	Bacteroidota	Bacteroidia	Chitinophagales	Saprospiraceae
Otu00485	OXI	2.36	0.0174	Verrucomicrobiota	Verrucomicrobiae	Verrucomicrobiales	Rubritaleaceae	Luteolibacter
Otu01540	OXI	2.36	0.009	Patescibacteria	Saccharimonadia	Saccharimonadales
Otu00942	MBR	2.36	0.000425	Proteobacteria	Alphaproteobacteria	Rhodobacterales	Rhodobacteraceae	Thioclava
Otu00935	OXI	2.36	0.00492	Firmicutes	Clostridia	Peptostreptococcales-Tissierellales	Peptostreptococcaceae	Terrisporobacter
Otu01466	OXI	2.36	1.4e-05	Bdellovibrionota	Oligoflexia	Oligoflexales	uncultured
Otu01318	MBR	2.36	0.00556	Bacteroidota	Bacteroidia	Flavobacteriales	Flavobacteriaceae	Flavobacterium
Otu01934	MBR	2.36	0.000426	Proteobacteria	Gammaproteobacteria	Diplorickettsiales	Diplorickettsiaceae
Otu01484	PRI	2.36	0.00607	SAR324_clade(Marine_group_B)
Otu01487	OXI	2.36	0.000176	Patescibacteria	Gracilibacteria
Otu01639	OXI	2.36	7.32e-05	Bacteria_unclassified
Otu01894	MBR	2.35	9.4e-05	Bacteroidota	Bacteroidia	Sphingobacteriales	NS11-12_marine_group
Otu01214	OXI	2.35	0.00119	Proteobacteria	Alphaproteobacteria	Rhizobiales	Pleomorphomonadaceae
Otu02081	MBR	2.35	0.0227	Proteobacteria	Gammaproteobacteria	PLTA13
Otu00504	OXI	2.35	0.000123	Actinobacteriota	Acidimicrobiia	Microtrichales	Iamiaceae	Iamia
Otu01588	MBR	2.35	0.000426	Proteobacteria	Alphaproteobacteria	Micavibrionales	Micavibrionaceae
Otu00357	PRI	2.35	3.65e-05	Firmicutes	Clostridia	Eubacteriales	Eubacteriaceae	Acetobacterium
Otu02088	MBR	2.35	0.000421	Verrucomicrobiota	Chlamydiae	Chlamydiales	Parachlamydiaceae
Otu00821	OXI	2.35	0.00108	Patescibacteria	ABY1	Candidatus_Magasanikbacteria
Otu01663	MBR	2.35	2.62e-05	Proteobacteria	Gammaproteobacteria	Burkholderiales
Otu01915	MBR	2.35	1.56e-05	Bdellovibrionota	Bdellovibrionia	Bacteriovoracales	Bacteriovoracaceae
Otu01725	OXI	2.35	0.000831	SAR324_clade(Marine_group_B)
Otu00986	OXI	2.34	0.00491	Planctomycetota	Planctomycetes	Planctomycetales	uncultured
Otu00441	MBR	2.34	0.000587	Planctomycetota	Planctomycetes	Pirellulales	Pirellulaceae	Pir4_lineage
Otu00801	OXI	2.34	0.000138	Planctomycetota	Planctomycetes	Pirellulales	Pirellulaceae	Pir4_lineage
Otu00726	OXI	2.34	0.0038	Proteobacteria	Gammaproteobacteria	Legionellales	Legionellaceae	Legionella
Otu01306	MBR	2.34	0.00996	Planctomycetota	Planctomycetes	Gemmatales	Gemmataceae	Gemmata
Otu02079	OXI	2.34	0.0107	Patescibacteria	Gracilibacteria	Candidatus_Peregrinibacteria
Otu01996	OXI	2.34	0.000556	Patescibacteria	Parcubacteria	Candidatus_Campbellbacteria
Otu00659	OXI	2.34	0.000308	Acidobacteriota	Blastocatellia	Blastocatellales	Blastocatellaceae
Otu00033	MBR	2.33	0.00175	Proteobacteria	Gammaproteobacteria	Xanthomonadales	Xanthomonadaceae	Luteimonas
Otu02127	MBR	2.33	0.00143	Bacteroidota	Bacteroidia	Sphingobacteriales	env.OPS_17
Otu01059	MBR	2.33	2.56e-06	Proteobacteria	Alphaproteobacteria	Rhizobiales	Rhizobiales_Incertae_Sedis	Phreatobacter
Otu02430	MBR	2.33	0.000426	Proteobacteria	Gammaproteobacteria	Legionellales	Legionellaceae	Legionella
Otu00536	MBR	2.33	0.000425	Planctomycetota	Planctomycetes	Isosphaerales	Isosphaeraceae	Tundrisphaera
Otu00651	OXI	2.33	0.000567	Bacteroidota	Bacteroidia	Chitinophagales	uncultured
Otu01832	MBR	2.33	0.000425	Bacteroidota	Bacteroidia	Chitinophagales	Chitinophagaceae	Terrimonas
Otu01452	OXI	2.33	0.00299	Proteobacteria	Gammaproteobacteria
Otu01737	OXI	2.33	0.00698	Proteobacteria	Gammaproteobacteria
Otu01928	OXI	2.33	0.000548	Bacteria_unclassified
Otu02415	OXI	2.33	0.00706	Bacteria_unclassified
Otu00261	OXI	2.32	0.00247	Proteobacteria	Gammaproteobacteria	Thiotrichales	Thiotrichaceae	Thiothrix
Otu01357	MBR	2.32	0.00191	Bacteroidota	Bacteroidia	Sphingobacteriales	NS11-12_marine_group
Otu01268	OXI	2.32	0.000453	Proteobacteria	Alphaproteobacteria	Rickettsiales	SM2D12
Otu00308	OXI	2.32	0.00135	Proteobacteria	Alphaproteobacteria	Rhodobacterales	Rhodobacteraceae	Amaricoccus
Otu00867	OXI	2.32	0.000278	Proteobacteria	Gammaproteobacteria	Legionellales	Legionellaceae	Legionella
Otu01633	OXI	2.32	0.00164	Proteobacteria	Gammaproteobacteria	Legionellales	Legionellaceae	Legionella
Otu00787	MBR	2.32	0.00198	Hydrogenedentes	Hydrogenedentia	Hydrogenedentiales	Hydrogenedensaceae
Otu01822	MBR	2.32	0.00355	Proteobacteria	Gammaproteobacteria	Diplorickettsiales	Diplorickettsiaceae	Aquicella
Otu00534	OXI	2.32	0.000507	Proteobacteria	Alphaproteobacteria	Caulobacterales	Hyphomonadaceae	SWB02
Otu02114	OXI	2.32	1.28e-05	Patescibacteria	ABY1	Candidatus_Magasanikbacteria
Otu00684	MBR	2.32	1.57e-05	Bdellovibrionota	Bdellovibrionia	Bacteriovoracales	Bacteriovoracaceae	Peredibacter
Otu01538	PRI	2.31	0.00239	Spirochaetota	Spirochaetia	Spirochaetales	Spirochaetaceae	Treponema
Otu00949	MBR	2.31	0.0251	Proteobacteria	Alphaproteobacteria	Rhodobacterales	Rhodobacteraceae
Otu01155	OXI	2.31	0.0279	Planctomycetota	Planctomycetes	Planctomycetales	uncultured
Otu00349	OXI	2.31	0.00145	Proteobacteria	Gammaproteobacteria	Oceanospirillales	Halomonadaceae	HdN1
Otu01064	OXI	2.31	0.000121	Actinobacteriota	Acidimicrobiia	Microtrichales	Ilumatobacteraceae	CL500-29_marine_group
Otu01249	OXI	2.31	0.0034	Patescibacteria	Gracilibacteria
Otu01698	OXI	2.31	0.000204	SAR324_clade(Marine_group_B)
Otu02279	OXI	2.31	0.0202	Bacteria_unclassified
Otu01132	MBR	2.3	0.00106	Acidobacteriota	Vicinamibacteria	Vicinamibacterales	uncultured
Otu00296	MBR	2.3	0.00481	Proteobacteria	Alphaproteobacteria	Rhizobiales	Hyphomicrobiaceae	Hyphomicrobium
Otu00313	OXI	2.3	0.00289	Planctomycetota	Planctomycetes	Planctomycetales	uncultured Rubinisphaeraceae
Otu01678	PRI	2.3	0.0189	Firmicutes	Clostridia	Lachnospirales	Lachnospiraceae	Blautia
Otu00973	OXI	2.3	0.00133	Myxococcota	Polyangia	Haliangiales	Haliangiaceae	Haliangium
Otu01908	MBR	2.3	0.00245	Proteobacteria	Gammaproteobacteria	Burkholderiales	Nitrosomonadaceae
Otu00770	OXI	2.29	0.0034	Acidobacteriota	Vicinamibacteria	Vicinamibacterales	Vicinamibacteraceae
Otu02292	MBR	2.29	0.000426	Proteobacteria	Alphaproteobacteria	Rhizobiales	Xanthobacteraceae	Pseudolabrys
Otu00538	MBR	2.29	0.00503	Planctomycetota	Planctomycetes	Planctomycetales	Rubinisphaeraceae
Otu00956	OXI	2.29	0.00302	Actinobacteriota	Acidimicrobiia	Microtrichales
Otu00189	OXI	2.29	0.000193	Planctomycetota	Planctomycetes	Gemmatales	uncultured Gemmataceae
Otu01672	OXI	2.29	0.00103	Proteobacteria	Gammaproteobacteria	Diplorickettsiales	Diplorickettsiaceae
Otu02103	MBR	2.29	0.00404	Verrucomicrobiota	Chlamydiae	Chlamydiales	cvE6
Otu00411	OXI	2.29	0.00187	Proteobacteria	Alphaproteobacteria	Caulobacterales	Hyphomonadaceae	Hyphomonas
Otu01543	MBR	2.29	0.00109	Proteobacteria	Alphaproteobacteria	Caulobacterales	Caulobacteraceae	Caulobacter
Otu01433	OXI	2.29	0.00926	Patescibacteria	Parcubacteria
Otu00468	OXI	2.28	0.000801	Acidobacteriota	Vicinamibacteria	Subgroup_17
Otu00432	MBR	2.28	0.00316	Proteobacteria	Alphaproteobacteria	Sphingomonadales	Sphingomonadaceae	Sphingobium
Otu01077	MBR	2.28	0.000715	Proteobacteria	Alphaproteobacteria	Sphingomonadales	Sphingomonadaceae
Otu00128	MBR	2.28	0.00688	Proteobacteria	Gammaproteobacteria	Pseudomonadales	Moraxellaceae	Alkanindiges
Otu01530	OXI	2.28	0.00166	Patescibacteria	Gracilibacteria	Absconditabacteriales_(SR1)
Otu00859	OXI	2.28	0.00123	Proteobacteria	Alphaproteobacteria
Otu02331	MBR	2.28	0.00191	Bacteria_unclassified
Otu00161	MBR	2.27	0.0291	Proteobacteria	Alphaproteobacteria	Rhizobiales	Rhizobiaceae
Otu00396	OXI	2.27	4.58e-05	Proteobacteria	Alphaproteobacteria	Rhizobiales	Hyphomicrobiaceae	Hyphomicrobium
Otu02110	MBR	2.27	0.00192	Proteobacteria	Alphaproteobacteria	Rhizobiales	Xanthobacteraceae
Otu01042	OXI	2.27	0.00406	Firmicutes	Bacilli	Erysipelotrichales	Erysipelotrichaceae
Otu01841	OXI	2.27	0.0188	Patescibacteria	Parcubacteria	Candidatus_Kaiserbacteria
Otu01160	OXI	2.27	0.000141	Patescibacteria	Gracilibacteria	Absconditabacteriales_(SR1)
Otu01406	PRI	2.26	0.000692	Synergistota	Synergistia	Synergistales	Synergistaceae
Otu01390	PRI	2.26	0.018	Firmicutes	Clostridia	Lachnospirales	Lachnospiraceae
Otu02029	OXI	2.26	0.00202	Patescibacteria	Gracilibacteria	Gracilibacteria_or
Otu00484	OXI	2.26	0.000305	Bacteroidota	Bacteroidia	Chitinophagales	Chitinophagaceae
Otu01410	OXI	2.26	0.00339	Proteobacteria	Gammaproteobacteria	Burkholderiales	Neisseriaceae
Otu00443	OXI	2.25	0.00125	Chloroflexi	Anaerolineae	Caldilineales	uncultured Caldilineaceae
Otu01791	MBR	2.25	0.000426	Bacteroidota	Bacteroidia	Bacteroidales
Otu01560	OXI	2.25	0.00508	SAR324_clade(Marine_group_B)
Otu00962	MBR	2.24	0.00143	Bacteroidota	Bacteroidia	Sphingobacteriales	NS11-12_marine_group
Otu00971	OXI	2.24	0.00297	Actinobacteriota	Acidimicrobiia	Microtrichales	Microtrichales_unclassified
Otu00589	MBR	2.24	9.34e-06	Proteobacteria	Alphaproteobacteria	Caulobacterales	Caulobacteraceae	Caulobacter
Otu00831	OXI	2.23	0.0123	Planctomycetota	Planctomycetes	Pirellulales	Pirellulaceae	Blastopirellula
Otu01304	OXI	2.23	0.00389	Planctomycetota	Planctomycetes	Pirellulales	Pirellulaceae	Rhodopirellula
Otu00236	OXI	2.23	0.00782	Bacteroidota	Bacteroidia	Flavobacteriales	NS9_marine_group
Otu01609	OXI	2.23	4.01e-05	Patescibacteria	ABY1	Candidatus_Magasanikbacteria
Otu00573	OXI	2.23	0.000167	Chloroflexi	Anaerolineae	Caldilineales	Caldilineaceae
Otu02090	OXI	2.23	0.00179	Dependentiae	Babeliae	Babeliales	Babeliaceae
Otu00911	OXI	2.23	0.00106	Patescibacteria	Gracilibacteria	Absconditabacteriales_(SR1)
Otu01488	OXI	2.23	0.000968	Bacteria_unclassified
Otu01940	OXI	2.23	0.000477	Bacteria_unclassified
Otu01615	OXI	2.22	0.0124	Proteobacteria	Gammaproteobacteria	PLTA13
Otu01595	MBR	2.22	0.00061	Planctomycetota	Phycisphaerae	Phycisphaerales	Phycisphaeraceae	SM1A02
Otu01024	OXI	2.22	0.0231	Proteobacteria	Alphaproteobacteria	Paracaedibacterales	Paracaedibacteraceae	Candidatus_Paracaedibacter
Otu00481	OXI	2.22	0.000598	Actinobacteriota	Acidimicrobiia	Microtrichales	Microtrichales_unclassified
Otu01036	OXI	2.22	0.016	Actinobacteriota	Acidimicrobiia	Microtrichales
Otu01772	MBR	2.22	0.00154	Proteobacteria	Gammaproteobacteria	Ga0077536
Otu01358	OXI	2.22	0.00153	Armatimonadota	Fimbriimonadia	Fimbriimonadales	Fimbriimonadaceae
Otu00876	MBR	2.22	0.00192	Bacteroidota	Bacteroidia	Chitinophagales	Saprospiraceae
Otu02347	MBR	2.22	0.000425	Proteobacteria	Gammaproteobacteria	Burkholderiales	Comamonadaceae
Otu02494	OXI	2.22	0.00409	Patescibacteria	Parcubacteria
Otu01129	OXI	2.21	0.00129	Actinobacteriota	Thermoleophilia	Solirubrobacterales	67-14
Otu01800	OXI	2.21	0.00287	Planctomycetota	Planctomycetes	Pirellulales	Pirellulaceae
Otu00210	OXI	2.21	0.0127	Myxococcota	Polyangia	Nannocystales	Nannocystaceae	Nannocystis
Otu00566	OXI	2.21	0.00115	Proteobacteria	Alphaproteobacteria	Micavibrionales
Otu01052	OXI	2.21	0.00122	Bacteroidota	Bacteroidia	Chitinophagales	Chitinophagaceae	Ferruginibacter
Otu01939	MBR	2.21	0.0088	Proteobacteria	Alphaproteobacteria	Caulobacterales	Hyphomonadaceae	SWB02
Otu02134	MBR	2.21	0.00106	Cyanobacteria	Sericytochromatia
Otu00631	OXI	2.2	0.001	Bacteroidota	Bacteroidia	Sphingobacteriales	AKYH767
Otu00374	MBR	2.2	1.56e-05	Proteobacteria	Alphaproteobacteria	Rhizobiales	Beijerinckiaceae	Methylobacterium-Methylorubrum
Otu01349	PRI	2.2	0.0184	Proteobacteria	Gammaproteobacteria	Cardiobacteriales	Wohlfahrtiimonadaceae	Ignatzschineria
Otu01965	MBR	2.2	1.55e-05	Bdellovibrionota	Bdellovibrionia	Bdellovibrionales	Bdellovibrionaceae	Bdellovibrio
Otu01747	PRI	2.2	0.0473	Bacteroidota	Bacteroidia	Bacteroidales	Bacteroidaceae	Bacteroides
Otu02288	MBR	2.2	0.00191	Cyanobacteria	Sericytochromatia
Otu00607	OXI	2.19	0.000688	Verrucomicrobiota	Verrucomicrobiae	Verrucomicrobiales	Verrucomicrobiaceae
Otu01852	PRI	2.19	0.00096	Firmicutes	Negativicutes	Veillonellales-Selenomonadales	Sporomusaceae	Pelosinus
Otu00234	OXI	2.19	0.00117	Planctomycetota	Planctomycetes	uncultured Planctomycetales
Otu01988	OXI	2.19	6.67e-05	Planctomycetota	Phycisphaerae	Phycisphaerales	Phycisphaeraceae
Otu00732	OXI	2.19	0.000537	Actinobacteriota	Acidimicrobiia	Microtrichales	Microtrichaceae	Sva0996_marine_group
Otu00813	OXI	2.19	0.00169	Actinobacteriota	Acidimicrobiia	Microtrichales	uncultured
Otu01776	OXI	2.19	2.58e-05	Proteobacteria	Gammaproteobacteria	Legionellales	Legionellaceae	Legionella
Otu00913	OXI	2.19	0.000433	Bacteroidota	Bacteroidia	Cytophagales	Microscillaceae
Otu01018	OXI	2.19	0.00519	Verrucomicrobiota	Chlamydiae	Chlamydiales	Parachlamydiaceae	Candidatus_Protochlamydia
Otu00379	OXI	2.19	0.00169	Bacteroidota	Bacteroidia	Chitinophagales	uncultured Saprospiraceae
Otu01418	OXI	2.19	0.000266	Patescibacteria	Gracilibacteria	Candidatus_Peribacteria
Otu02607	OXI	2.19	0.00115	Patescibacteria	ABY1	Candidatus_Kerfeldbacteria
Otu02224	OXI	2.19	0.00052	Patescibacteria	Gracilibacteria	Absconditabacteriales_(SR1)
Otu01813	OXI	2.19	3.15e-05	Patescibacteria	Parcubacteria
Otu02329	OXI	2.19	0.00214	Bacteria_unclassified
Otu02565	MBR	2.18	0.00294	Bacteroidota	Bacteroidia	Sphingobacteriales	env.OPS_17
Otu00549	OXI	2.18	0.000258	Proteobacteria	Alphaproteobacteria	Rhizobiales	Devosiaceae
Otu00915	OXI	2.18	0.000278	Proteobacteria	Gammaproteobacteria	R7C24
Otu01781	MBR	2.18	0.00382	Planctomycetota	Planctomycetes	Planctomycetales	uncultured
Otu00524	OXI	2.18	0.00342	Verrucomicrobiota	Verrucomicrobiae	Pedosphaerales	Pedosphaeraceae	SH3-11
Otu02171	OXI	2.18	0.00867	Gemmatimonadota	Gemmatimonadetes	Gemmatimonadales	Gemmatimonadaceae
Otu00677	OXI	2.18	0.00103	Bacteroidota	Bacteroidia	Cytophagales	Microscillaceae
Otu00414	OXI	2.18	0.00133	Acidobacteriota	Blastocatellia	Blastocatellales	Blastocatellaceae	Stenotrophobacter
Otu01344	OXI	2.18	0.012	Chloroflexi	Anaerolineae	Ardenticatenales	uncultured
Otu00737	OXI	2.18	0.000303	Latescibacterota
Otu01384	MBR	2.18	0.00887	Bacteria_unclassified
Otu01695	MBR	2.18	0.00143	Bacteroidota	Bacteroidia
Otu01827	OXI	2.18	0.00118	Bacteria_unclassified
Otu00452	OXI	2.17	0.018	Proteobacteria	Alphaproteobacteria	Paracaedibacterales	Paracaedibacteraceae	Candidatus_Paracaedibacter
Otu02497	MBR	2.17	8.56e-05	Proteobacteria	Gammaproteobacteria	Gammaproteobacteria_Incertae_Sedis	Unknown_Family	Candidatus_Ovatusbacter
Otu00720	MBR	2.16	0.00209	Bacteroidota	Bacteroidia	Sphingobacteriales	env.OPS_17
Otu02095	OXI	2.16	0.0018	Patescibacteria	Saccharimonadia	Saccharimonadales
Otu00498	OXI	2.16	0.0204	Actinobacteriota	Actinobacteria	Propionibacteriales	Nocardioidaceae	Aeromicrobium
Otu00902	OXI	2.16	0.0177	Firmicutes	Clostridia	Peptostreptococcales-Tissierellales	Anaerovoracaceae	Anaerovorax
Otu02067	PRI	2.16	0.00148	Desulfobacterota	Desulfovibrionia	Desulfovibrionales	Desulfovibrionaceae	Bilophila
Otu01184	PRI	2.16	0.00152	Bacteroidota	Bacteroidia	Bacteroidales	Bacteroidaceae	Bacteroides
Otu02124	MBR	2.15	2.54e-06	Proteobacteria	Alphaproteobacteria	Rhodospirillales	uncultured
Otu02524	OXI	2.15	0.000872	Proteobacteria	Alphaproteobacteria	Paracaedibacterales	Paracaedibacteraceae
Otu00841	OXI	2.15	0.0139	Proteobacteria	Gammaproteobacteria	Legionellales	Legionellaceae	Legionella
Otu00449	MBR	2.15	5.56e-05	Myxococcota	Polyangia	Haliangiales	Haliangiaceae	Haliangium
Otu00091	OXI	2.15	0.0265	Bacteroidota	Bacteroidia	Chitinophagales	Saprospiraceae	Haliscomenobacter
Otu02651	MBR	2.15	0.00856	Proteobacteria	Alphaproteobacteria
Otu01563	MBR	2.14	0.000279	Bacteroidota	Bacteroidia	Sphingobacteriales	KD3-93
Otu00820	OXI	2.14	0.00096	Planctomycetota	Planctomycetes	Pirellulales	Pirellulaceae
Otu02500	MBR	2.14	0.000491	Verrucomicrobiota	Omnitrophia	Omnitrophales	Omnitrophaceae	Candidatus_Omnitrophus
Otu01623	OXI	2.14	3.64e-05	Proteobacteria	Gammaproteobacteria	Legionellales	Legionellaceae	Legionella
Otu00887	MBR	2.14	7.43e-06	Patescibacteria	Gracilibacteria	JGI_0000069-P22
Otu00406	OXI	2.14	0.000593	Verrucomicrobiota	Chlamydiae	Chlamydiales	Parachlamydiaceae	Candidatus_Protochlamydia
Otu00345	MBR	2.14	0.00174	WPS-2
Otu02352	OXI	2.14	0.0018	Bacteria_unclassified
Otu02519	OXI	2.14	0.00719	Bacteria_unclassified
Otu01713	OXI	2.13	0.0342	Actinobacteriota	Acidimicrobiia	Microtrichales	Ilumatobacteraceae	Ilumatobacter
Otu01098	PRI	2.13	0.00203	Firmicutes	Bacilli	Lactobacillales	Streptococcaceae	Streptococcus
Otu01936	MBR	2.13	0.00192	Proteobacteria	Gammaproteobacteria	Gammaproteobacteria_Incertae_Sedis	Unknown_Family
Otu00233	OXI	2.13	0.00259	Verrucomicrobiota	Chlamydiae	Chlamydiales	Parachlamydiaceae	Neochlamydia
Otu00470	MBR	2.13	0.000425	Verrucomicrobiota	Chlamydiae	Chlamydiales	Parachlamydiaceae	Candidatus_Protochlamydia
Otu02477	MBR	2.13	0.00191	Bacteroidota	Bacteroidia	Chitinophagales	Saprospiraceae	Phaeodactylibacter
Otu02204	MBR	2.13	0.00192	Bdellovibrionota	Bdellovibrionia	Bdellovibrionales	Bdellovibrionaceae	Bdellovibrio
Otu01391	MBR	2.13	0.00197	Acidobacteriota	Acidobacteriae	Acidobacteriae_or	Acidobacteriae_fa	Paludibaculum
Otu01573	OXI	2.12	0.00596	Chloroflexi	Chloroflexia	Thermomicrobiales	JG30-KF-CM45
Otu03023	MBR	2.12	0.000425	Proteobacteria	Gammaproteobacteria	Steroidobacterales	Steroidobacteraceae
Otu02175	OXI	2.12	0.00254	Proteobacteria	Alphaproteobacteria	Rickettsiales	Rickettsiaceae
Otu02580	MBR	2.12	0.00192	Proteobacteria	Alphaproteobacteria	Rickettsiales	SM2D12
Otu00961	OXI	2.12	0.000613	Planctomycetota	Planctomycetes	Pirellulales	Pirellulaceae	Pir4_lineage
Otu02052	MBR	2.12	8.56e-05	Verrucomicrobiota	Verrucomicrobiae	Pedosphaerales	Pedosphaeraceae	DEV114
Otu02770	MBR	2.12	0.00192	Myxococcota	Polyangia	Haliangiales	Haliangiaceae	Haliangium
Otu01115	OXI	2.12	0.0317	Proteobacteria	Gammaproteobacteria	Gammaproteobacteria_Incertae_Sedis	Unknown_Family	Candidatus_Ovatusbacter
Otu00458	OXI	2.12	0.00226	Firmicutes	Bacilli	Erysipelotrichales	Erysipelotrichaceae	Turicibacter
Otu00597	OXI	2.11	0.0183	Proteobacteria	Alphaproteobacteria	Rhizobiales
Otu00167	OXI	2.11	0.000201	Proteobacteria	Alphaproteobacteria	Reyranellales	Reyranellaceae	Reyranella
Otu01454	MBR	2.11	0.00157	Patescibacteria	Parcubacteria	Candidatus_Kaiserbacteria
Otu01003	PRI	2.11	0.00288	Proteobacteria	Gammaproteobacteria	Burkholderiales	Rhodocyclaceae	Dechloromonas
Otu01189	OXI	2.11	0.00088	Proteobacteria	Gammaproteobacteria	Burkholderiales	SC-I-84
Otu00527	OXI	2.11	0.00026	Chloroflexi	Anaerolineae	Ardenticatenales	Ardenticatenaceae
Otu00756	MBR	2.1	0.00196	Proteobacteria	Alphaproteobacteria	Sphingomonadales	Sphingomonadaceae
Otu01127	MBR	2.1	0.00508	Proteobacteria	Alphaproteobacteria	Rickettsiales	AB1
Otu02520	MBR	2.1	0.000425	Myxococcota	Polyangia	Polyangiales	Sandaracinaceae	Sandaracinus
Otu02362	MBR	2.1	0.000426	Nitrospirota	Nitrospiria	Nitrospirales	Nitrospiraceae	Nitrospira
Otu01218	OXI	2.1	0.00531	Actinobacteriota	Acidimicrobiia	Microtrichales	Microtrichaceae	Sva0996_marine_group
Otu01387	OXI	2.1	0.00196	Proteobacteria	Alphaproteobacteria	Micavibrionales	uncultured
Otu02060	MBR	2.1	0.000425	Proteobacteria	Gammaproteobacteria	Diplorickettsiales	Diplorickettsiaceae
Otu00302	MBR	2.1	0.000424	Bacteroidota	Bacteroidia	Chitinophagales	Saprospiraceae	Lewinella
Otu01216	OXI	2.1	0.000413	SAR324_clade(Marine_group_B)
Otu02078	OXI	2.09	0.00523	Firmicutes	Bacilli	RsaHf231
Otu01534	PRI	2.09	0.00119	Bacteroidota	Kapabacteria	Kapabacteriales
Otu02641	MBR	2.09	8.61e-05	Bacteroidota	Kapabacteria	Kapabacteriales
Otu01324	PRI	2.09	0.00844	Proteobacteria	Gammaproteobacteria	Burkholderiales	Comamonadaceae
Otu00834	OXI	2.09	0.0127	Acidobacteriota	Blastocatellia	Blastocatellales	Blastocatellaceae	Blastocatella
Otu01977	OXI	2.09	0.00631	Acidobacteriota	Blastocatellia	11-24
Otu01108	OXI	2.09	0.0409	Bacteria_unclassified
Otu02346	OXI	2.08	0.00694	Acidobacteriota	Vicinamibacteria	Subgroup_17
Otu01891	MBR	2.08	8.58e-05	Proteobacteria	Alphaproteobacteria	Rickettsiales	SM2D12
Otu01898	MBR	2.08	0.00789	Proteobacteria	Alphaproteobacteria	Rhodospirillales	Rhodospirillaceae
Otu00472	OXI	2.08	0.016	Verrucomicrobiota	Verrucomicrobiae	Pedosphaerales	Pedosphaeraceae	SH3-11
Otu01192	OXI	2.08	0.00189	Proteobacteria	Alphaproteobacteria	Paracaedibacterales	Paracaedibacteraceae
Otu02131	MBR	2.08	0.000425	Proteobacteria	Gammaproteobacteria	Burkholderiales	TRA3-20
Otu01981	OXI	2.08	0.000248	Bacteria_unclassified	Bacteria_unclassified	Bacteria_unclassified
Otu01226	MBR	2.08	9.79e-05	Proteobacteria	Alphaproteobacteria
Otu02619	MBR	2.07	0.000426	Acidobacteriota	Thermoanaerobaculia	Thermoanaerobaculales	Thermoanaerobaculaceae	Subgroup_10
Otu00564	OXI	2.07	0.00141	Proteobacteria	Alphaproteobacteria	Sphingomonadales	Sphingomonadaceae	Sphingobium
Otu01241	OXI	2.07	3.15e-05	Chloroflexi	Anaerolineae	SBR1031	A4b	OLB13
Otu01701	OXI	2.07	0.00153	Chloroflexi	Anaerolineae	SBR1031
Otu00006	PRI	2.07	0.000999	Proteobacteria	Gammaproteobacteria	Pseudomonadales	Pseudomonadaceae	Pseudomonas
Otu03030	MBR	2.07	0.000426	Planctomycetota	Planctomycetes	Planctomycetales
Otu00363	MBR	2.07	8.61e-05	Proteobacteria	Gammaproteobacteria	Legionellales	Legionellaceae	Legionella
Otu01889	MBR	2.07	0.00192	Planctomycetota	Planctomycetes	Gemmatales	Gemmataceae
Otu01380	OXI	2.07	0.0147	Verrucomicrobiota	Chlamydiae	Chlamydiales	Simkaniaceae
Otu00200	OXI	2.07	0.00194	Bacteroidota	Bacteroidia	Chitinophagales	uncultured Saprospiraceae
Otu01379	PRI	2.07	0.00185	Bacteroidota	Bacteroidia	Bacteroidales	Paludibacteraceae
Otu01165	OXI	2.06	0.00135	Bacteroidota	Bacteroidia	Sphingobacteriales	AKYH767
Otu00265	MBR	2.06	0.00189	Proteobacteria	Alphaproteobacteria	Rhizobiales	Rhizobiales_Incertae_Sedis	Phreatobacter
Otu01238	OXI	2.06	0.00119	Actinobacteriota	Actinobacteria	Propionibacteriales	Nocardioidaceae	Nocardioides
Otu00051	MBR	2.06	0.000576	Bacteroidota	Bacteroidia	Cytophagales	uncultured Microscillaceae
Otu00622	PRI	2.06	0.0046	Actinobacteriota	Actinobacteria	Actinomycetales	Actinomycetaceae
Otu02146	OXI	2.06	0.0189	Proteobacteria	Gammaproteobacteria
Otu00503	MBR	2.05	0.000753	Bacteroidota	Bacteroidia	Sphingobacteriales	Sphingobacteriaceae	Pedobacter
Otu01855	MBR	2.05	8.56e-05	Bacteroidota	Bacteroidia	Sphingobacteriales	Lentimicrobiaceae
Otu03349	MBR	2.05	0.00191	Bacteroidota	Bacteroidia	Sphingobacteriales	env.OPS_17
Otu00555	OXI	2.05	0.00164	Planctomycetota	Planctomycetes	Pirellulales	Pirellulaceae
Otu02830	MBR	2.05	0.00723	Verrucomicrobiota	Verrucomicrobiae	Opitutales	Opitutaceae
Otu00376	OXI	2.05	0.00595	Spirochaetota	Leptospirae	Leptospirales	Leptospiraceae	Turneriella
Otu02218	OXI	2.05	0.00235	Patescibacteria	Microgenomatia	Candidatus_Amesbacteria
Otu02314	OXI	2.05	0.00737	Bacteria_unclassified
Otu01032	OXI	2.04	0.000534	Proteobacteria	Alphaproteobacteria	Rhizobiales	Hyphomicrobiaceae	Pedomicrobium
Otu01302	OXI	2.04	0.00482	Planctomycetota	Planctomycetes	Gemmatales	Gemmataceae
Otu02657	MBR	2.04	0.00192	Firmicutes	Bacilli	Erysipelotrichales	Erysipelotrichaceae
Otu02002	OXI	2.04	0.00387	Patescibacteria	Parcubacteria	Candidatus_Kaiserbacteria
Otu01640	OXI	2.03	0.00399	Proteobacteria	Alphaproteobacteria	Rickettsiales	SM2D12
Otu02318	MBR	2.03	0.00161	Proteobacteria	Alphaproteobacteria	Micropepsales	Micropepsaceae
Otu01903	OXI	2.03	0.0137	Firmicutes	Clostridia	Eubacteriales	Eubacteriaceae
Otu02018	OXI	2.03	0.000419	Patescibacteria	ABY1	Candidatus_Uhrbacteria
Otu00431	PRI	2.02	0.00118	Bacteroidota	Bacteroidia	Sphingobacteriales	ST-12K33
Otu00402	OXI	2.02	0.00104	Proteobacteria	Alphaproteobacteria	Rhizobiales	uncultured Rhizobiales_Incertae_Sedis
Otu02583	MBR	2.02	0.00304	Planctomycetota	Phycisphaerae	Phycisphaerales	Phycisphaeraceae	SM1A02
Otu01777	MBR	2.02	0.00529	Bacteroidota	Bacteroidia	Flavobacteriales	Flavobacteriaceae	Flavobacterium
Otu02840	OXI	2.02	0.00198	Patescibacteria	Parcubacteria	Candidatus_Kaiserbacteria
Otu02343	OXI	2.02	0.0087	Patescibacteria	Gracilibacteria	Candidatus_Abawacabacteria
Otu01470	PRI	2.02	0.000111	Proteobacteria	Gammaproteobacteria	Burkholderiales	Rhodocyclaceae
Otu03152	MBR	2.01	0.00192	Acidobacteriota	Vicinamibacteria	Vicinamibacterales	Vicinamibacteraceae
Otu01121	OXI	2.01	0.012	Proteobacteria	Alphaproteobacteria	Tistrellales	Geminicoccaceae	Candidatus_Alysiosphaera
Otu02788	MBR	2.01	0.0134	Proteobacteria	Alphaproteobacteria	Rickettsiales	SM2D12
Otu02922	MBR	2.01	0.00219	Proteobacteria	Alphaproteobacteria	Micavibrionales	Micavibrionaceae
Otu00202	PRI	2.01	0.0107	Firmicutes	Bacilli	Lactobacillales	Streptococcaceae	Candidatus_+I123:I131
Otu00733	MBR	2.01	0.000425	Bacteroidota	Bacteroidia	Cytophagales	Cytophagaceae	Cytophaga
Otu01415	PRI	2.01	0.000205	Firmicutes	Clostridia	Christensenellales	Christensenellaceae
Otu02704	OXI	2.01	0.00166	Verrucomicrobiota	Chlamydiae	Chlamydiales	Chlamydiales_unclassified
Otu02864	OXI	2.01	0.00106	Patescibacteria	ABY1	Candidatus_Komeilibacteria
Otu01316	PRI	2.01	0.00897	Proteobacteria	Gammaproteobacteria	Burkholderiales	Sutterellaceae	Parasutterella
Otu03376	MBR	2.01	0.00665	Acidobacteriota	Acidobacteriae	Bryobacterales	Bryobacteraceae	Bryobacter
Otu02091	OXI	2.01	0.000163	Patescibacteria	Gracilibacteria	Absconditabacteriales_(SR1)
Otu01023	OXI	2.01	0.000151	Bdellovibrionota	Oligoflexia	0319-6G20	0319-6G20_fa	0319-6G20
Otu03366	MBR	2	0.0019	Nitrospirota	Nitrospiria	Nitrospirales	Nitrospiraceae	Nitrospira
Otu00216	OXI	2	0.000864	Proteobacteria	Gammaproteobacteria	Burkholderiales	Comamonadaceae	Inhella

## Sheet: TblS9.Chem-MicroCorrelation
Table S9. Spearman correlation coefficients between measured concentrations of pharmaceutical groups and calculated Bray-Curtis distance matrix of respective effluent microbiomes. The 'Miscellaneous' group includes pharmaceuticals that did not corrspond to any other group. SERM, selective estrogen receptor modulator; na, not applicable
	Analgesic	Antacid	Antibiotic	Anticonvulsant	Antidepressant	Antidiabetic	Antifungal	Antihistamine	Antiviral	Benzodiazepine	Beta Blocker	Bronchodilator	Calcium Channel Blocker	Cholesterol	Corticosteroid	Miscellaneous	Muscle Relaxer	Opiate	Sedative	SERM	Stimulant
r	0.09	0.21	0.07	0.14	0.12	0.15	0.03	0.17	0.13	0.02	0.15	0.08	0.19	0.07	0.1	0.04	-0.12	0.05	0.02	na	0.19
p-value	0.16	<0.05	0.15	0.05	0.06	<0.05	0.32	<0.05	0.08	0.39	<0.05	0.21	<0.05	0.21	0.14	0.28	0.94	0.28	0.38	na	<0.05

[truncated: 2 more sheets: FigS1.PctSeqReads, FigS2.Top20OTUs]
